# Supplementary material for: Configuration-guided reactions: the case of highly decorated spiro[cyclopropane-1,2′(3′H)-pyrrolo[1,2-b]isoxazole] derivatives en route to polyhydroxyindolizidines
Source: Royal Society of Chemistry journal article supplement (doi:10.1039/c6qo00410e), 2016-01-01
Supplement: c6qo00410e1.pdf [file c6qo00410e1.pdf]

## SUPPLEMENTARY INFORMATION

### Configuration-guided reactions: the case of highly decorated spiro[cyclopropane-1,2'-(3'*H*)-pyrrolo[1,2-*b*]isoxazole derivatives en route to polyhydroxyindolizidines

F. M. Cordero, C. Vurchio, C. Faggi, and A. Brandi

Department of Chemistry “Ugo Schiff”, University of Firenze, Via della Lastruccia 13, 50019 Sesto Fiorentino (FI), Italy

#### Table of Contents

| Compound |                                        | page |
|----------|----------------------------------------|------|
|          | X-Ray Data Collection                  | S2   |
| 10       | Cristallographic data                  | S3   |
| 11       | Cristallographic data                  | S3   |
| 12       | Cristallographic data                  | S3   |
| 25       | Cristallographic data                  | S4   |
| 26       | Cristallographic data                  | S4   |
| 7        | <sup>1</sup> H and <sup>13</sup> C NMR | S5   |
| 8        | <sup>1</sup> H and <sup>13</sup> C NMR | S7   |
| 9        | <sup>1</sup> H and <sup>13</sup> C NMR | S9   |
| 10       | <sup>1</sup> H and <sup>13</sup> C NMR | S11  |
| 11       | <sup>1</sup> H and <sup>13</sup> C NMR | S13  |
| 12       | <sup>1</sup> H and <sup>13</sup> C NMR | S15  |
| 13       | <sup>1</sup> H and <sup>13</sup> C NMR | S17  |
| 14       | <sup>1</sup> H and <sup>13</sup> C NMR | S19  |
| 15       | <sup>1</sup> H and <sup>13</sup> C NMR | S21  |
| 17       | <sup>1</sup> H and <sup>13</sup> C NMR | S23  |
| 18       | <sup>1</sup> H and <sup>13</sup> C NMR | S25  |
| 19       | <sup>1</sup> H and <sup>13</sup> C NMR | S27  |
| 23       | <sup>1</sup> H NMR                     | S29  |
| 25       | <sup>1</sup> H and <sup>13</sup> C NMR | S30  |
| 26       | <sup>1</sup> H and <sup>13</sup> C NMR | S32  |
| 30       | <sup>1</sup> H and <sup>13</sup> C NMR | S34  |
| 31       | <sup>1</sup> H and <sup>13</sup> C NMR | S36  |
| 32       | <sup>1</sup> H and <sup>13</sup> C NMR | S38  |
| 33       | <sup>1</sup> H and <sup>13</sup> C NMR | S40  |
| 34       | <sup>1</sup> H and <sup>13</sup> C NMR | S42  |
| 35       | <sup>1</sup> H and <sup>13</sup> C NMR | S44  |

## X-Ray Data Collection:

Crystals, mounted on a glass fiber, were analyzed using a Goniometer Oxford Diffraction KM4 Xcalibur2 with a graphite-monochromated Cu/K $\alpha$  radiation (40mA/-40KV). For all of them measures were carried out at 100°K, except for compound **12** which temperature was held at 150°K.

## Structures refinement:

The integrated intensities, measured using the  $\omega$  scan mode, were corrected for Lorentz and polarization effects.\*

The substantial redundancy in data allows empirical absorption corrections to be applied using multiple measurements of symmetry-equivalent reflections.

Structures were solved by direct methods of SIR2004\*\* and refined using the full-matrix least squares on F<sup>2</sup> provided by SHELXL-2014/6 (Sheldrick, 2014)\*\*\*.

The non-hydrogen atoms were refined anisotropically.

In all cases hydrogen atoms were assigned in calculated positions and all of them were refined as isotropic.

Copies of the data can be obtained, free of charge, from CCDC, 12 Union Road, Cambridge, CB2 1EZ UK (e-mail: [deposit@ccdc.cam.ac.uk](mailto:deposit@ccdc.cam.ac.uk); internet://www.ccdc.cam.ac.uk) with the deposition numbers reported below for each compound.

- \* Walker, N.; Stuart, D.; *Acta Crystallogr. Sect.A*, **1983**, 39, 158-166
- \*\* Burla M.C., Camalli M., Carrozzini B., Cascarano G.L., Giacovazzo C., Polidori G., Spagna R., Caliendo, R., De Caro L. *SIR2004: An Improved Tool for Crystal Structure Determination and Refinement*, Journal of Applied Crystallography 38(2): 381-388
- \*\*\* Sheldrick, G, M. *Crystal Structure Refinement with SHELXL*; Acta Cryst. (2015). C71, 3-8

The following programs have been used for solution, refinement, graphic and deposition of data:

**WinGX**: Farrugia, L. J. (2012). J. Appl. Cryst. 45, 849-854.

**ORTEP-3**: Farrugia, L. J. (2012). J. Appl. Cryst. 45, 849-854.

**enCIFer**: Allen, F. H., Johnson, O., Shields, G. P., Smith, B. R. & Towler, M. (2004). J. Appl. Cryst. 37, 335-338.

**Cristallographic data 10 (exp\_1273):**

$C_{17}H_{31}NO_4$ ,  $M=313.43$ , Orthorhombic, space group  $P\ 21\ 21\ 2$ ,  $a=17.643(1)$ ,  $b=16.144(1)$ ,  $c=6.601(1)\text{\AA}$ ,  $V=1880.2(3)\text{\AA}^3$ ,  $Z=4$   $D_c=1.107\text{ Mg/m}^3$ ,  $\mu=0.625\text{ mm}^{-1}$ ,  $F(000)=688$ .

5913 reflections were collected with a  $5.013^\circ < \theta < 70.844^\circ$  range with a completeness to theta 99,1%; 3079 were independent, the parameters were 199 and the final R index was 0.0456 for reflections having  $I > 2\sigma I$ .

Deposition number at the Cambridge Crystallographic Data Center: **CCDC 1496575**.

An intermolecular hydrogen bond is present between O2-H2-N1(1):

| Distance X-H       | Distance X-Y       | Distance H-Y       | Angle X-H-Y |
|--------------------|--------------------|--------------------|-------------|
| 0.820 $\text{\AA}$ | 2.742 $\text{\AA}$ | 1.939 $\text{\AA}$ | 166.38°     |

The relative symmetry operation is (1)=  $x, +y, +z+1$

**Cristallographic data 11 (exp\_1272):**

$C_{17}H_{31}NO_4$ ,  $M=313.43$ , Orthorhombic, space group  $P\ 21\ 21\ 21$ ,  $a=6.030(1)$ ,  $b=16.334(1)$ ,  $c=18.224(1)\text{\AA}$ ,  $V=1795.0(3)\text{\AA}^3$ ,  $Z=4$   $D_c=1.160\text{ Mg/m}^3$ ,  $\mu=0.665\text{ mm}^{-1}$ ,  $F(000)=688$ .

5696 reflections were collected with a  $4.853^\circ < \theta < 70.654^\circ$  range with a completeness to theta 99,0%; 2886 were independent, the parameters were 200 and the final R index was 0.0333 for reflections having  $I > 2\sigma I$ .

Deposition number at the Cambridge Crystallographic Data Center: **CCDC 1496576**.

Also in this case an intermolecular hydrogen bond is present between O2-H2-N1(1):

| Distance X-H       | Distance X-Y       | Distance H-Y       | Angle X-H-Y |
|--------------------|--------------------|--------------------|-------------|
| 0.820 $\text{\AA}$ | 2.842 $\text{\AA}$ | 2.079 $\text{\AA}$ | 154.63°     |

The relative symmetry operation is (1)=  $x-1, +y, +z$

**Cristallographic data 12 (exp\_1121):**

$4x(C_{13}H_{21}NO_3)$ ,  $M=957.23$ , Monoclinic, space group  $P\ 21$ ,  $a=10.178(1)$ ,  $b=21.780(1)$ ,  $c=11.615(1)\text{\AA}$ ,  $\beta=90.547(1)^\circ$ ,  $V=2574.7(4)\text{\AA}^3$ ,  $Z=2$   $D_c=1.235\text{ Mg/m}^3$ ,  $\mu=0.705\text{ mm}^{-1}$ ,  $F(000)=1040$ .

14484 reflections were collected with a  $4.314^\circ < \theta < 70.399^\circ$  range with a completeness to theta 93,4%; 7357 were independent, the parameters were 613 and the final R index was 0.0450 for reflections having  $I > 2\sigma I$ .

Deposition number at the Cambridge Crystallographic Data Center: **CCDC 1496577**.

No significant interactions were detected.

**Cristallographic data 25 (exp\_24):**

$C_{13}H_{21}NO_3$ ,  $M=239.31$ , Orthorhombic, space group P 21 21 21,  $a=6.078(1)$ ,  $b=10.204(1)$ ,  $c=19.957(1)\text{\AA}$ ,  $V=123770(1)\text{\AA}^3$ ,  $Z=4$   $D_c=1.284\text{ Mg/m}^3$ ,  $\mu=0.733\text{ mm}^{-1}$ ,  $F(000)=520$ .

3937 reflections were collected with a  $4.867^\circ < \theta < 70.378^\circ$  range with a completeness to theta 98,3%; 1946 were independent, the parameters were 154 and the final R index was 0.0404 for reflections having  $I > 2\sigma I$ .

Deposition number at the Cambridge Crystallographic Data Center: **CCDC 1496578**.

No significant interactions were detected.

**Cristallographic data 26 (exp\_94):**

$2x(C_{26}H_{42}N_2O_6)$ ,  $M=957.23$ , Monoclinic, space group P 21,  $a=7.252(1)$ ,  $b=25.570(1)$ ,  $c=14.465(1)\text{\AA}$ ,  $\beta=100.170(2)^\circ$ ,  $V=2640.2(4)\text{\AA}^3$ ,  $Z=2$   $D_c=1.204\text{ Mg/m}^3$ ,  $\mu=0.687\text{ mm}^{-1}$ ,  $F(000)=1040$ .

11770 reflections were collected with a  $4.648^\circ < \theta < 72.537^\circ$  range with a completeness to theta 99,4%; 7615 were independent, the parameters were 613 and the final R index was 0.0492 for reflections having  $I > 2\sigma I$ .

Deposition number at the Cambridge Crystallographic Data Center: **CCDC 1496579**.

No significant interactions were detected.

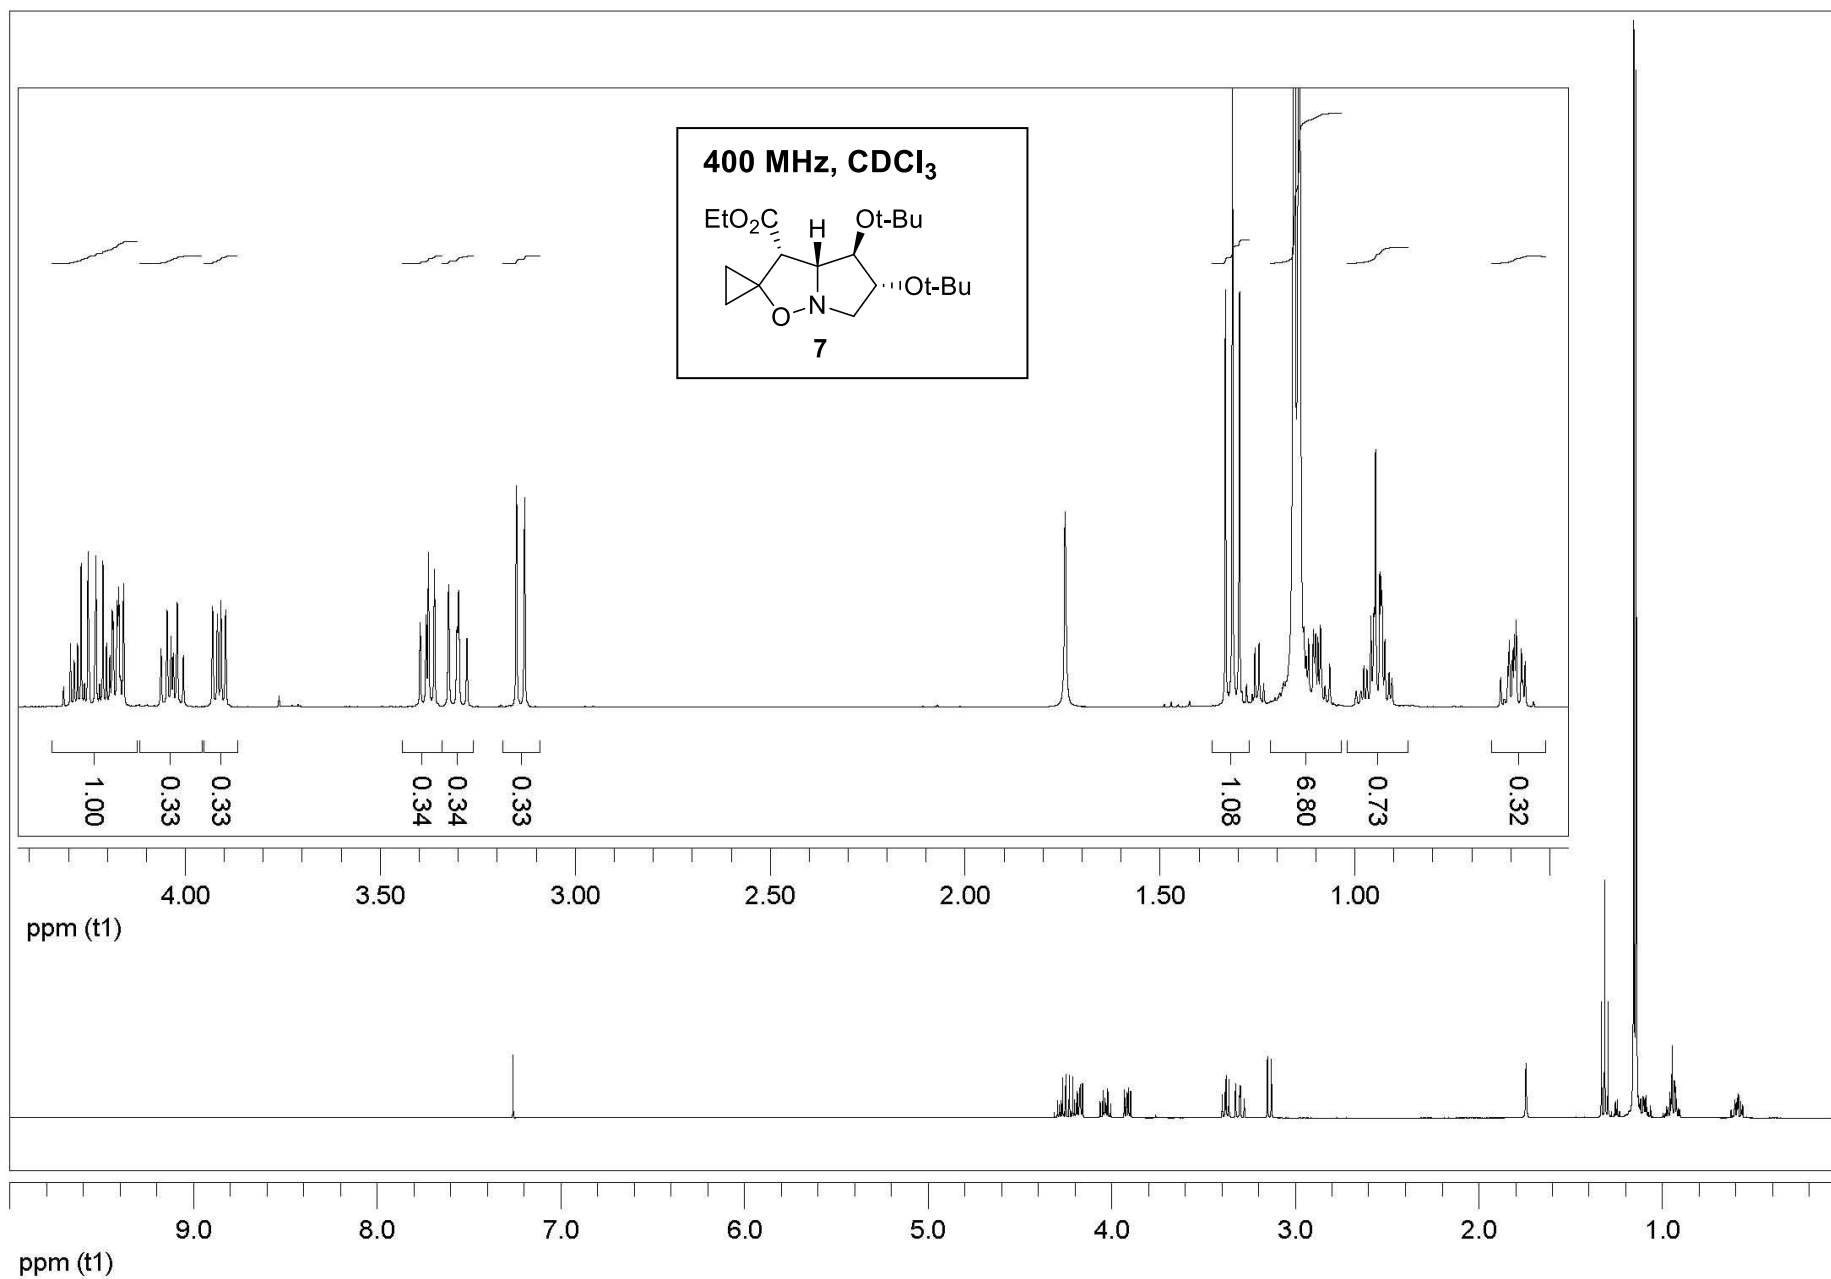

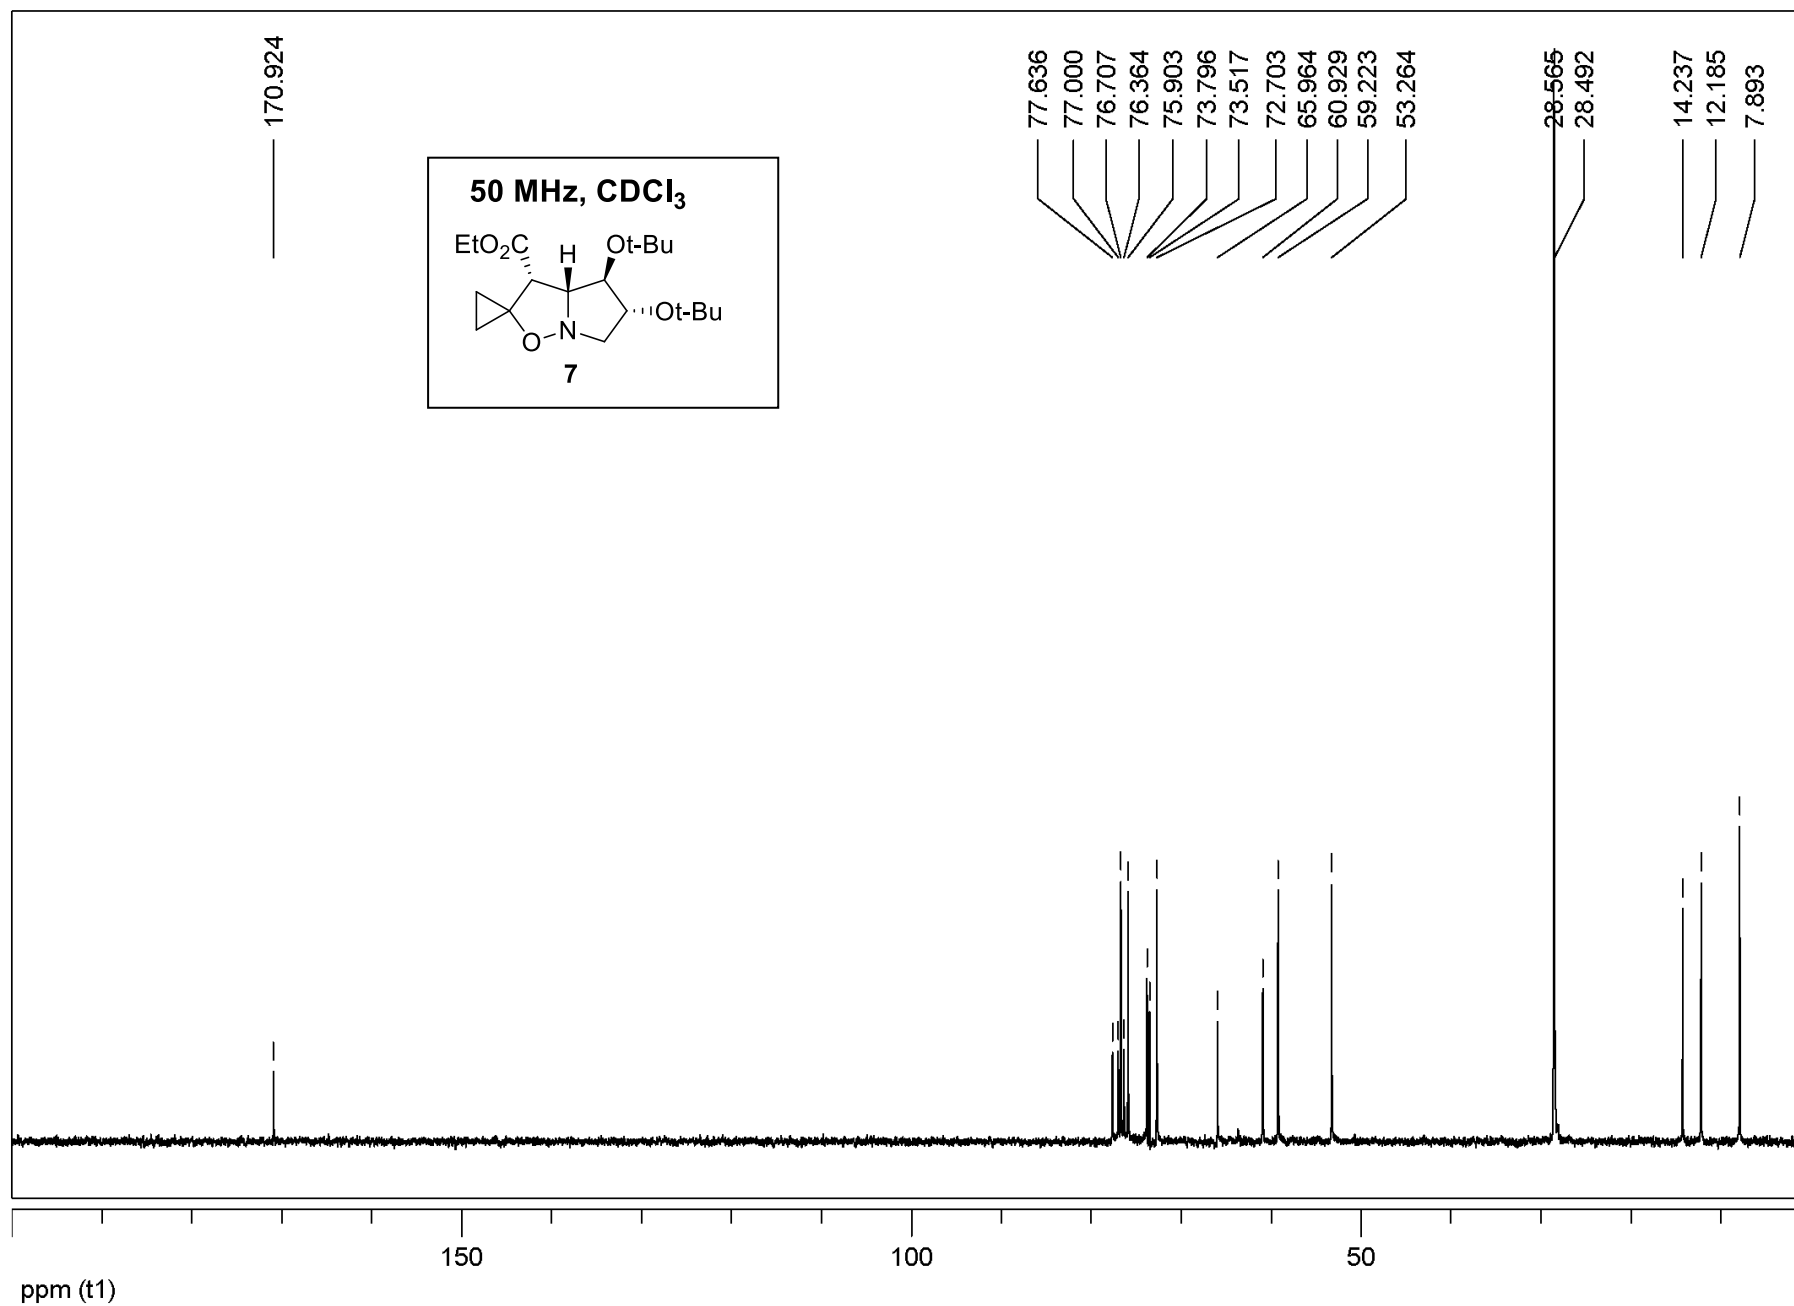

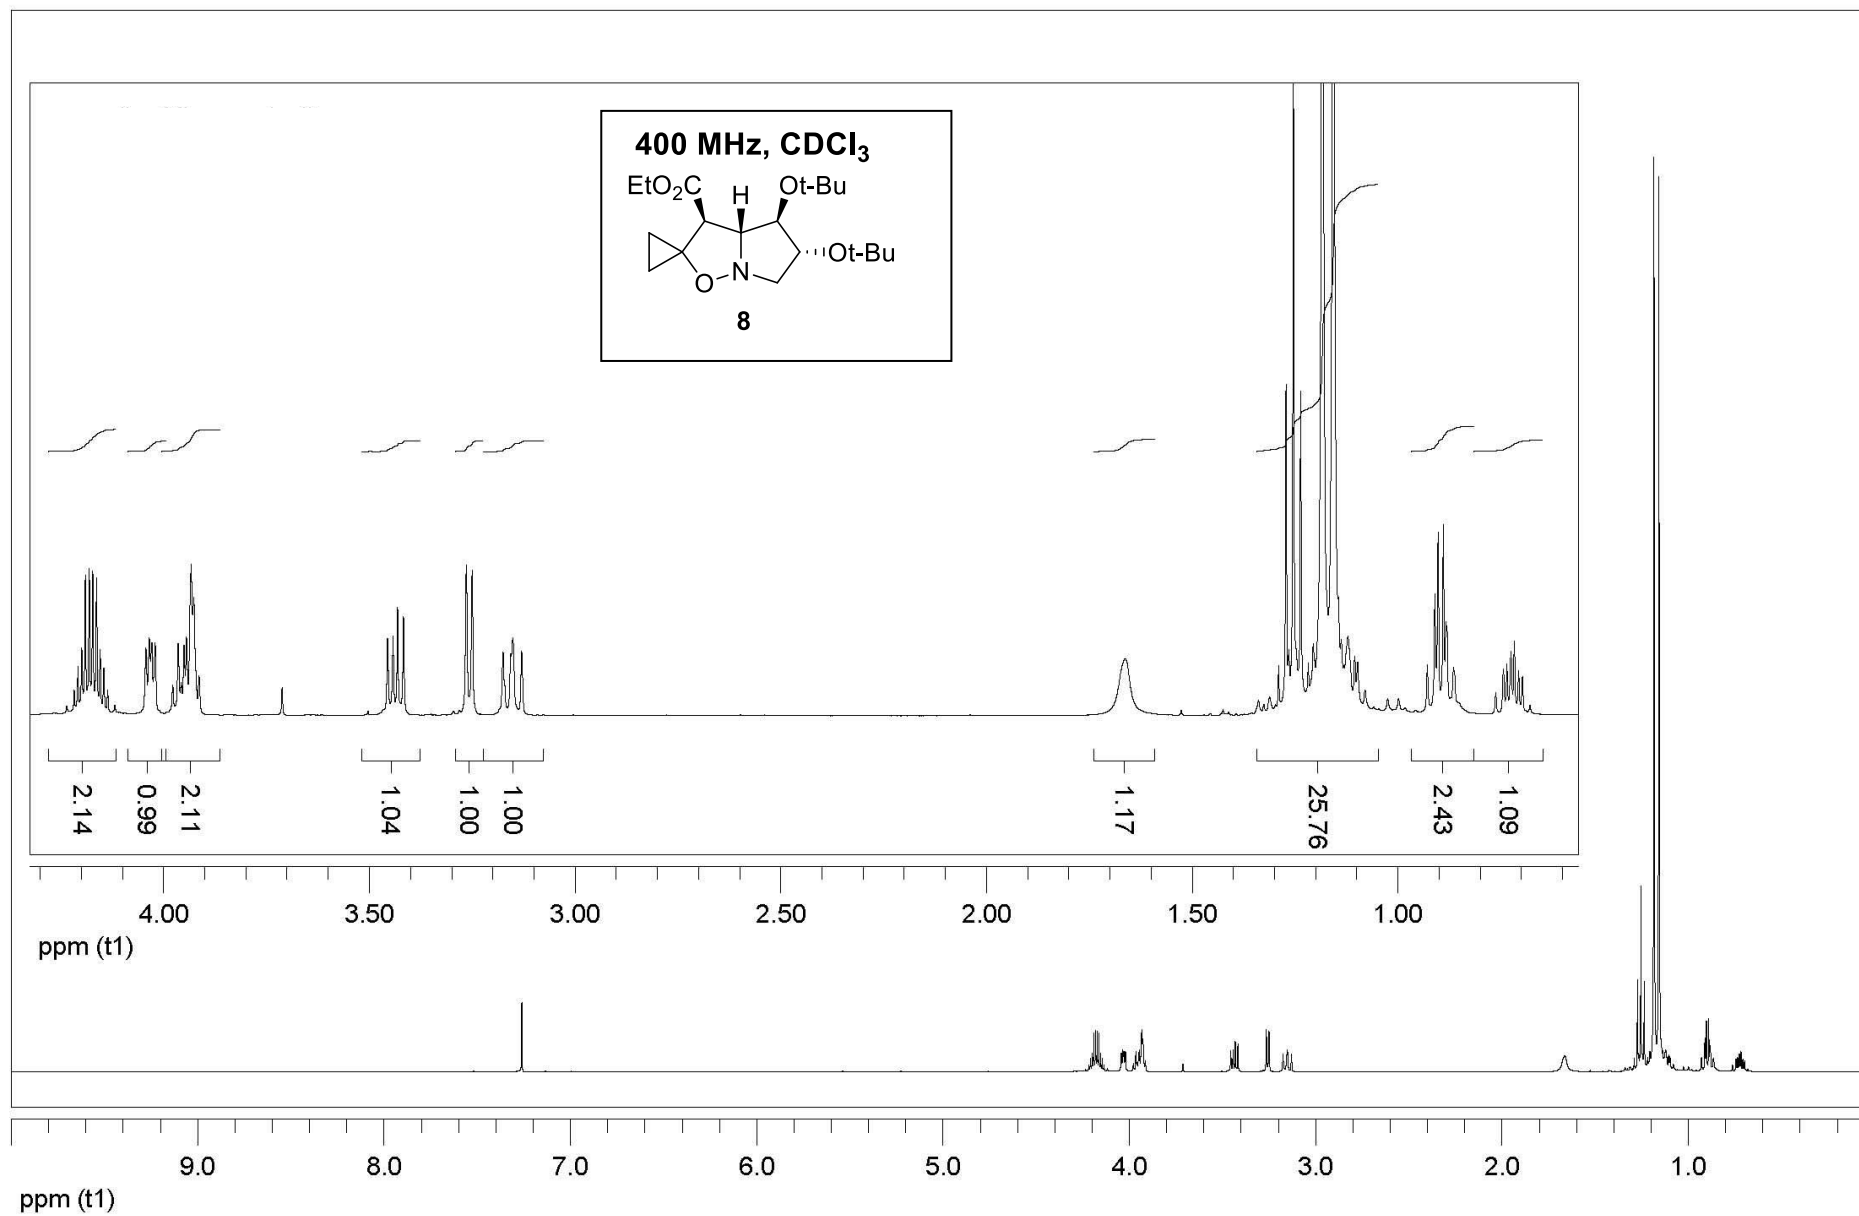

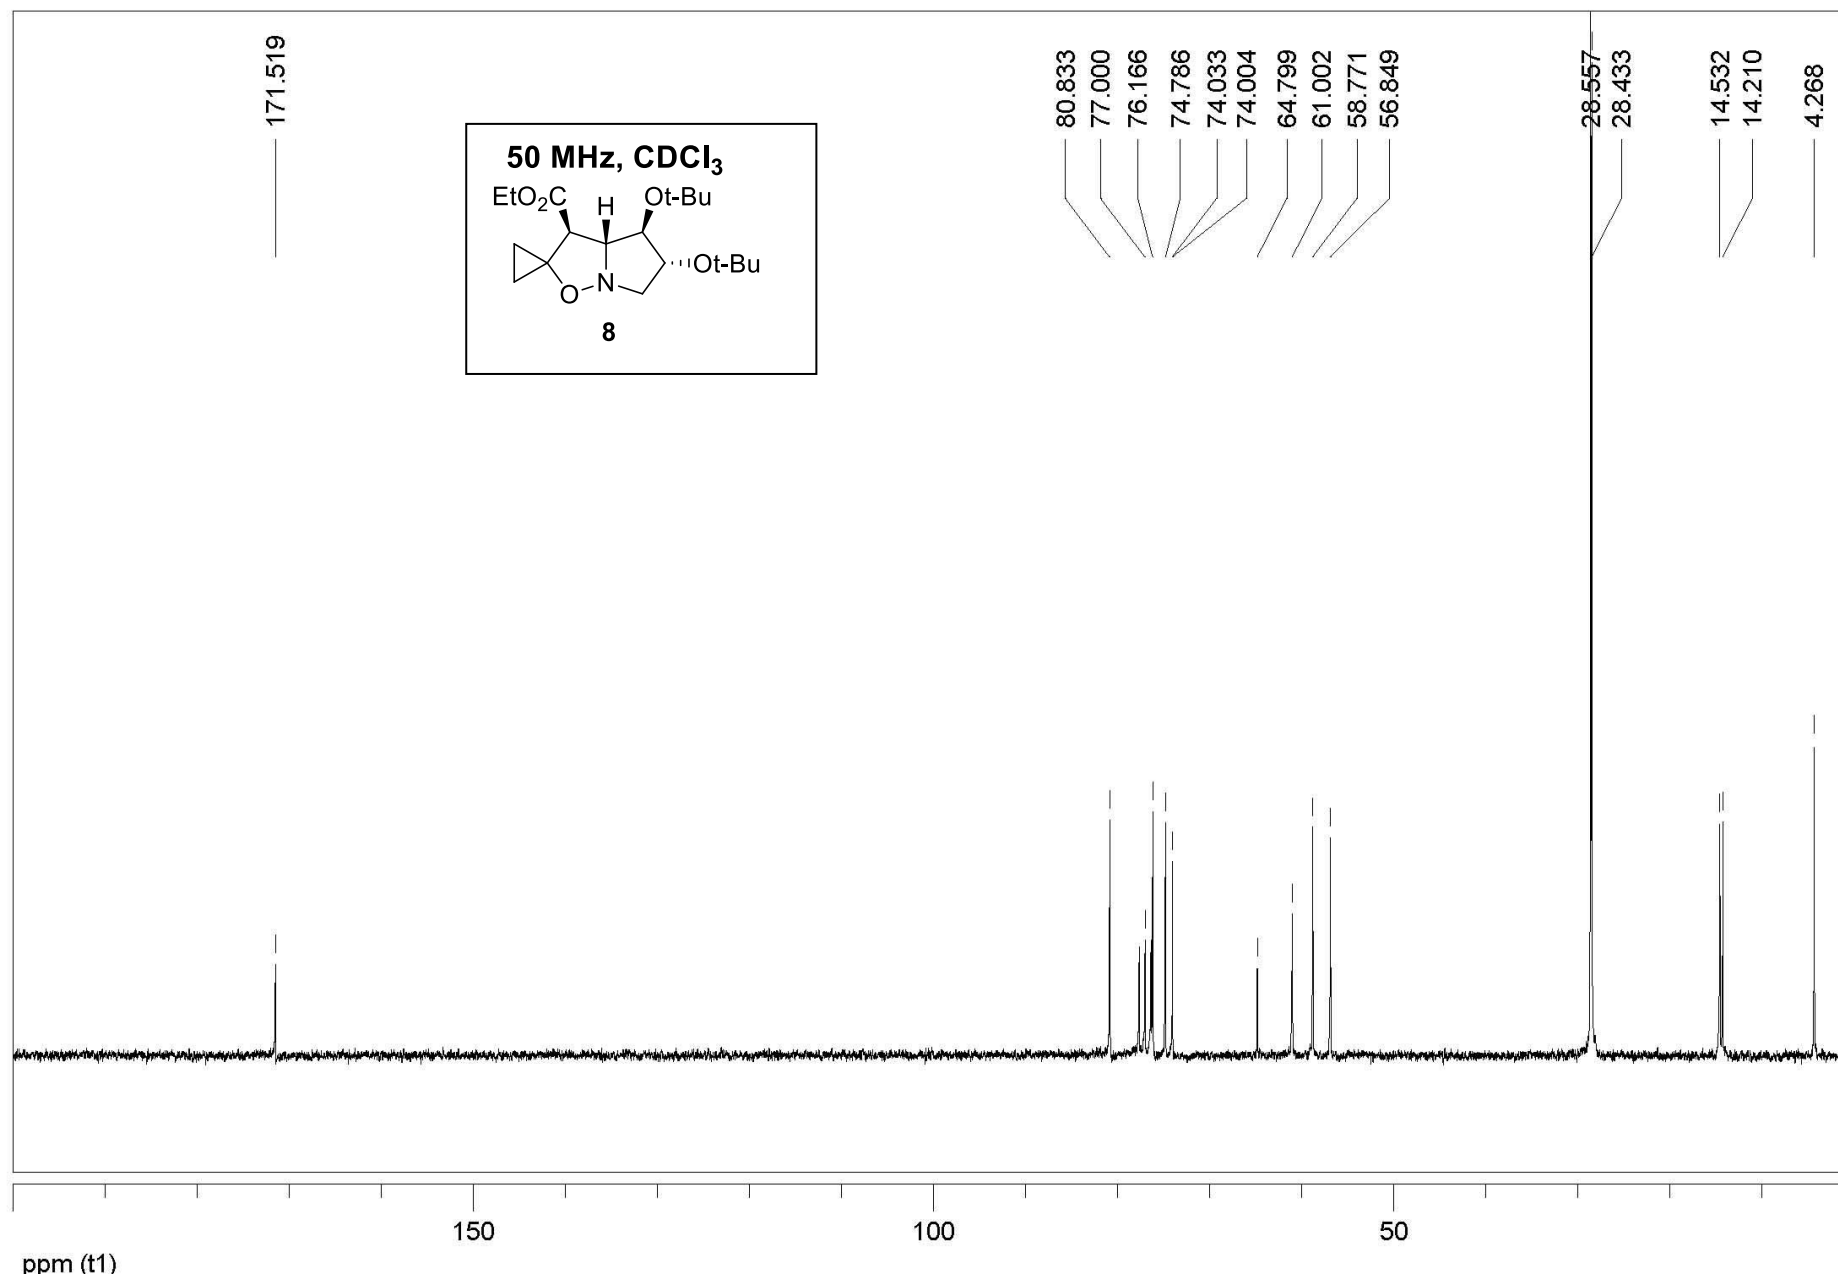

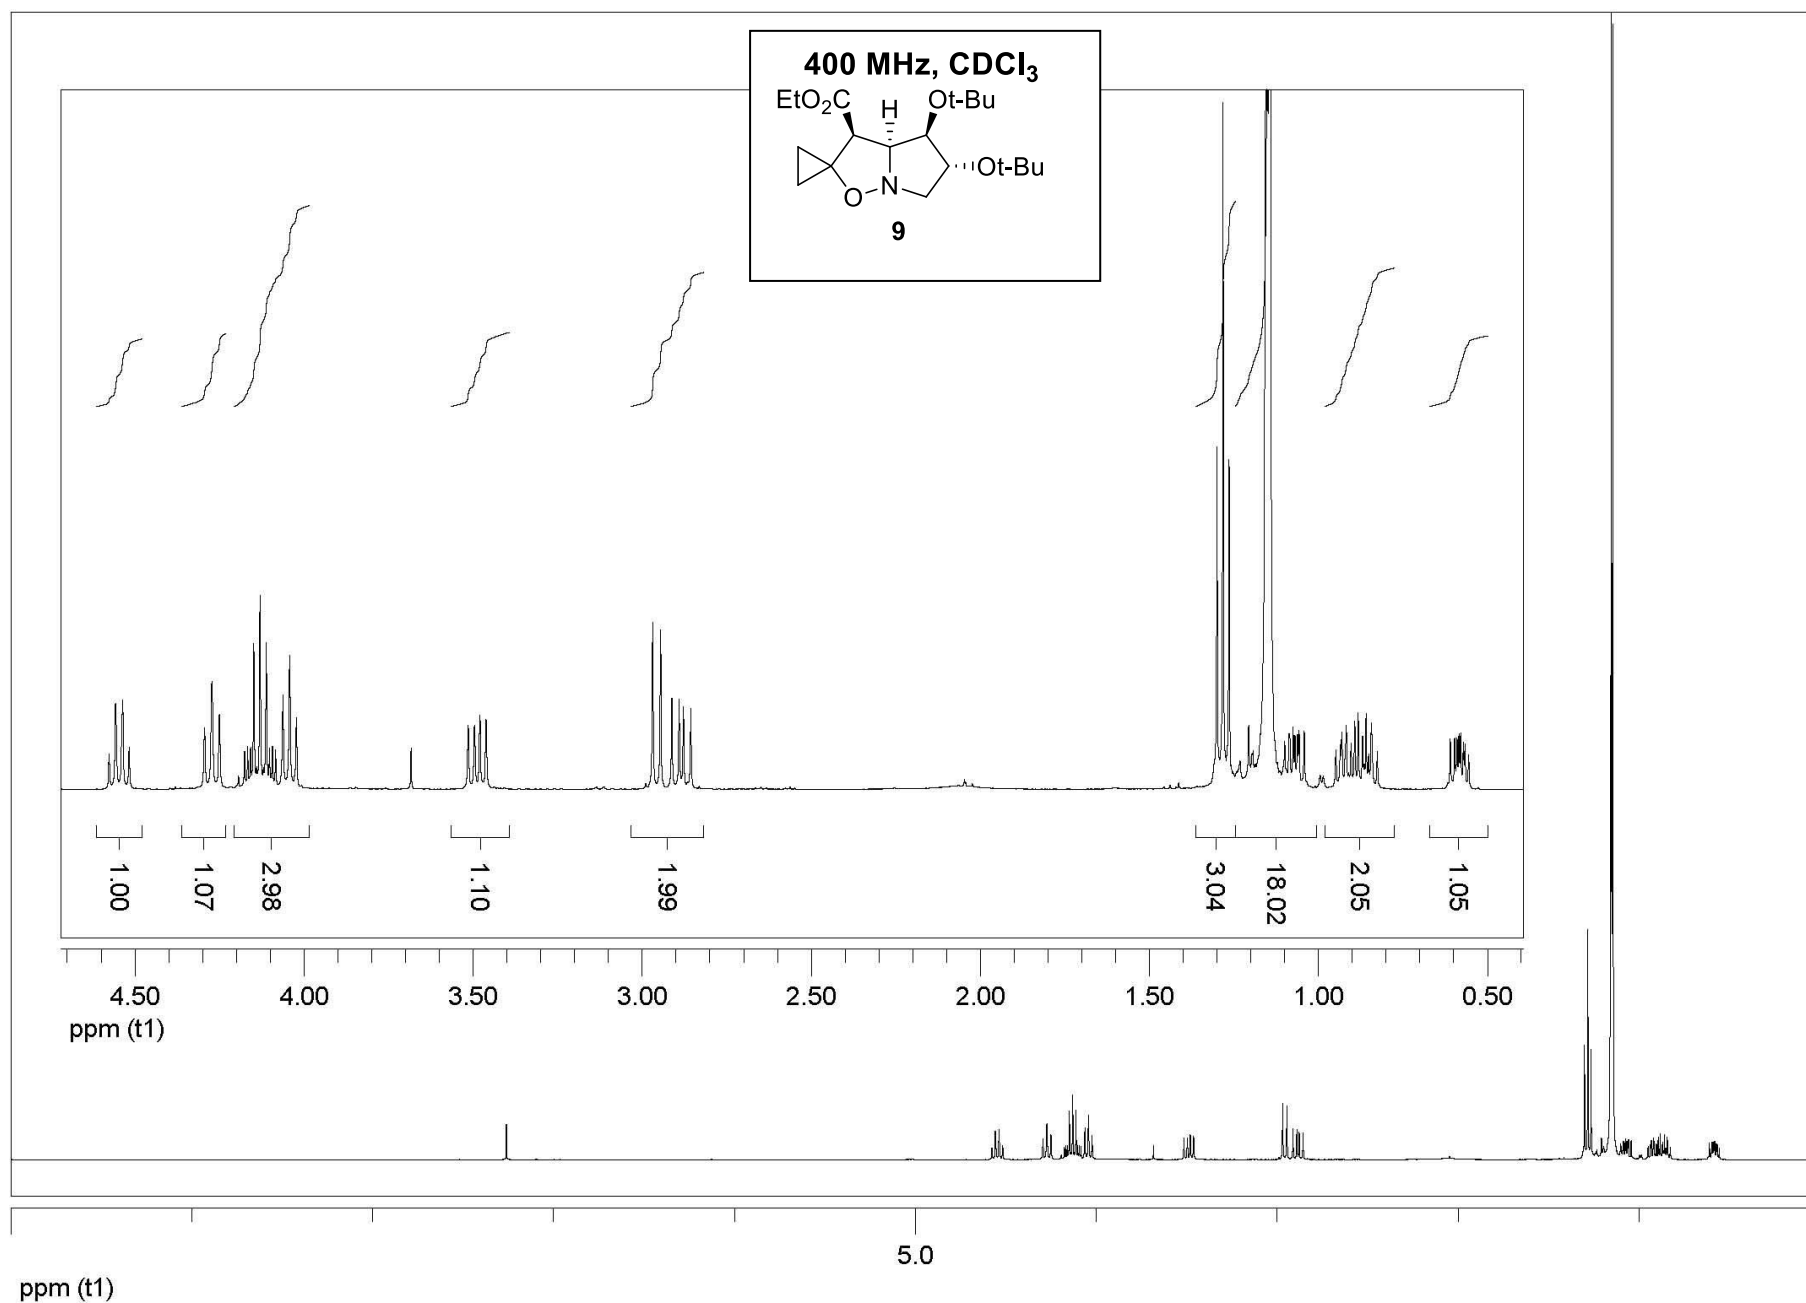

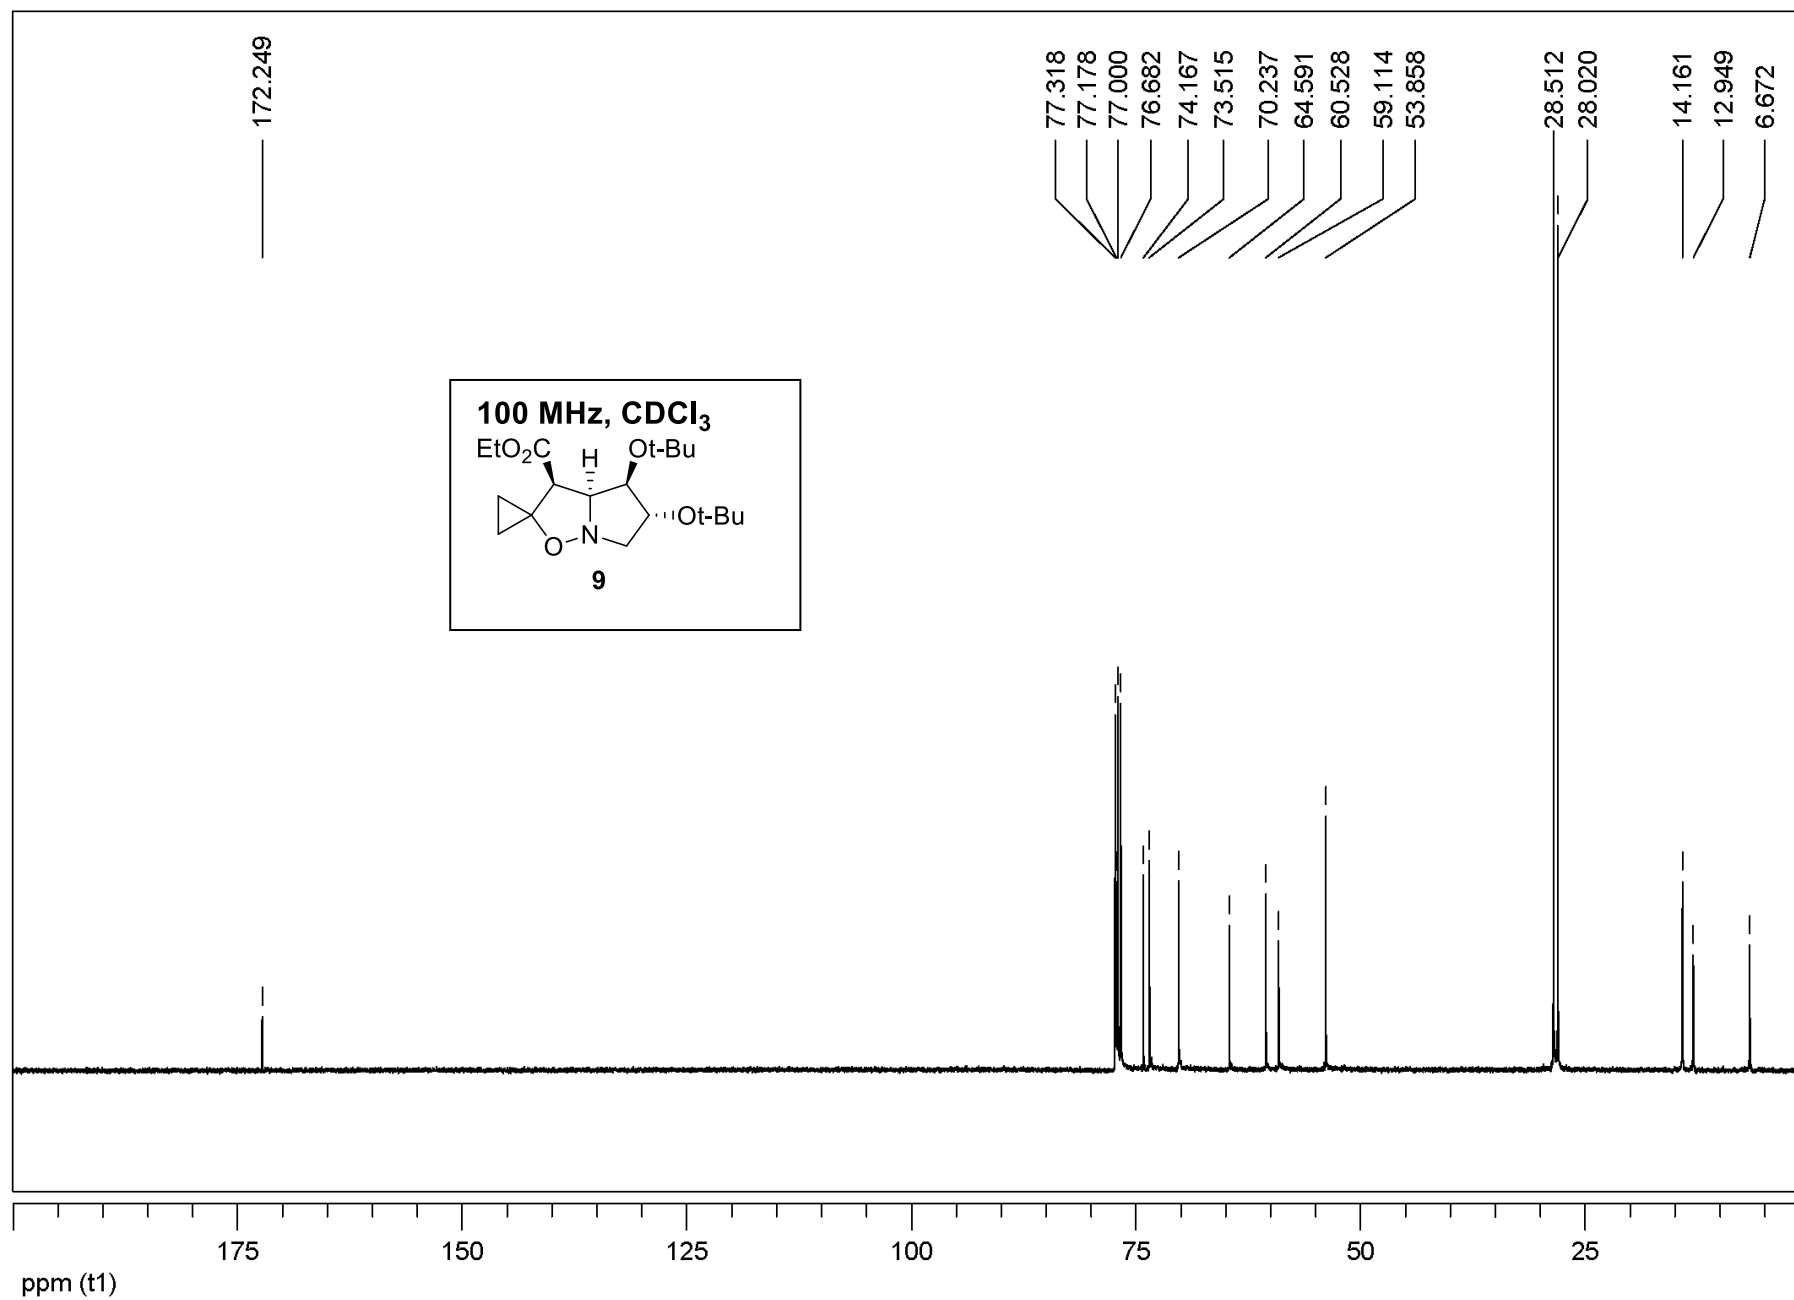

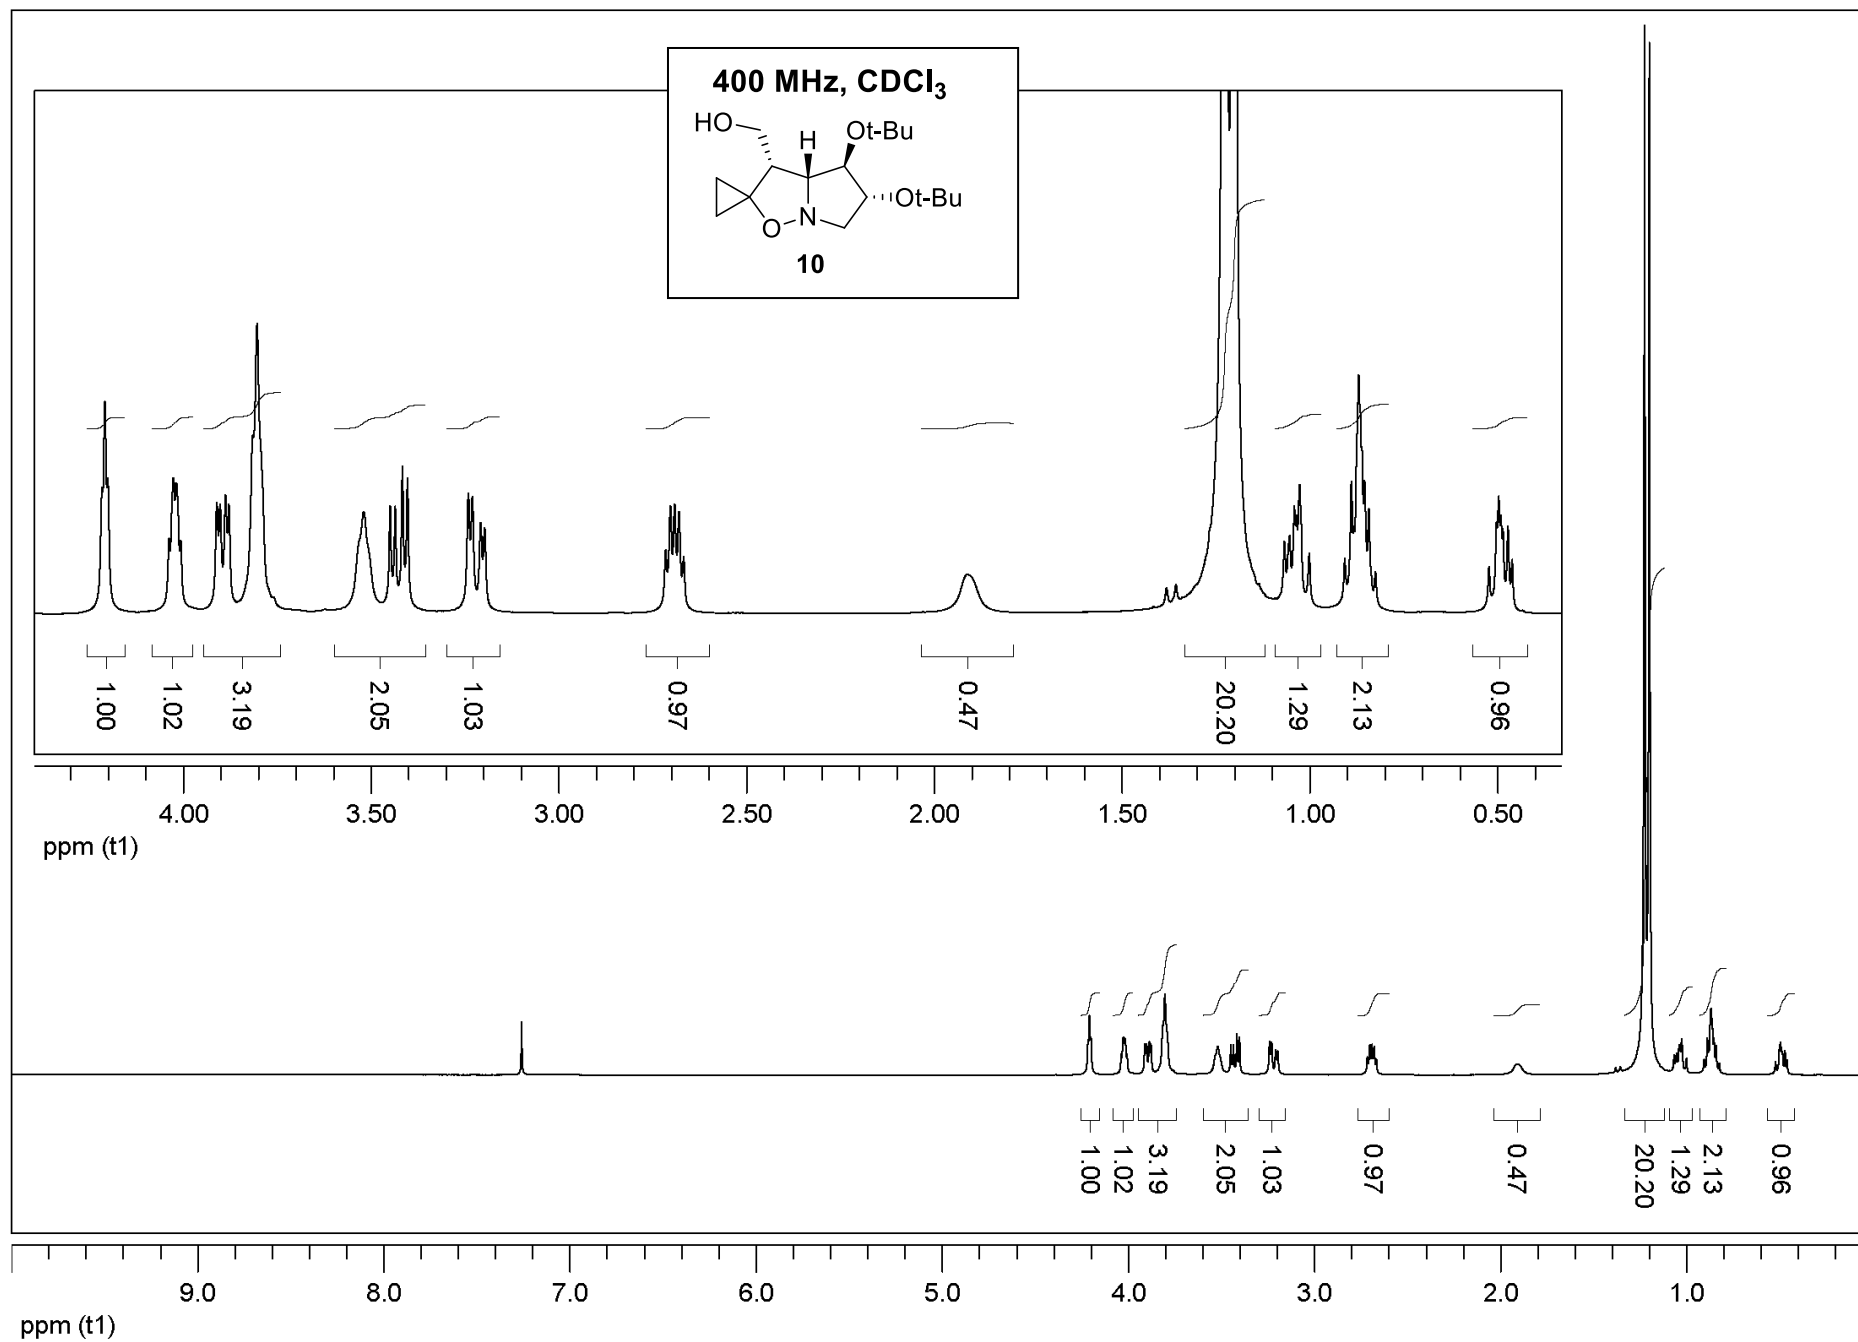

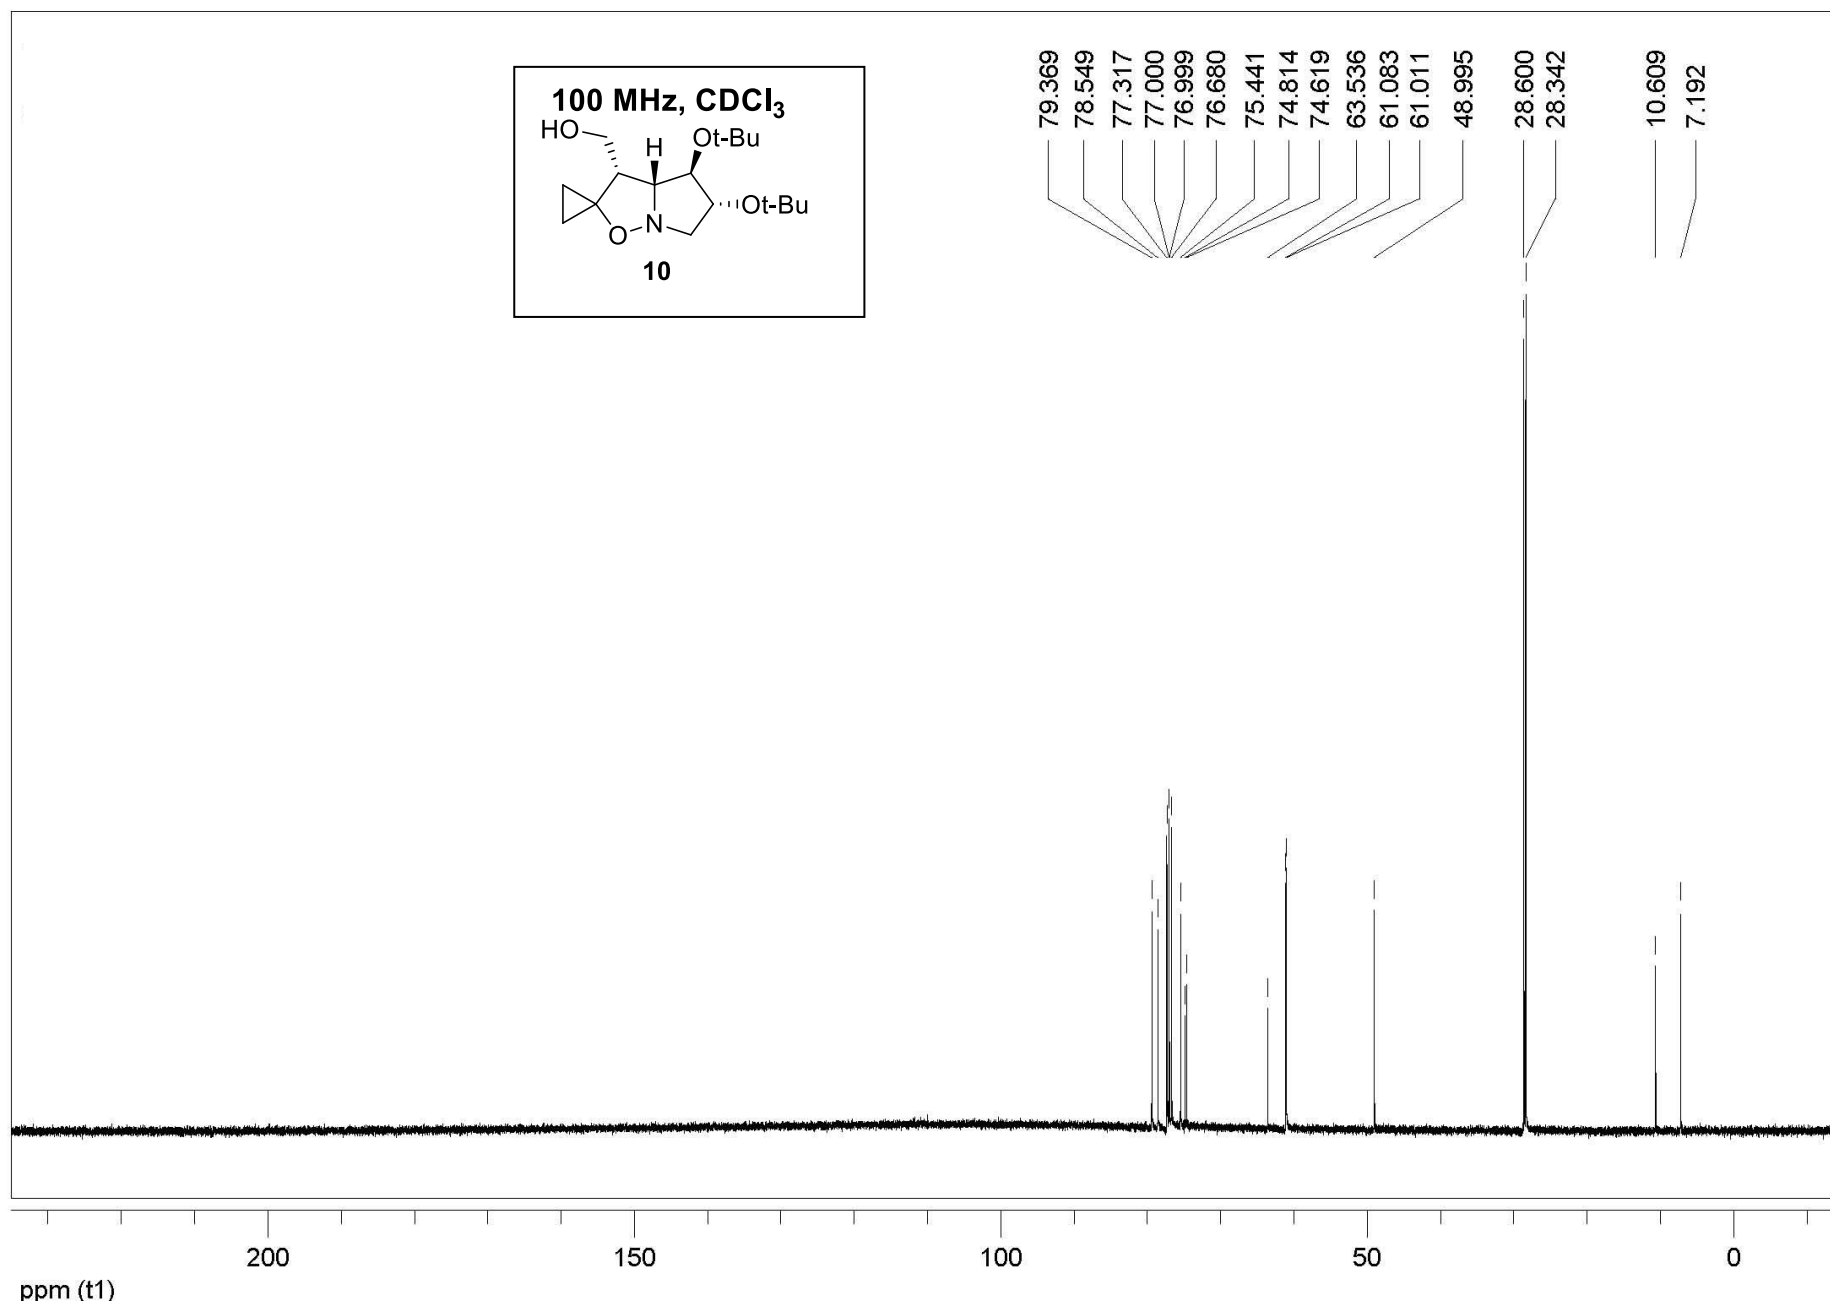

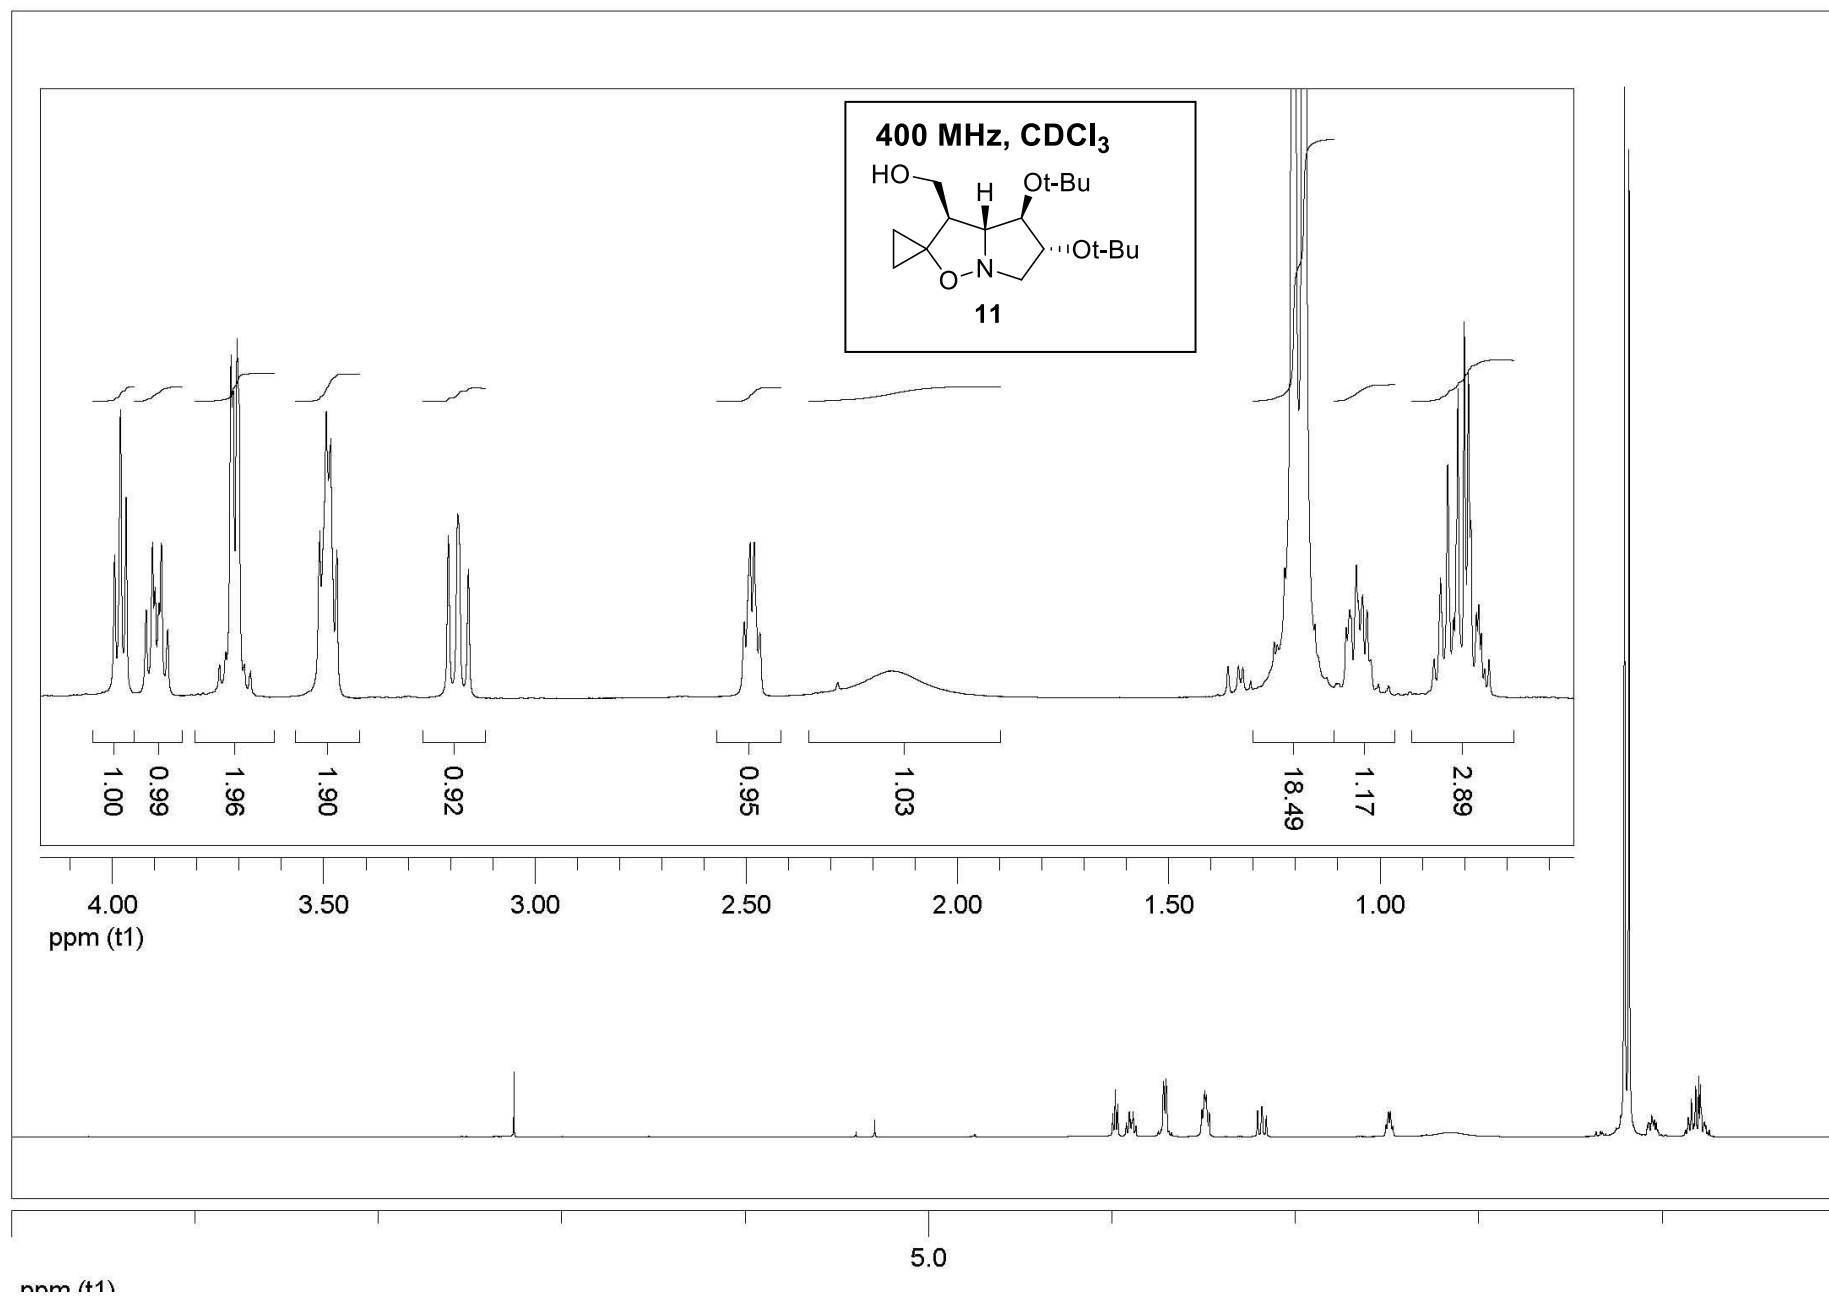

100 MHz, CDCl<sub>3</sub>

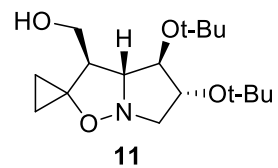

80.703  
77.318  
77.000  
76.682  
75.693  
74.029  
73.962  
73.416  
63.986  
63.874  
59.335  
52.517

29.047  
28.509

13.425

1.929

ppm (t1)

150

100

50

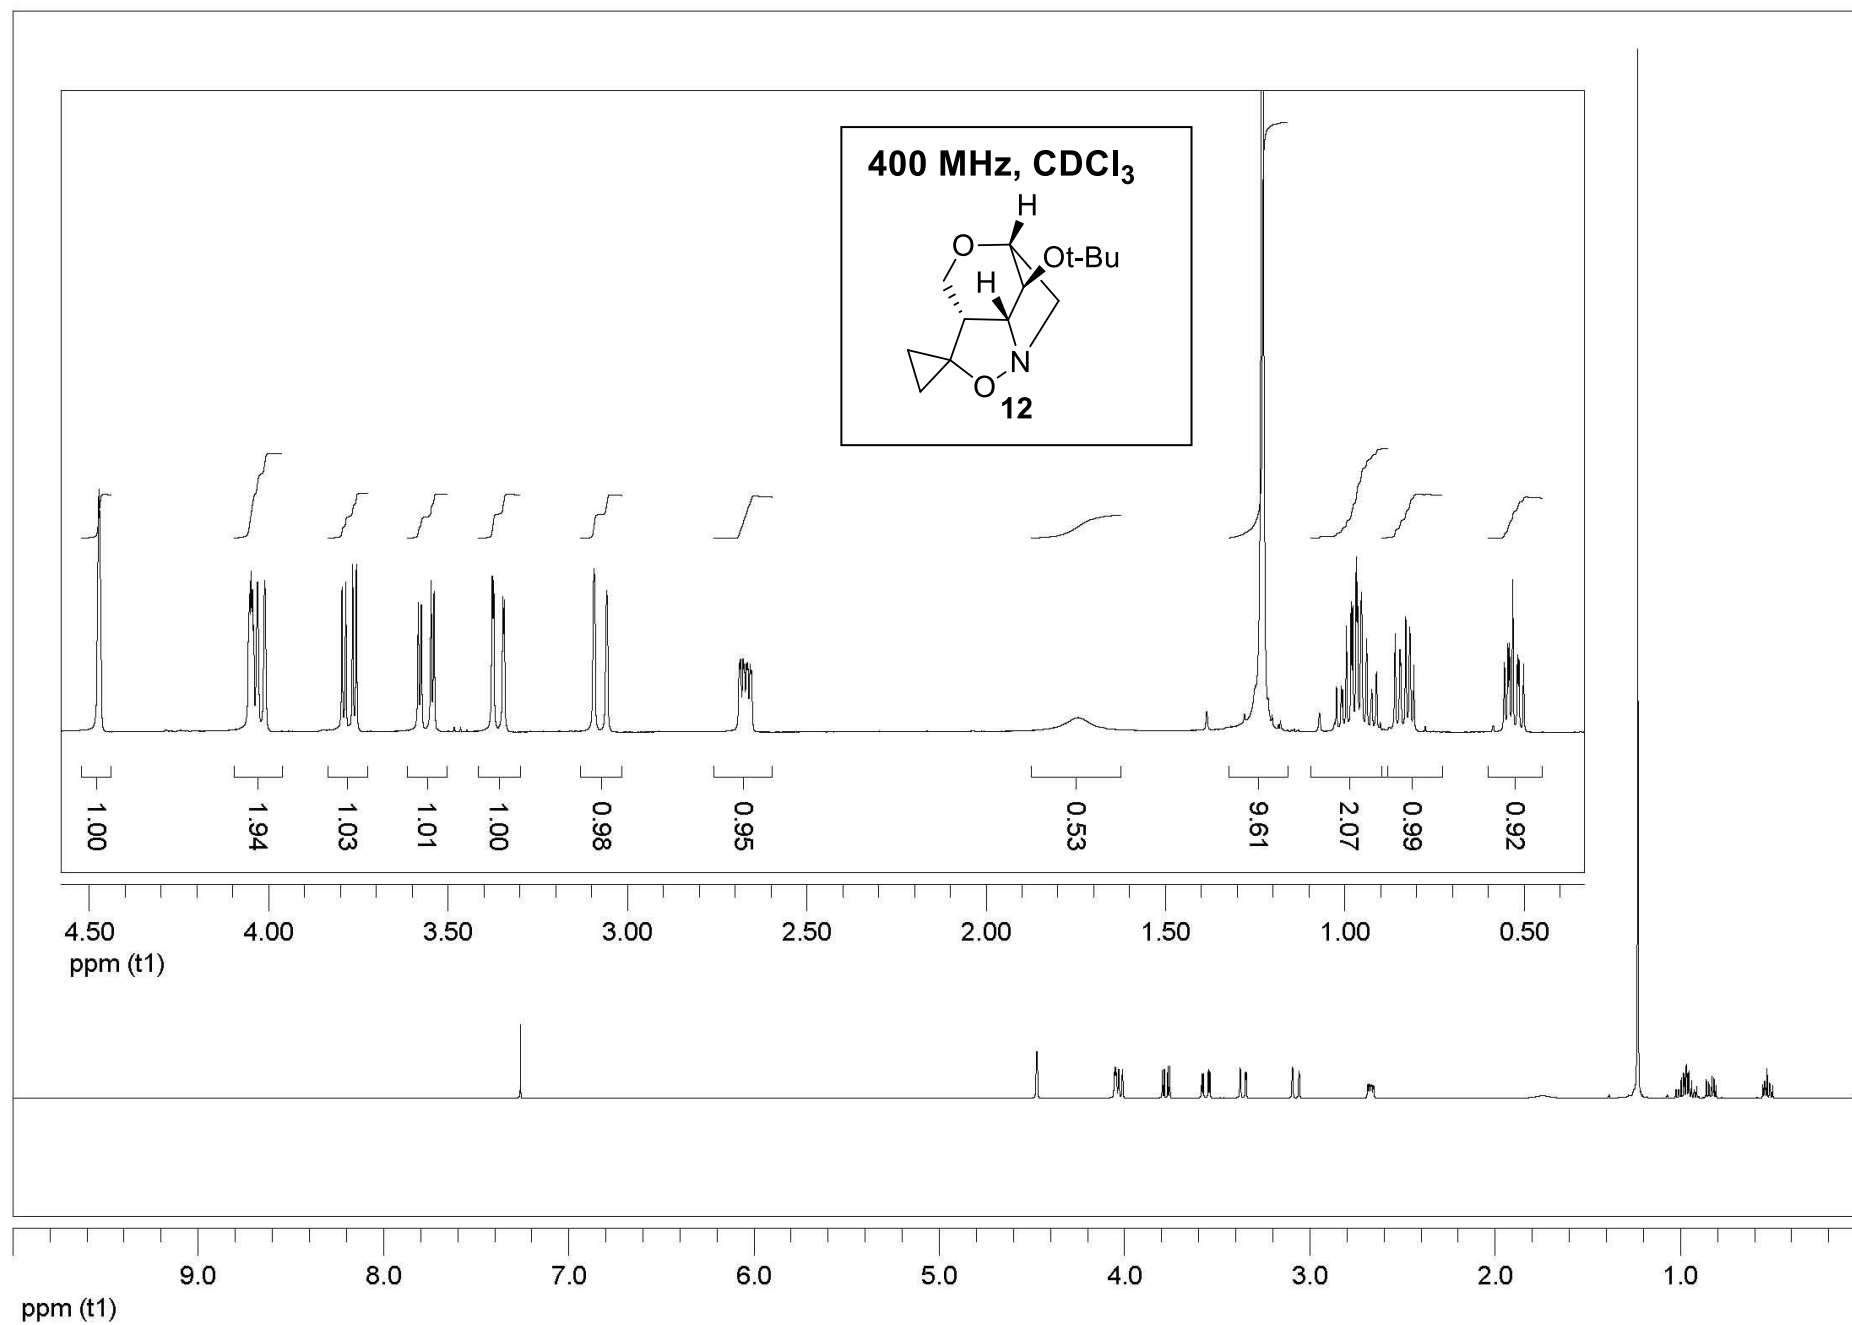

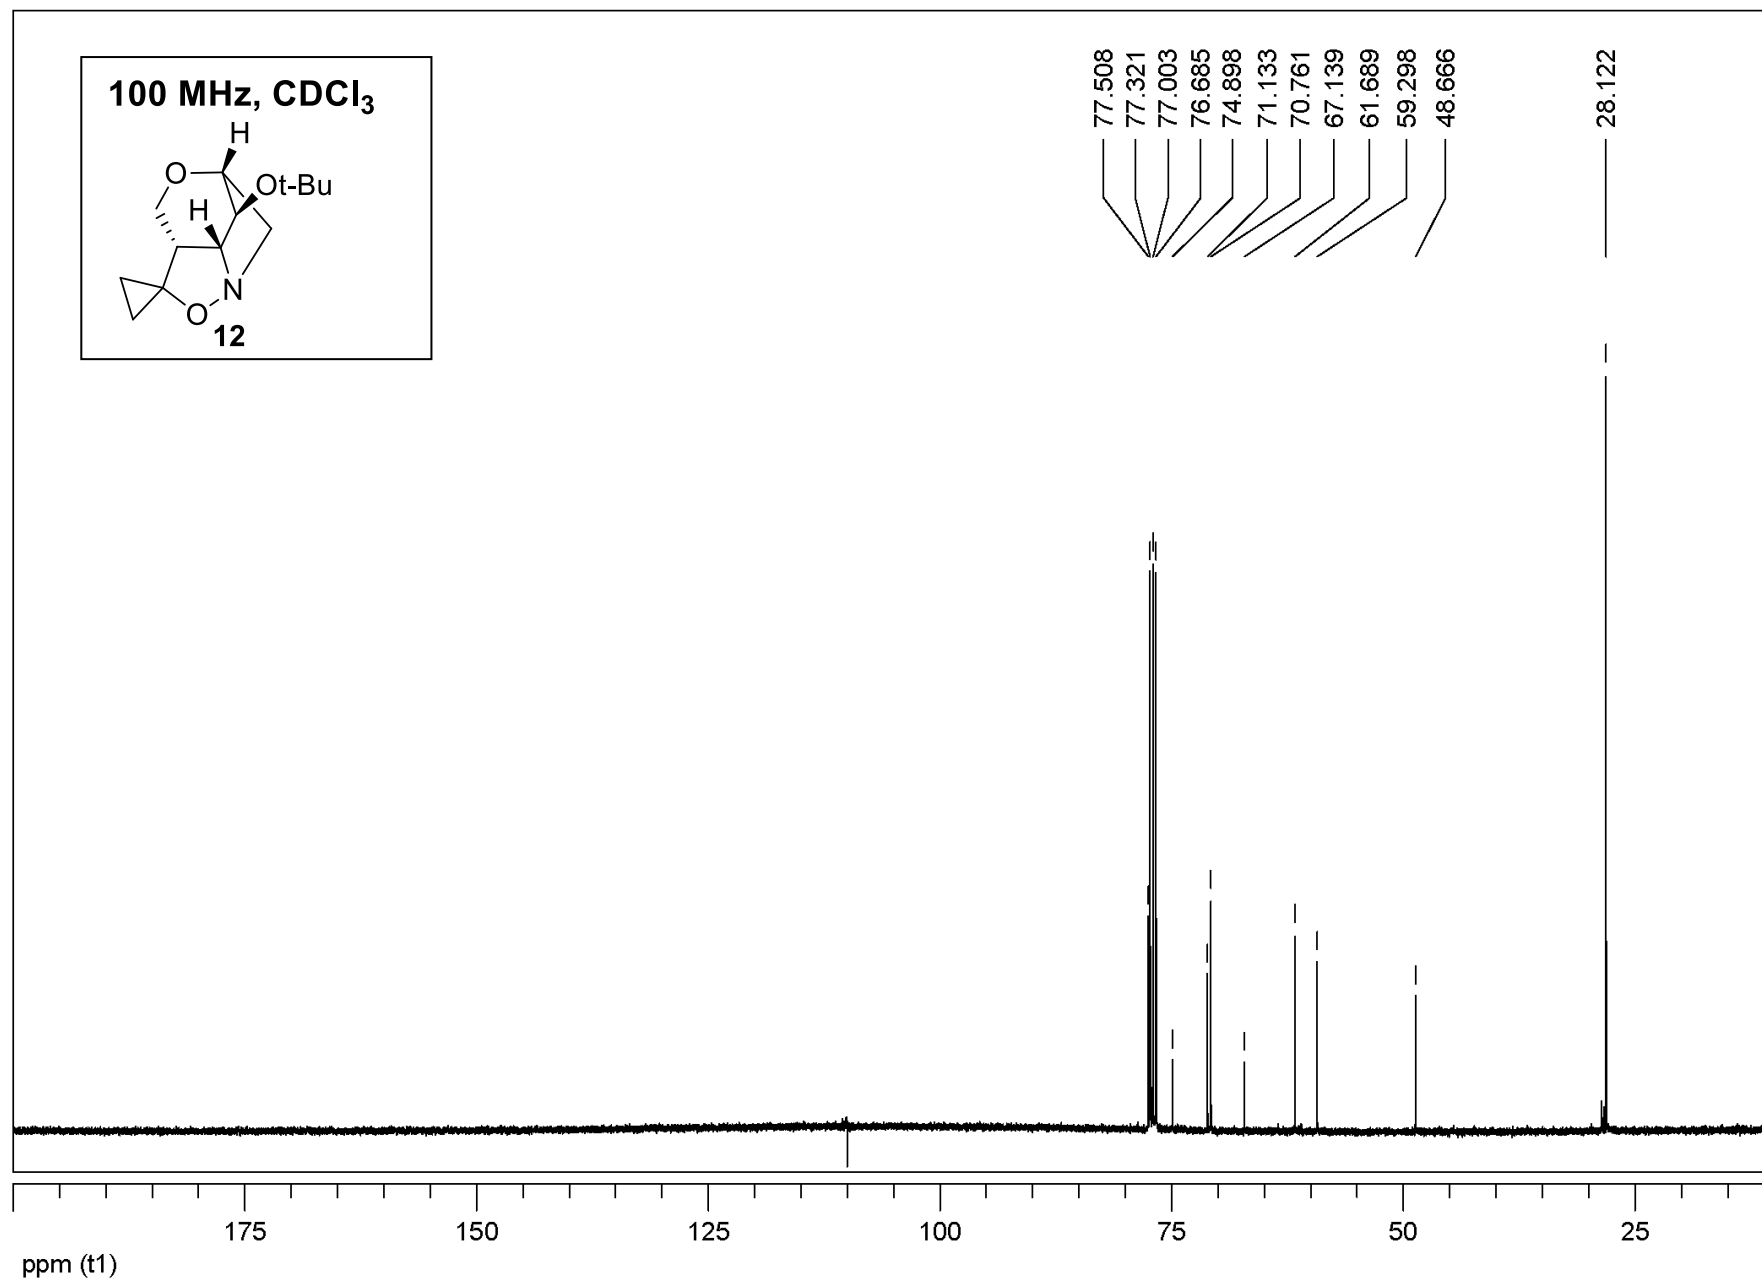

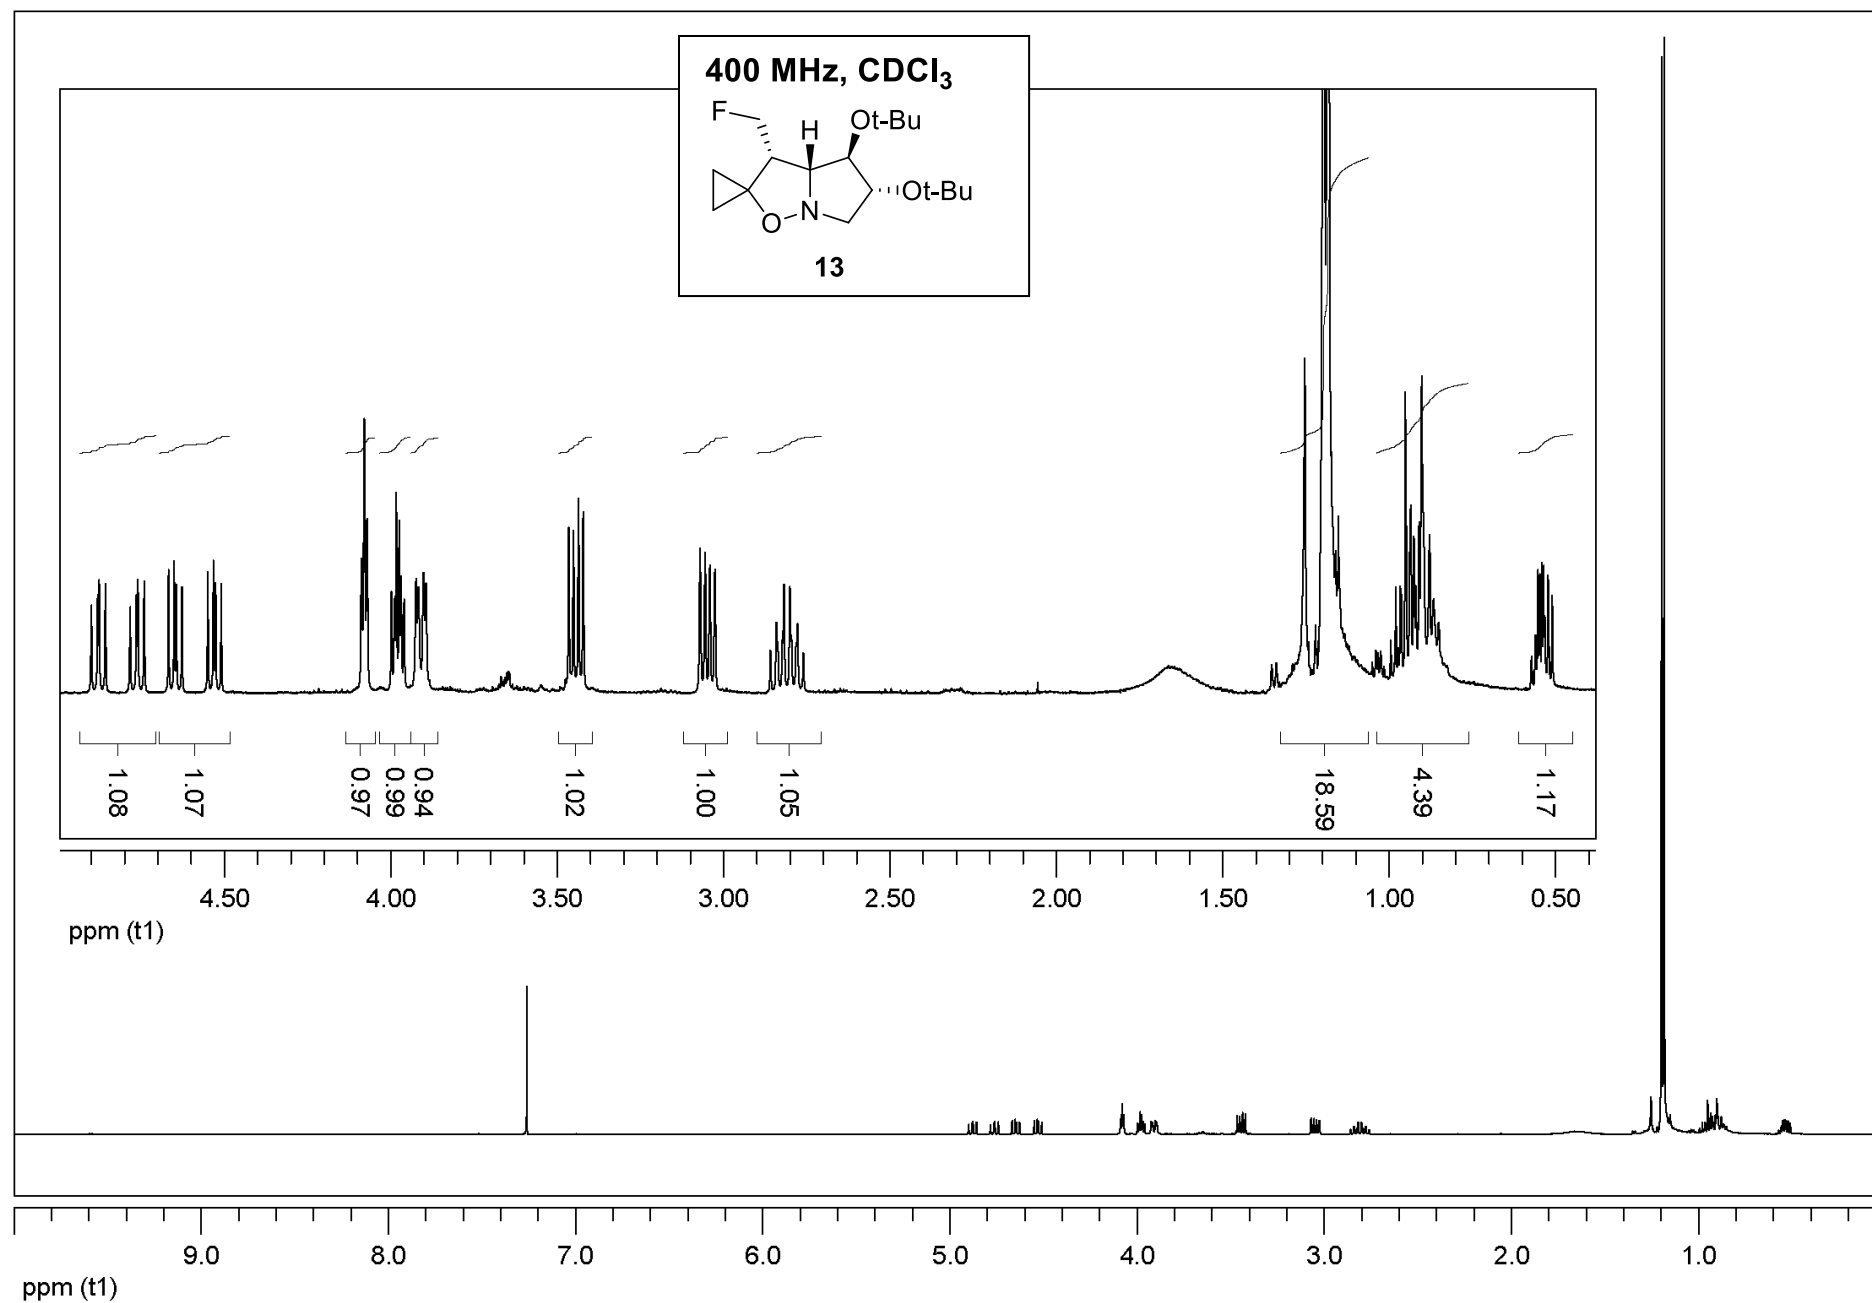

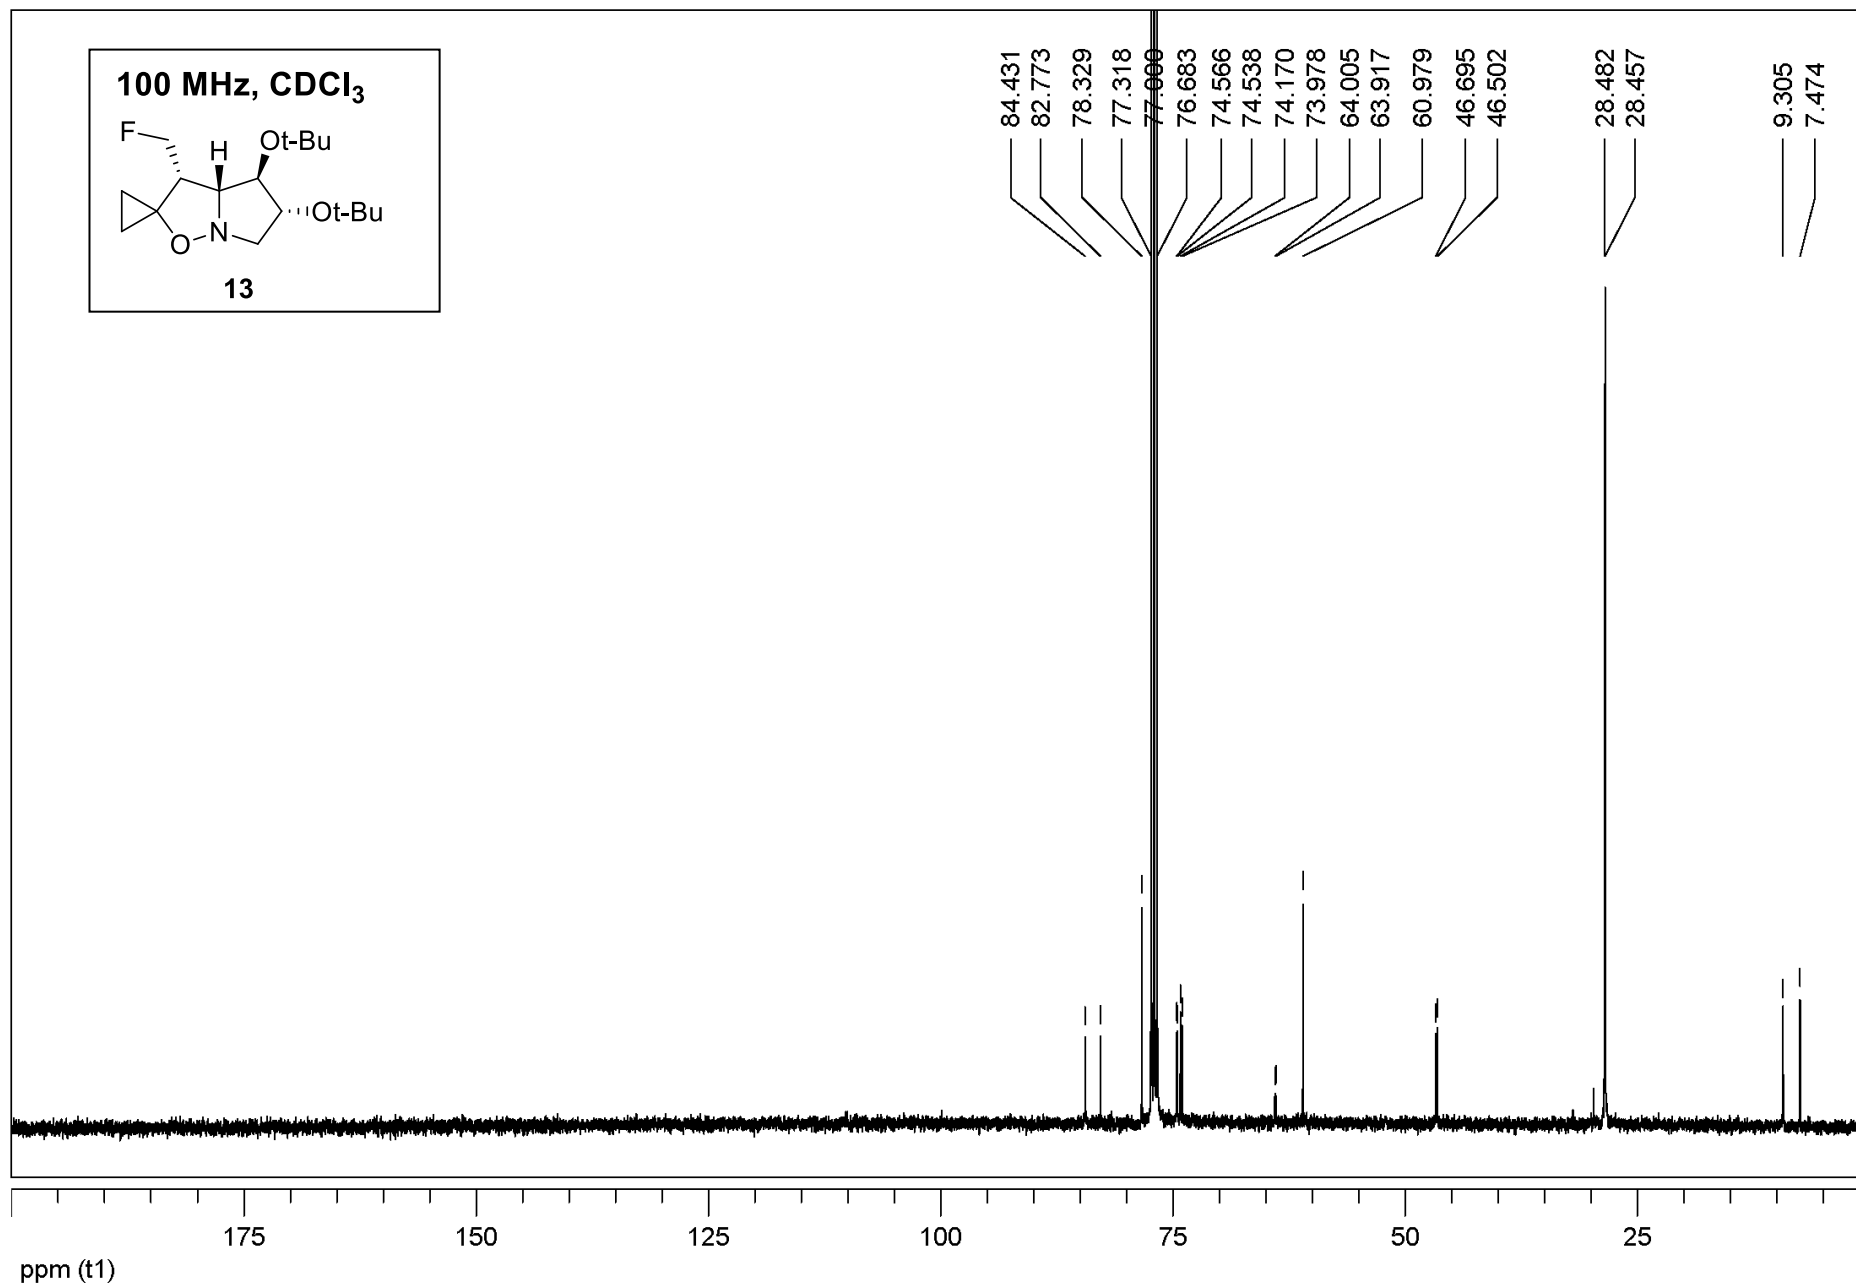

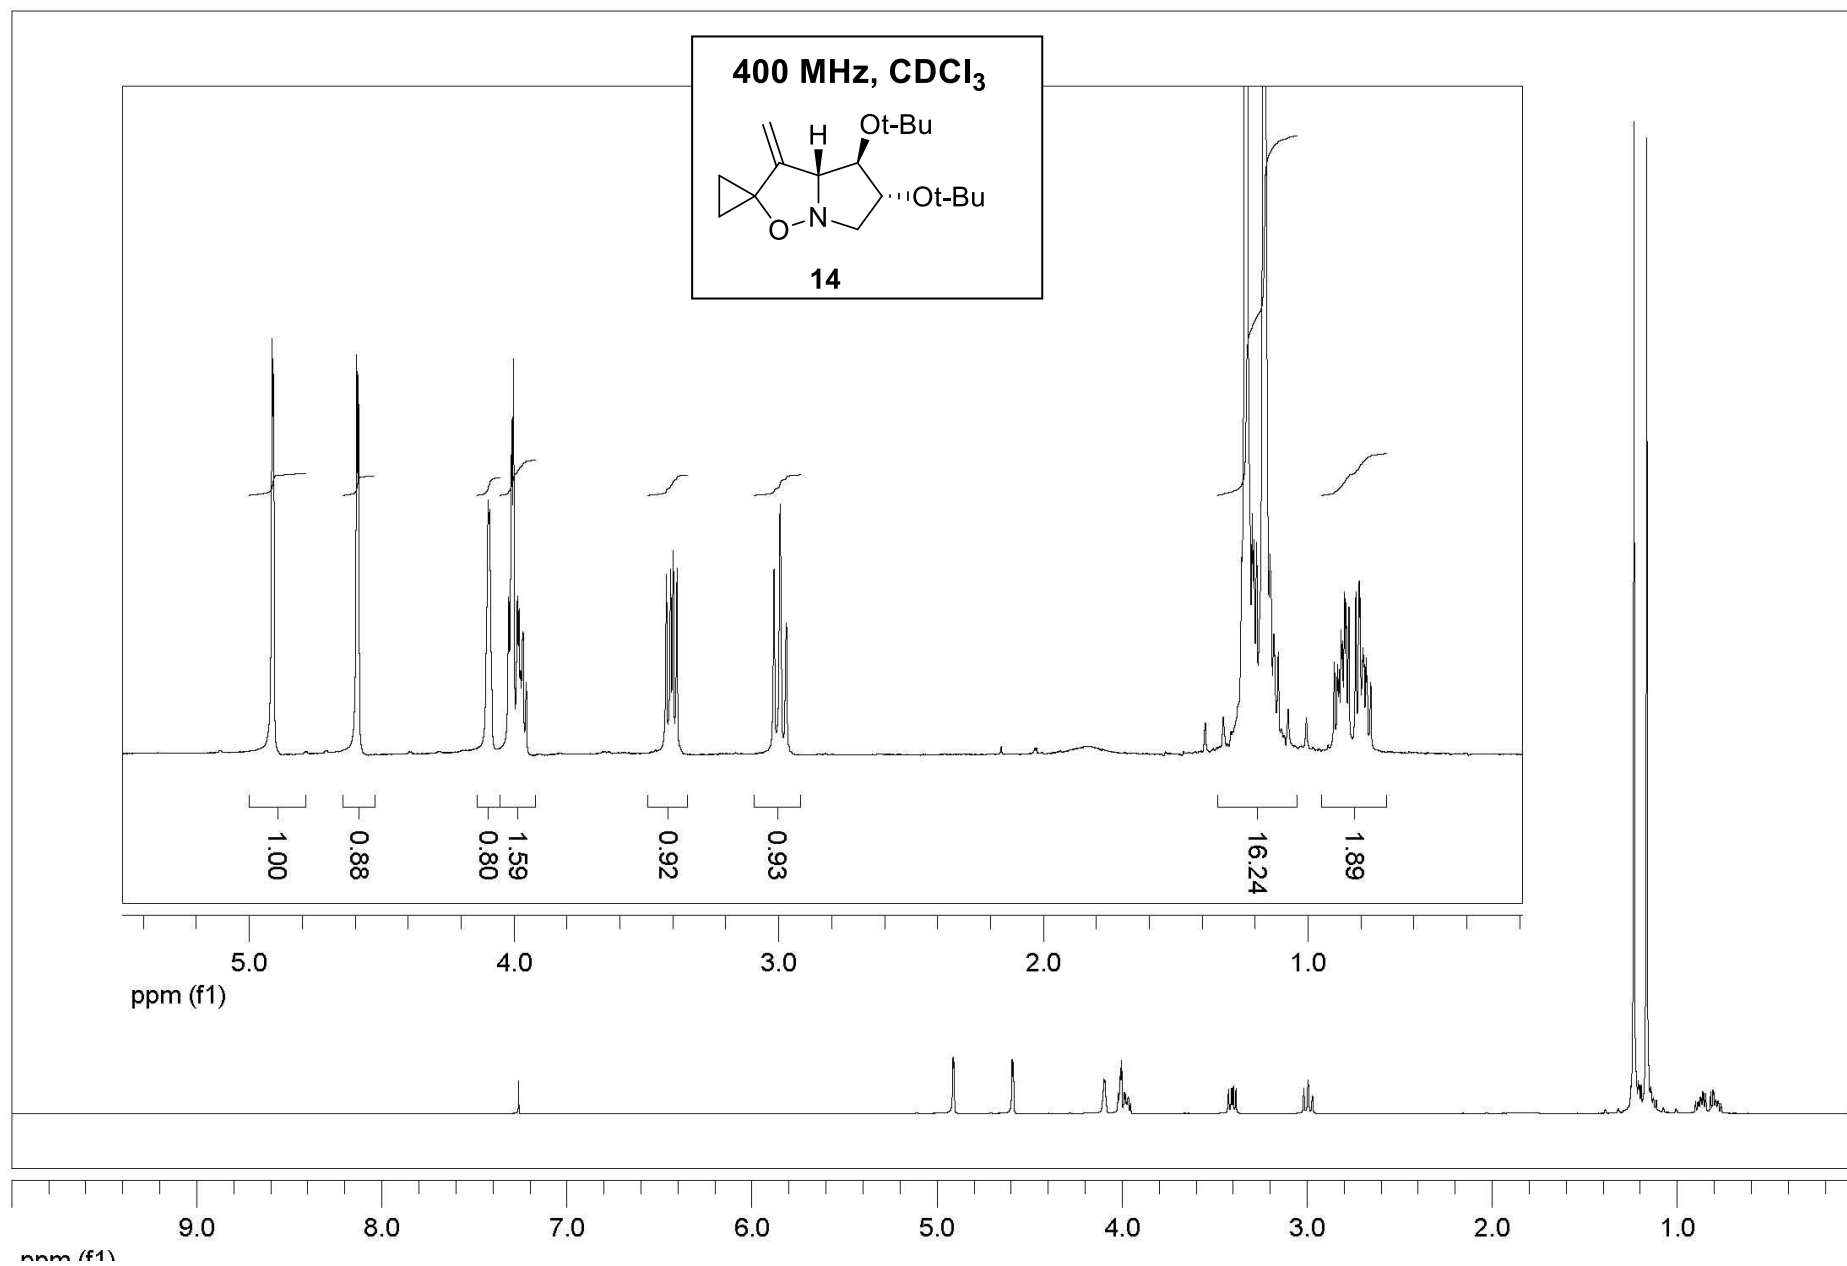

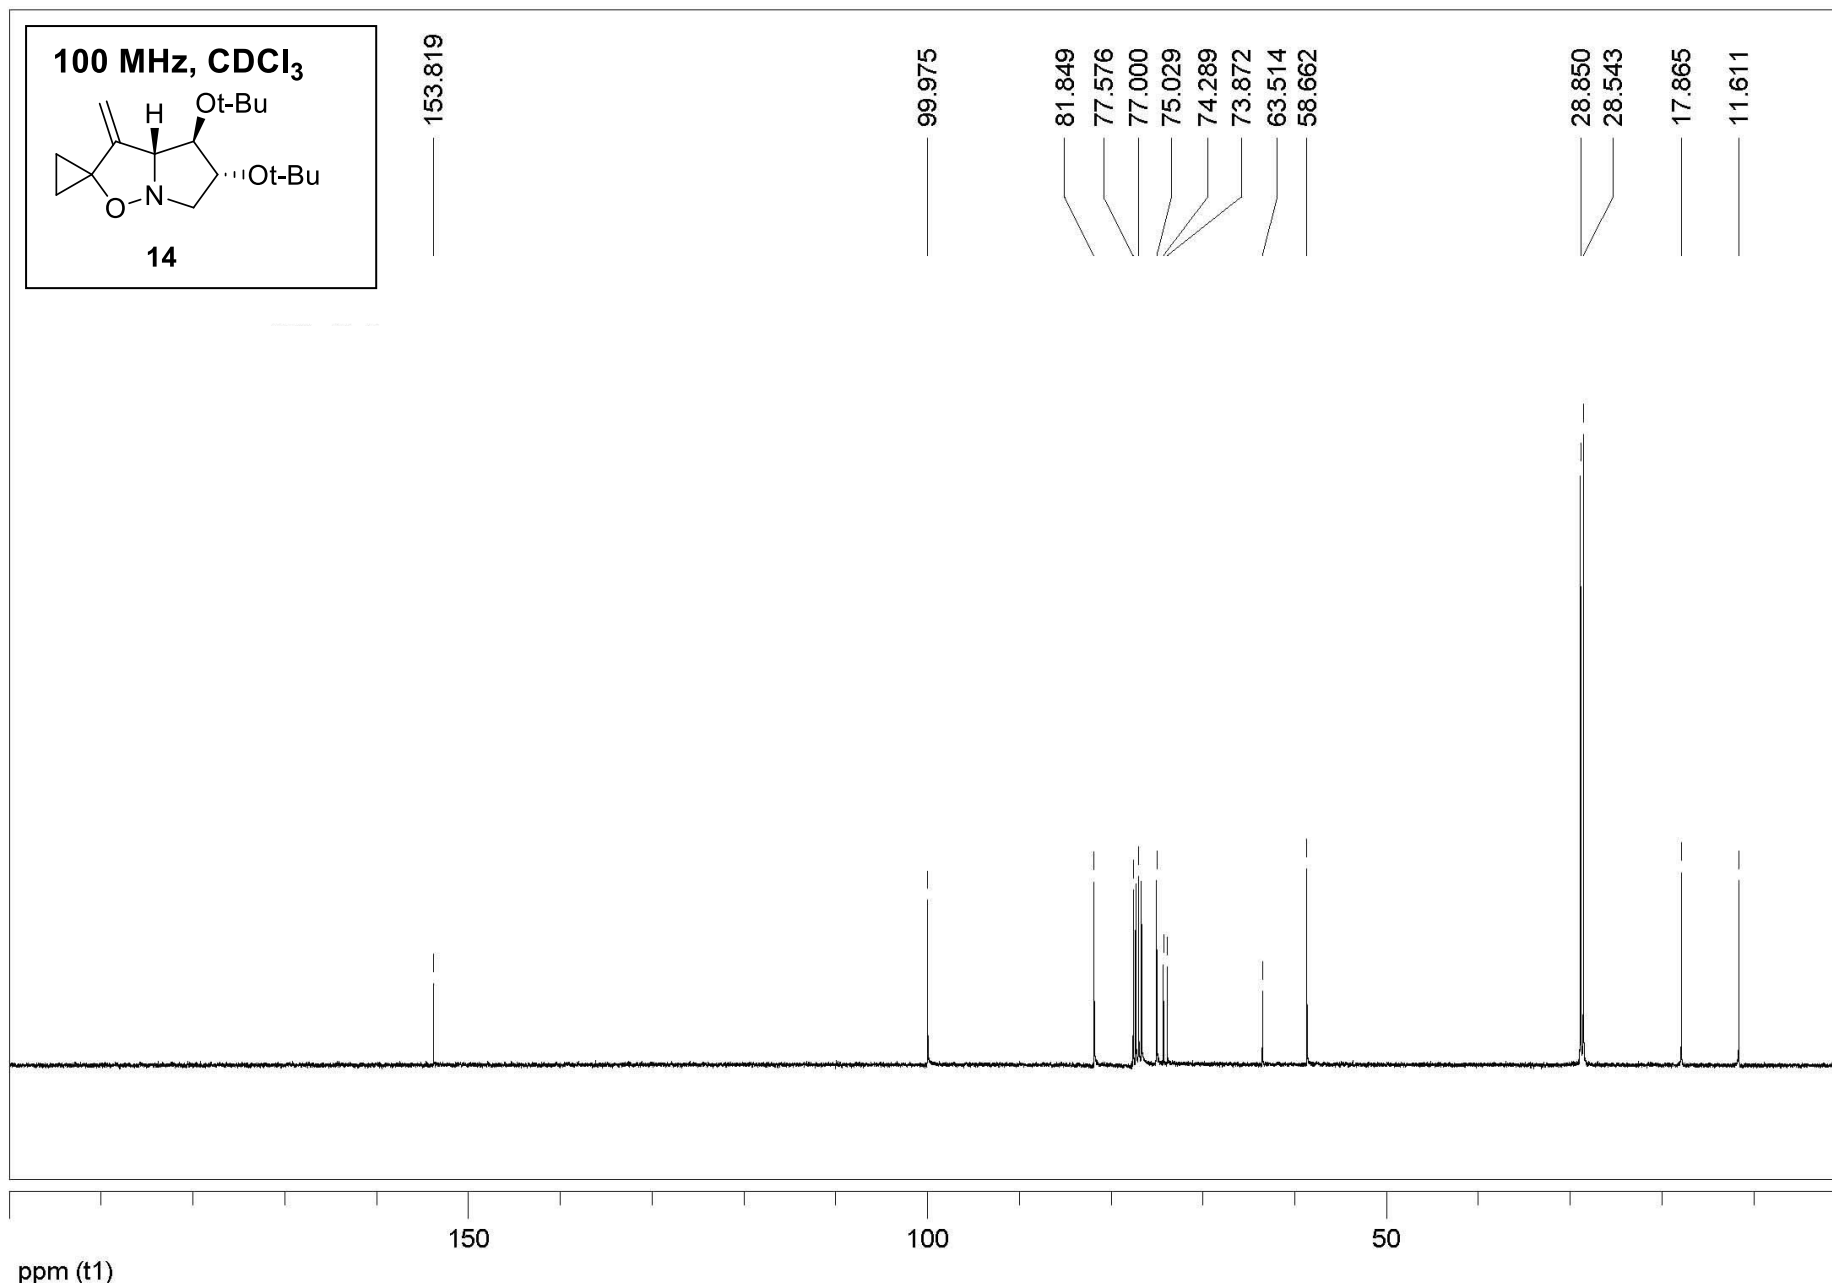

400 MHz, CDCl<sub>3</sub>

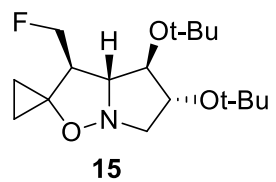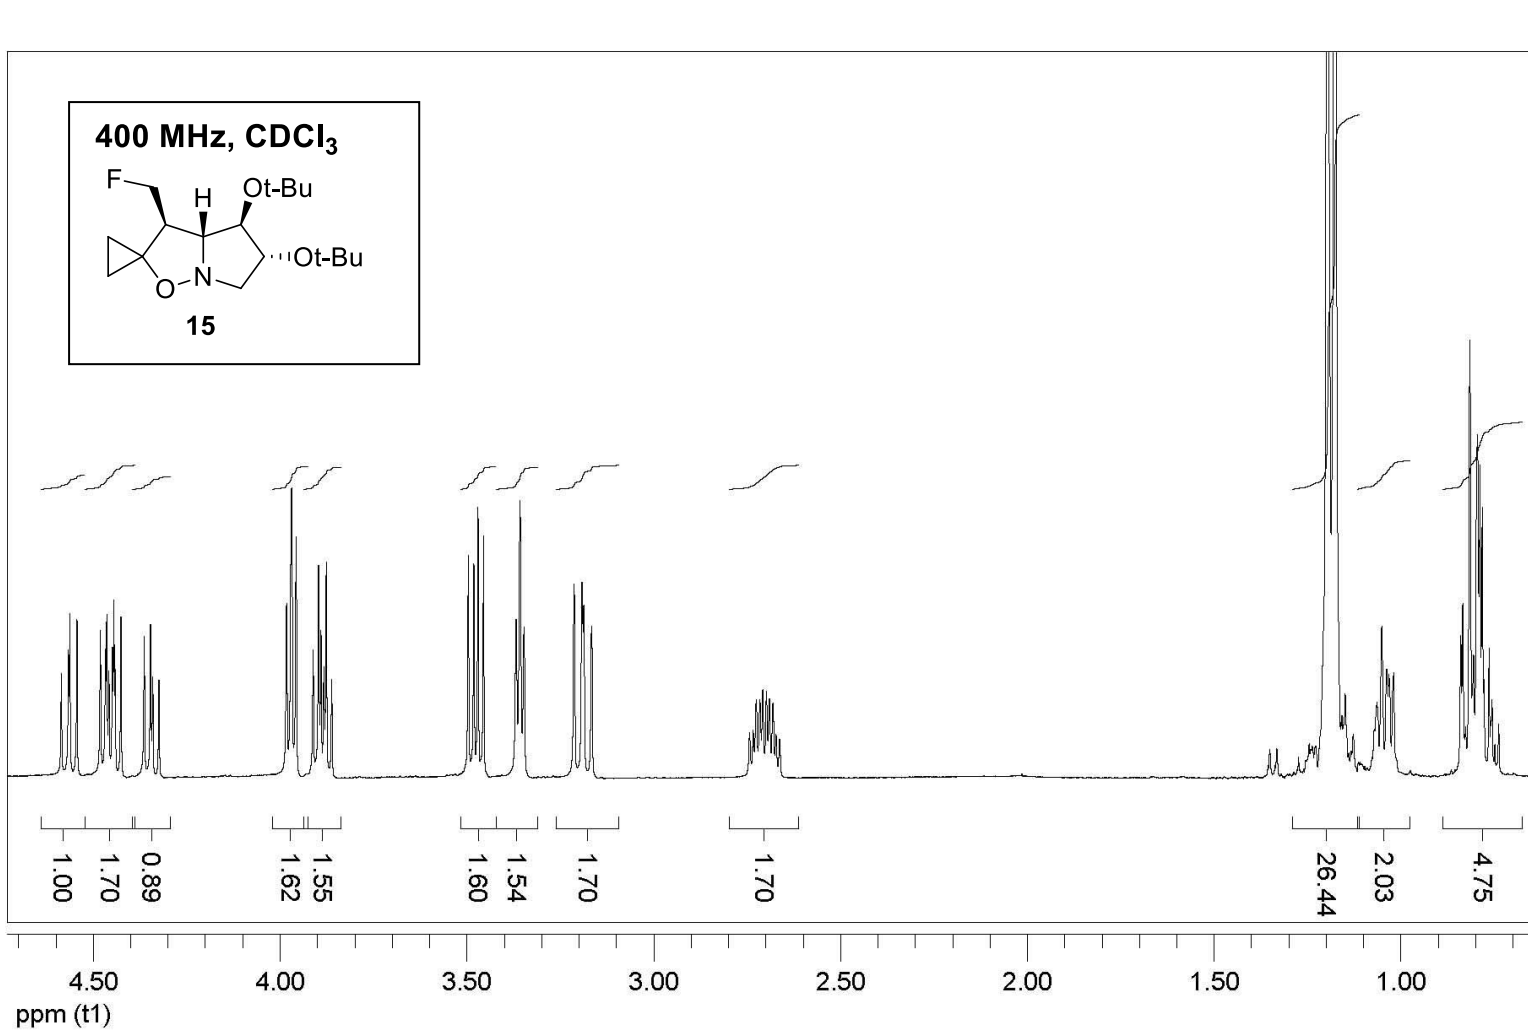

ppm (t1)

5.0

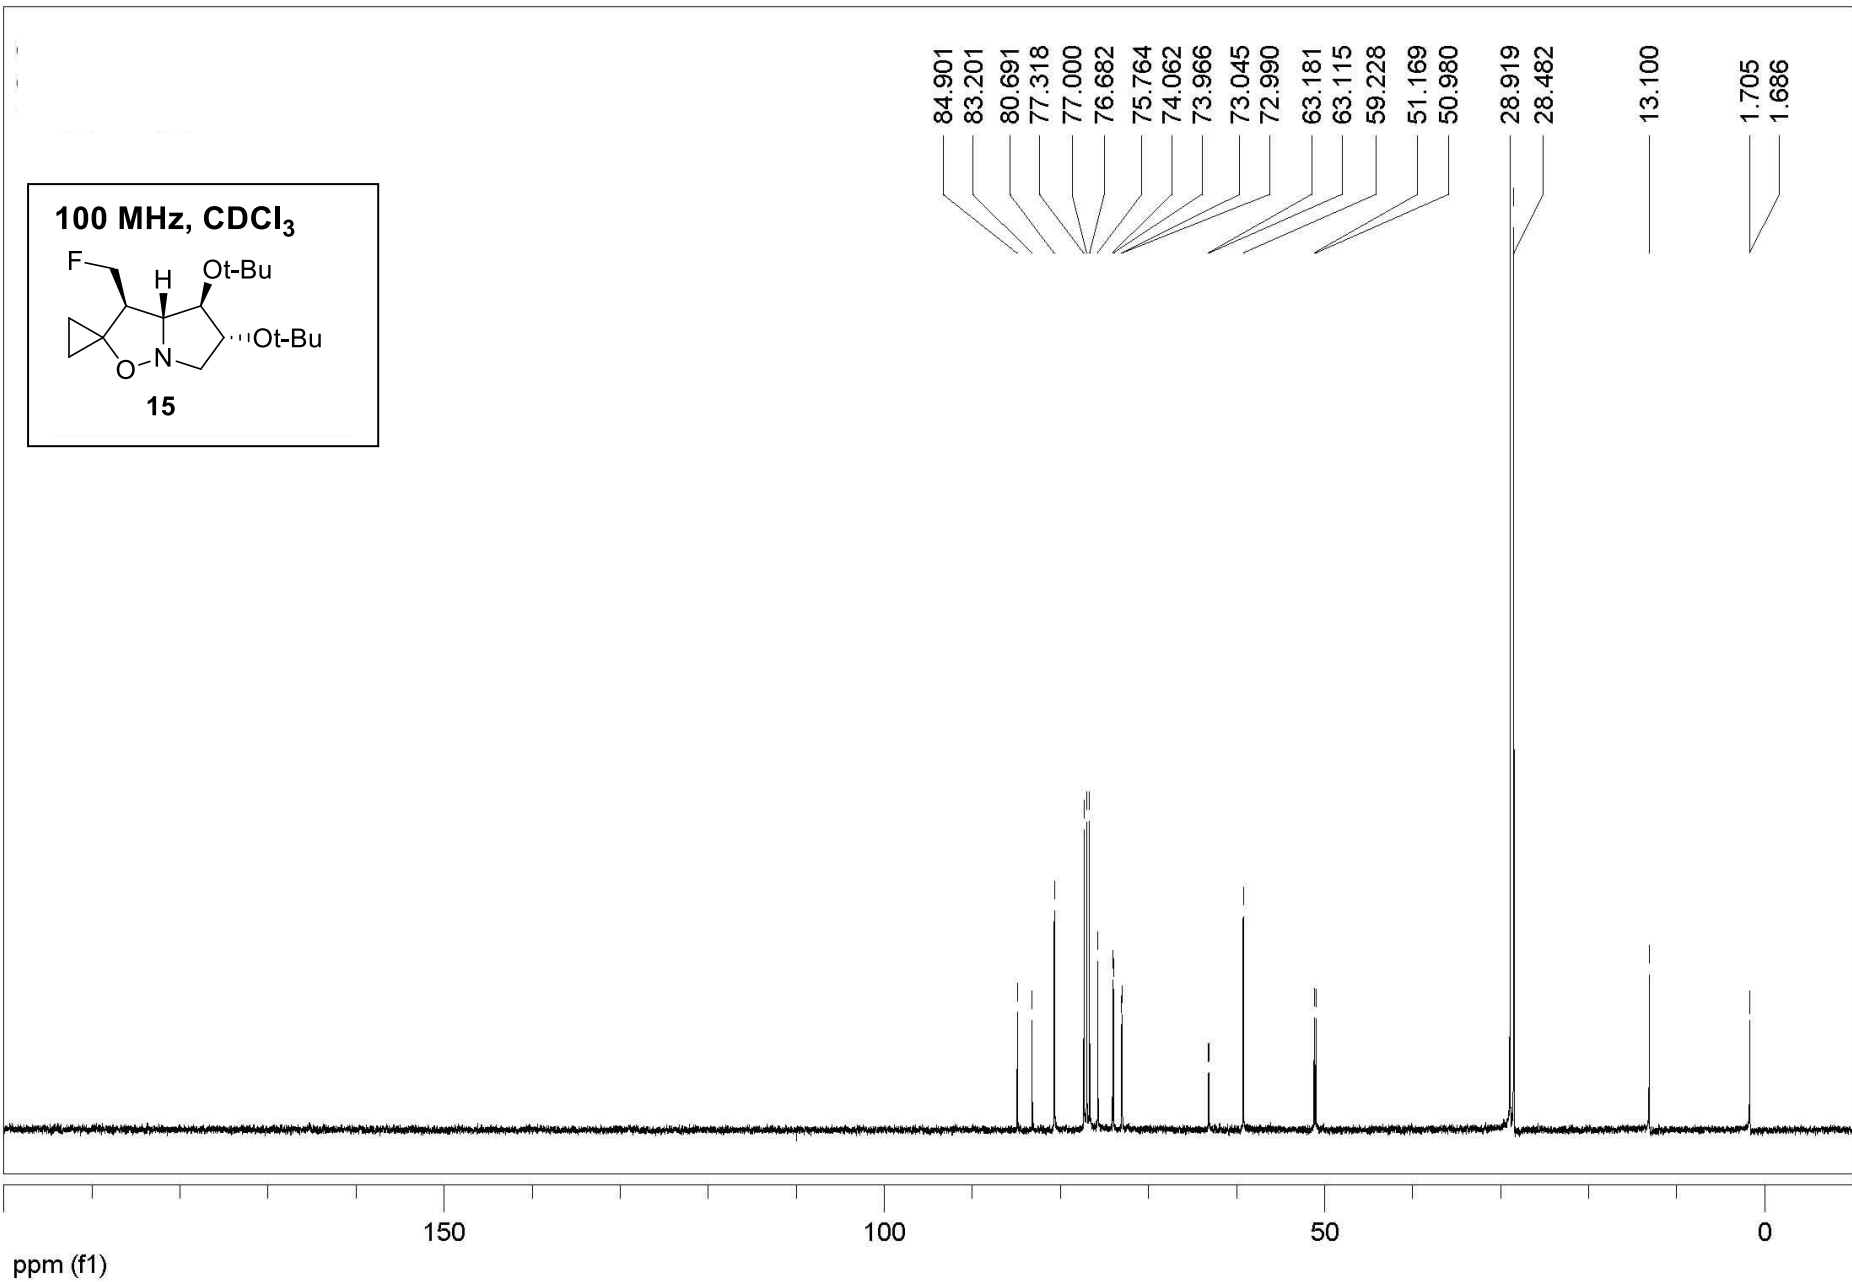

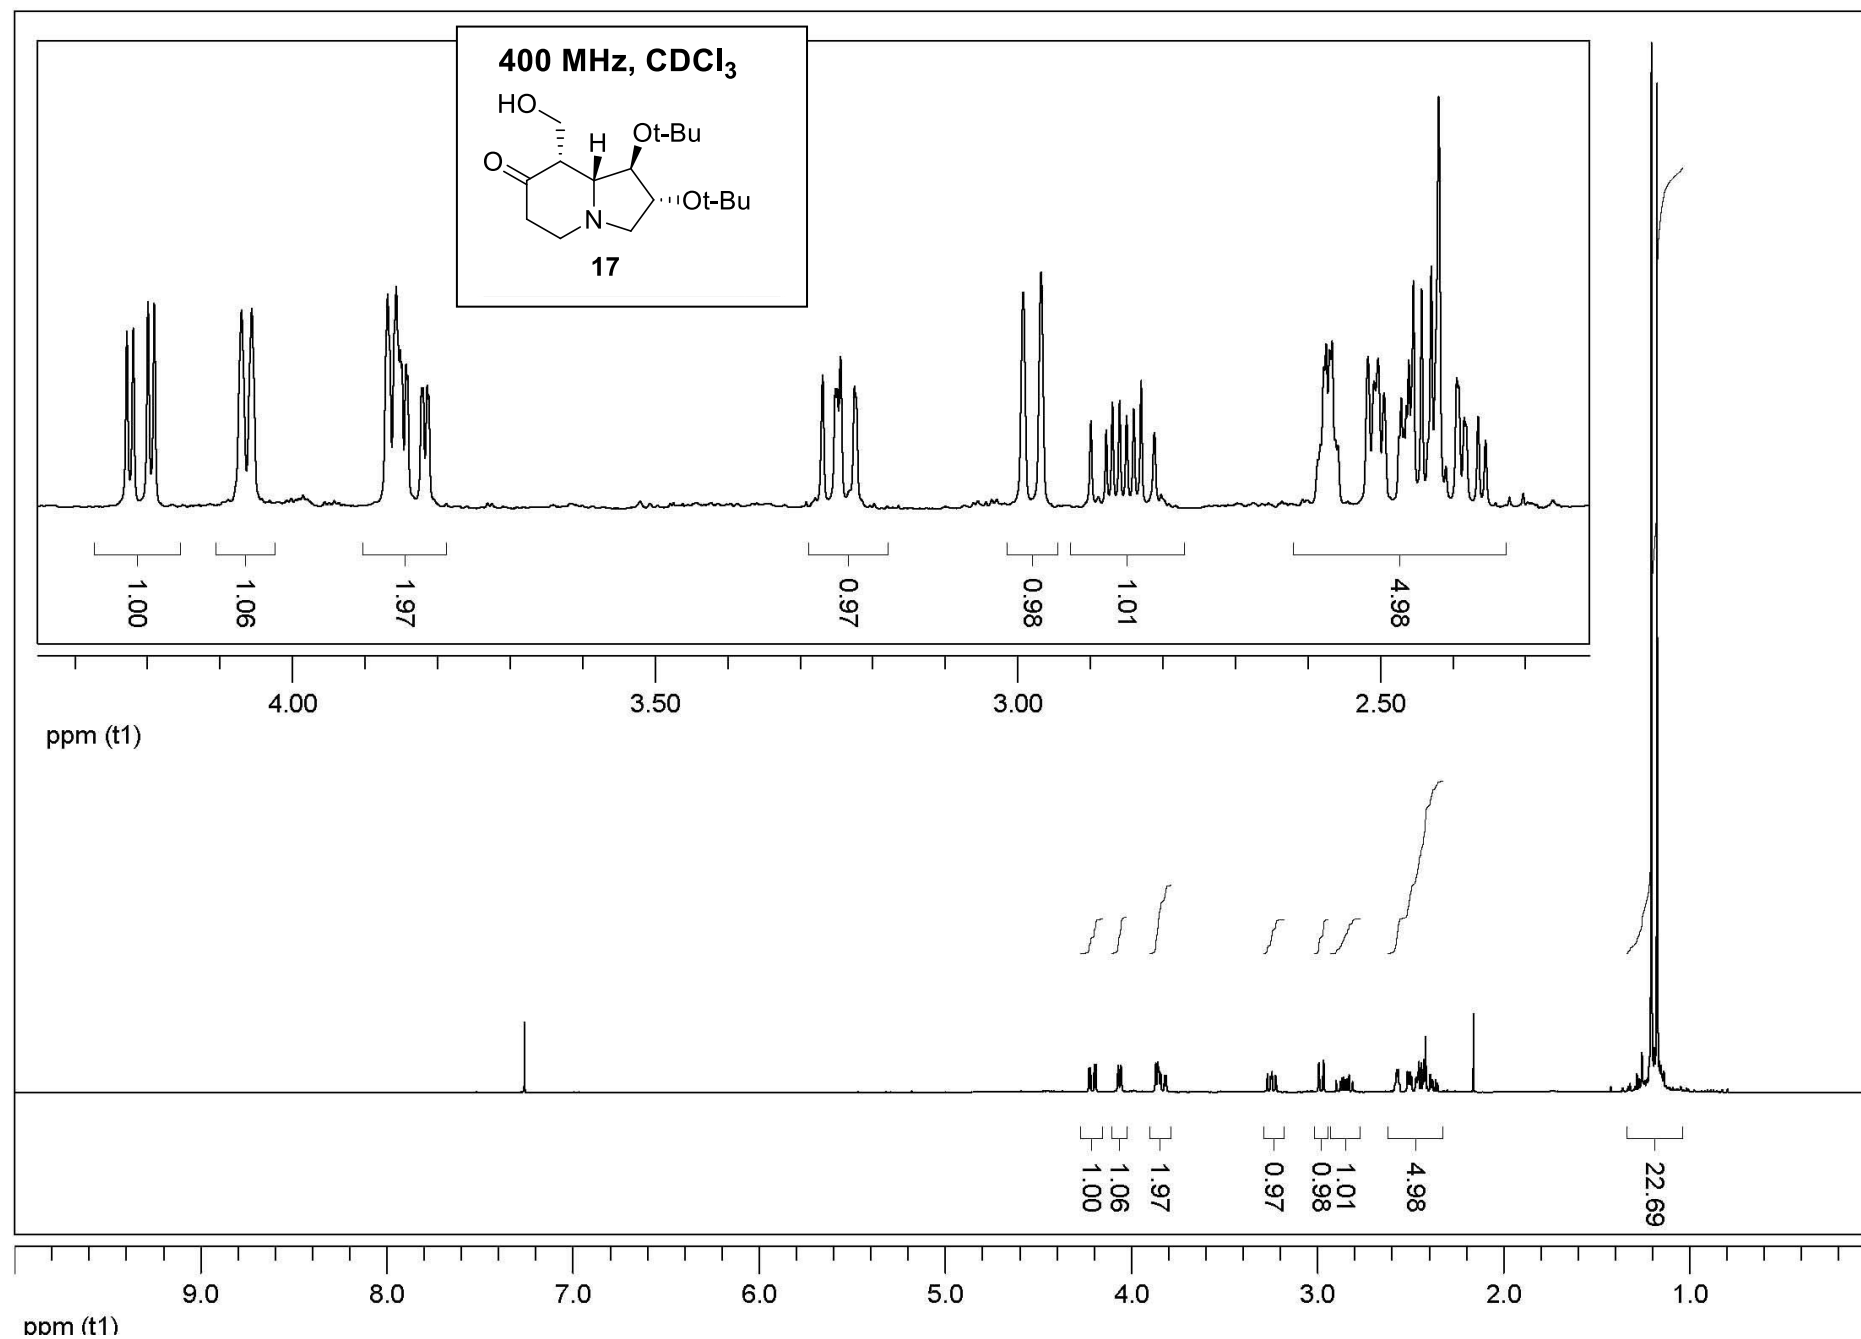

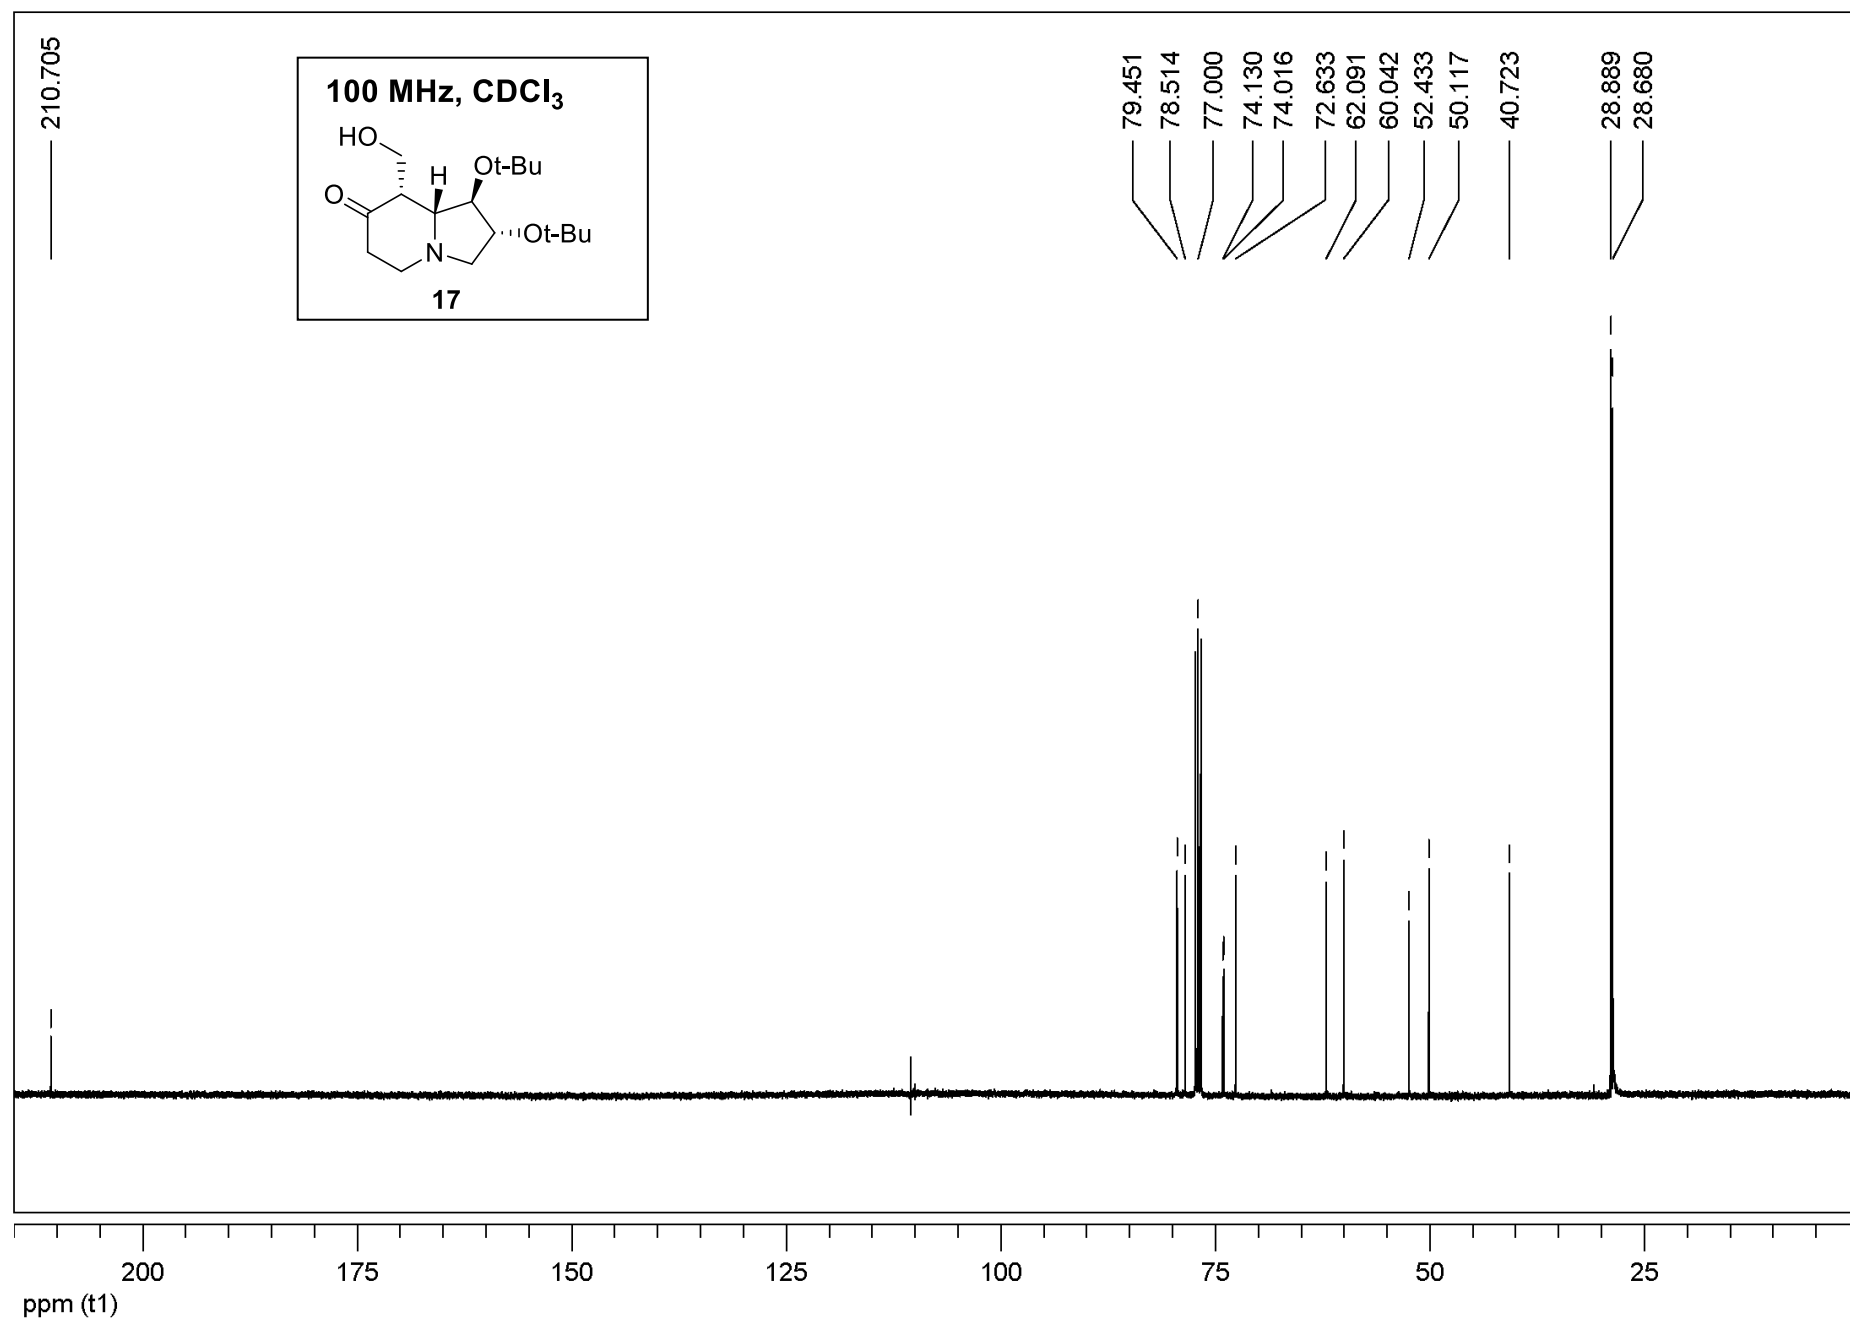

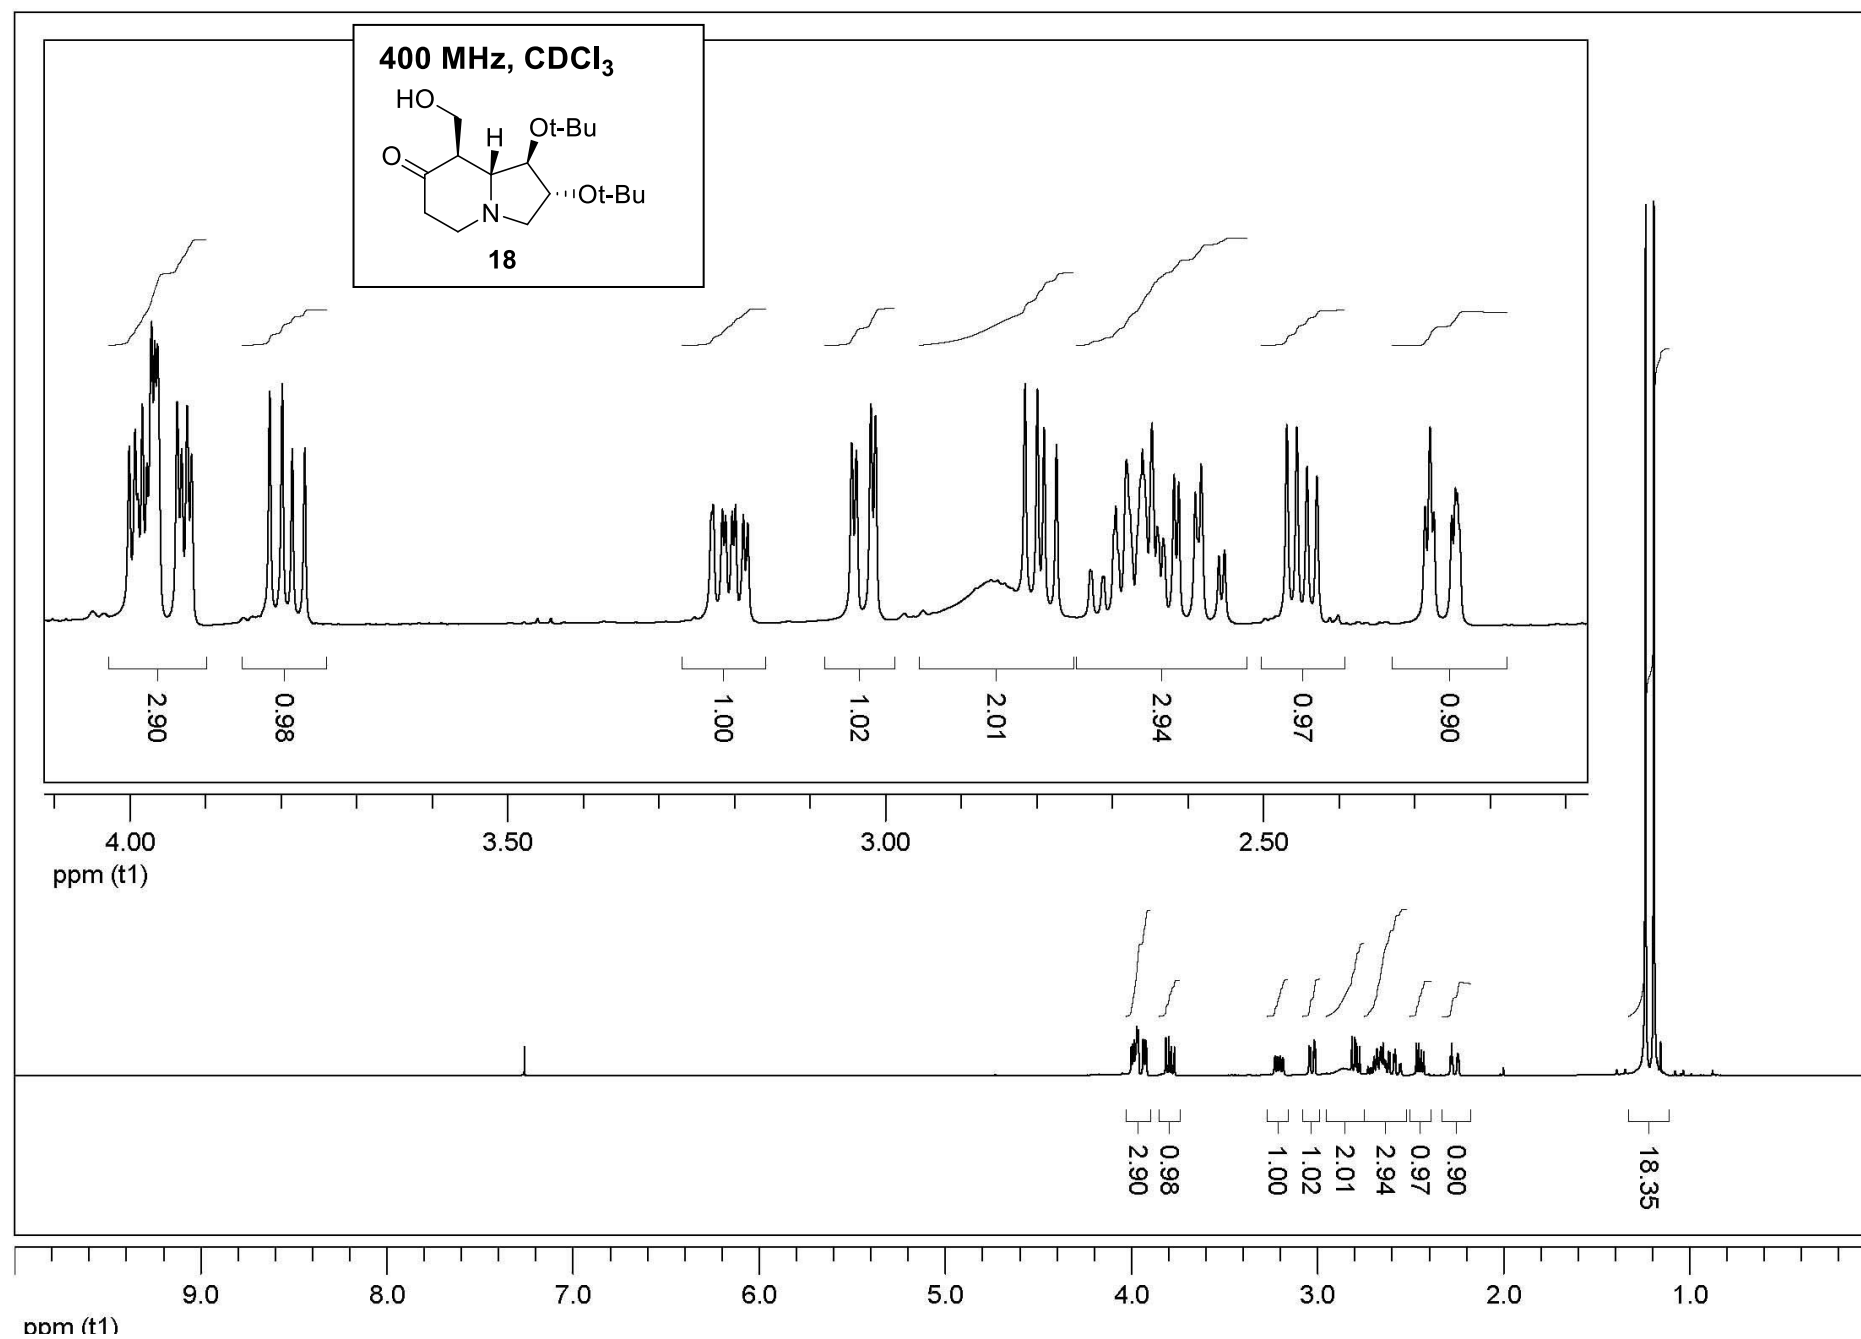

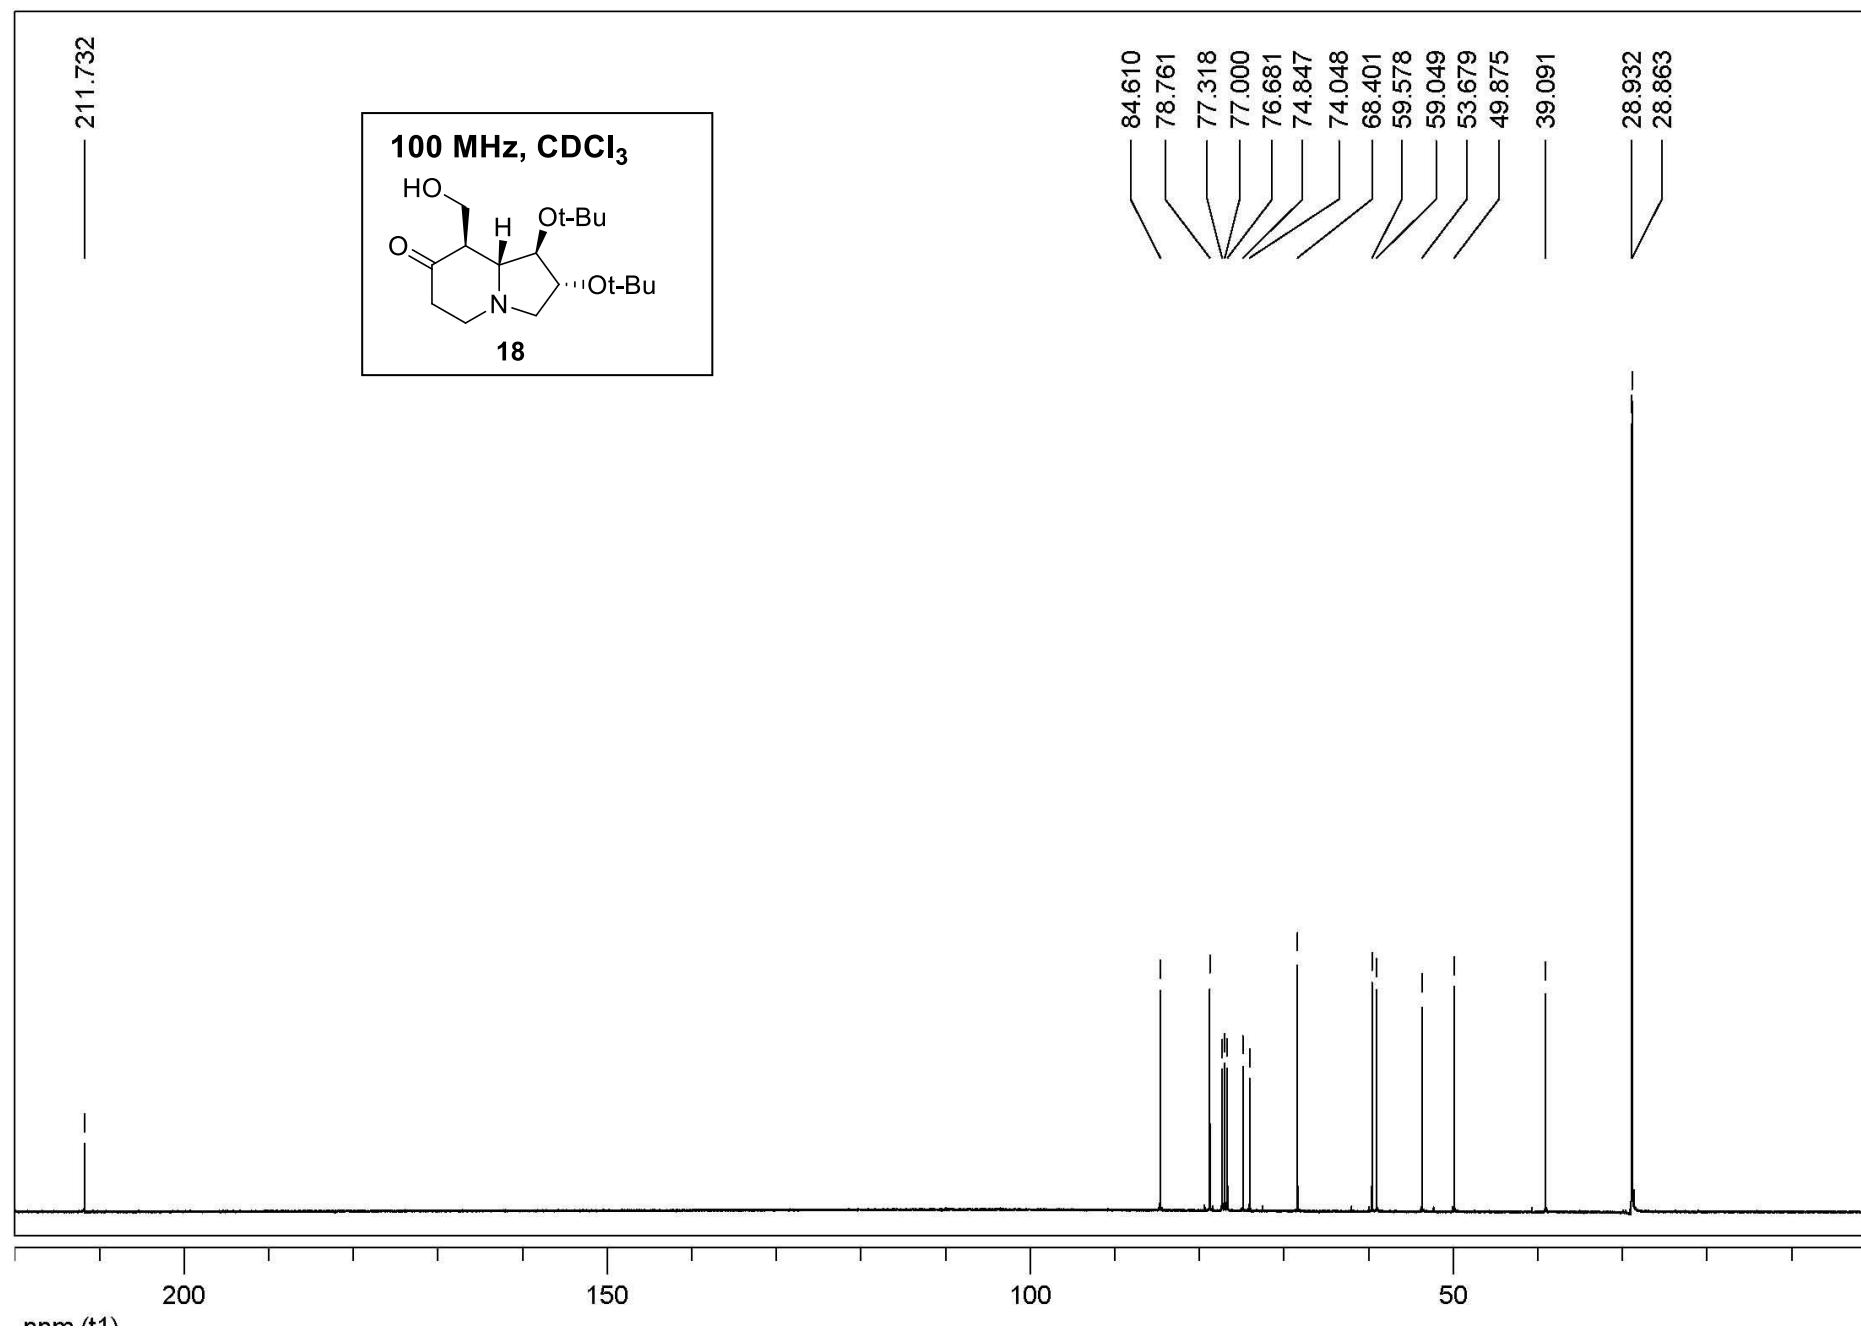

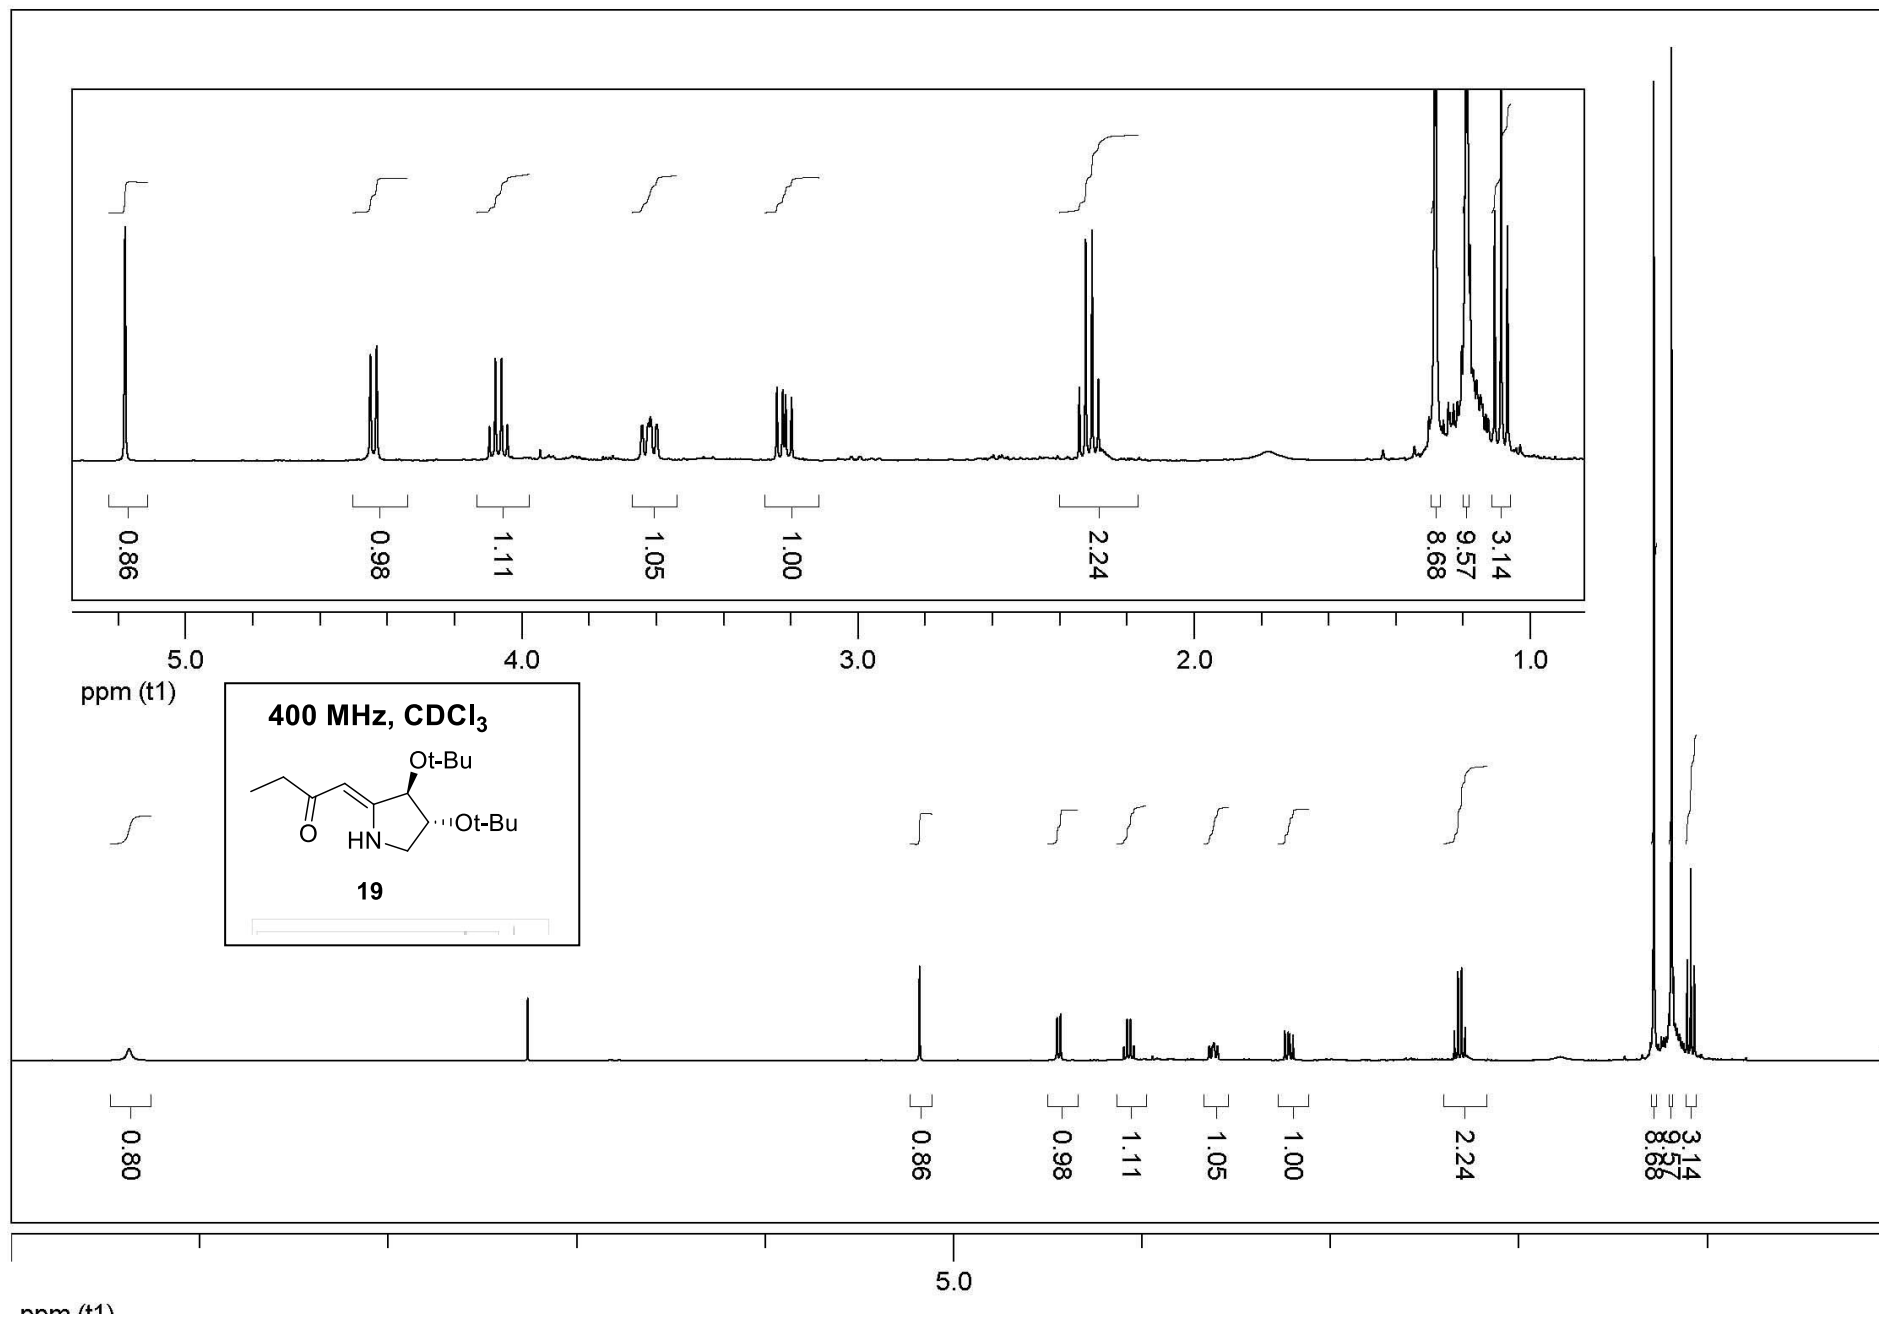

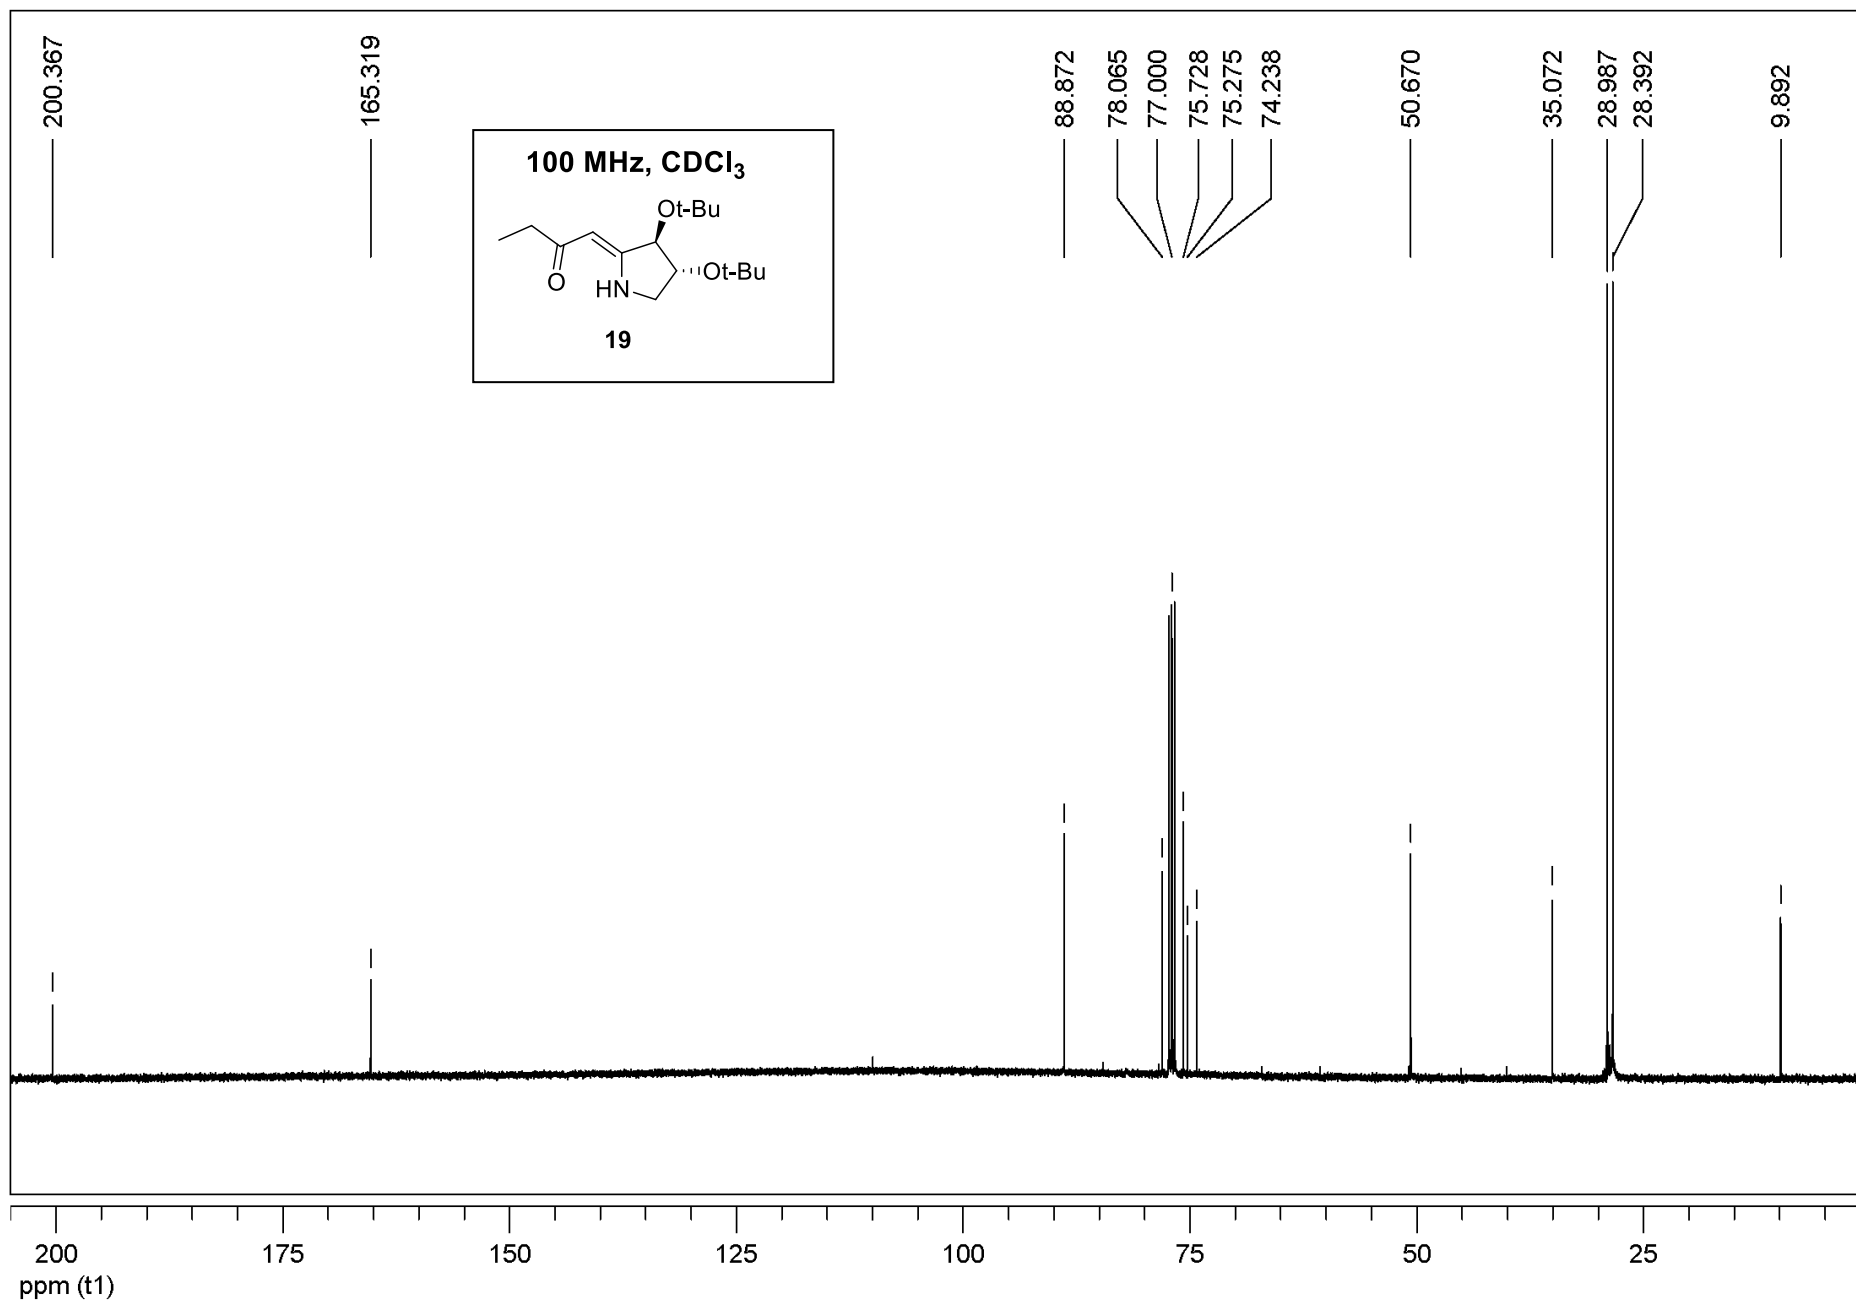

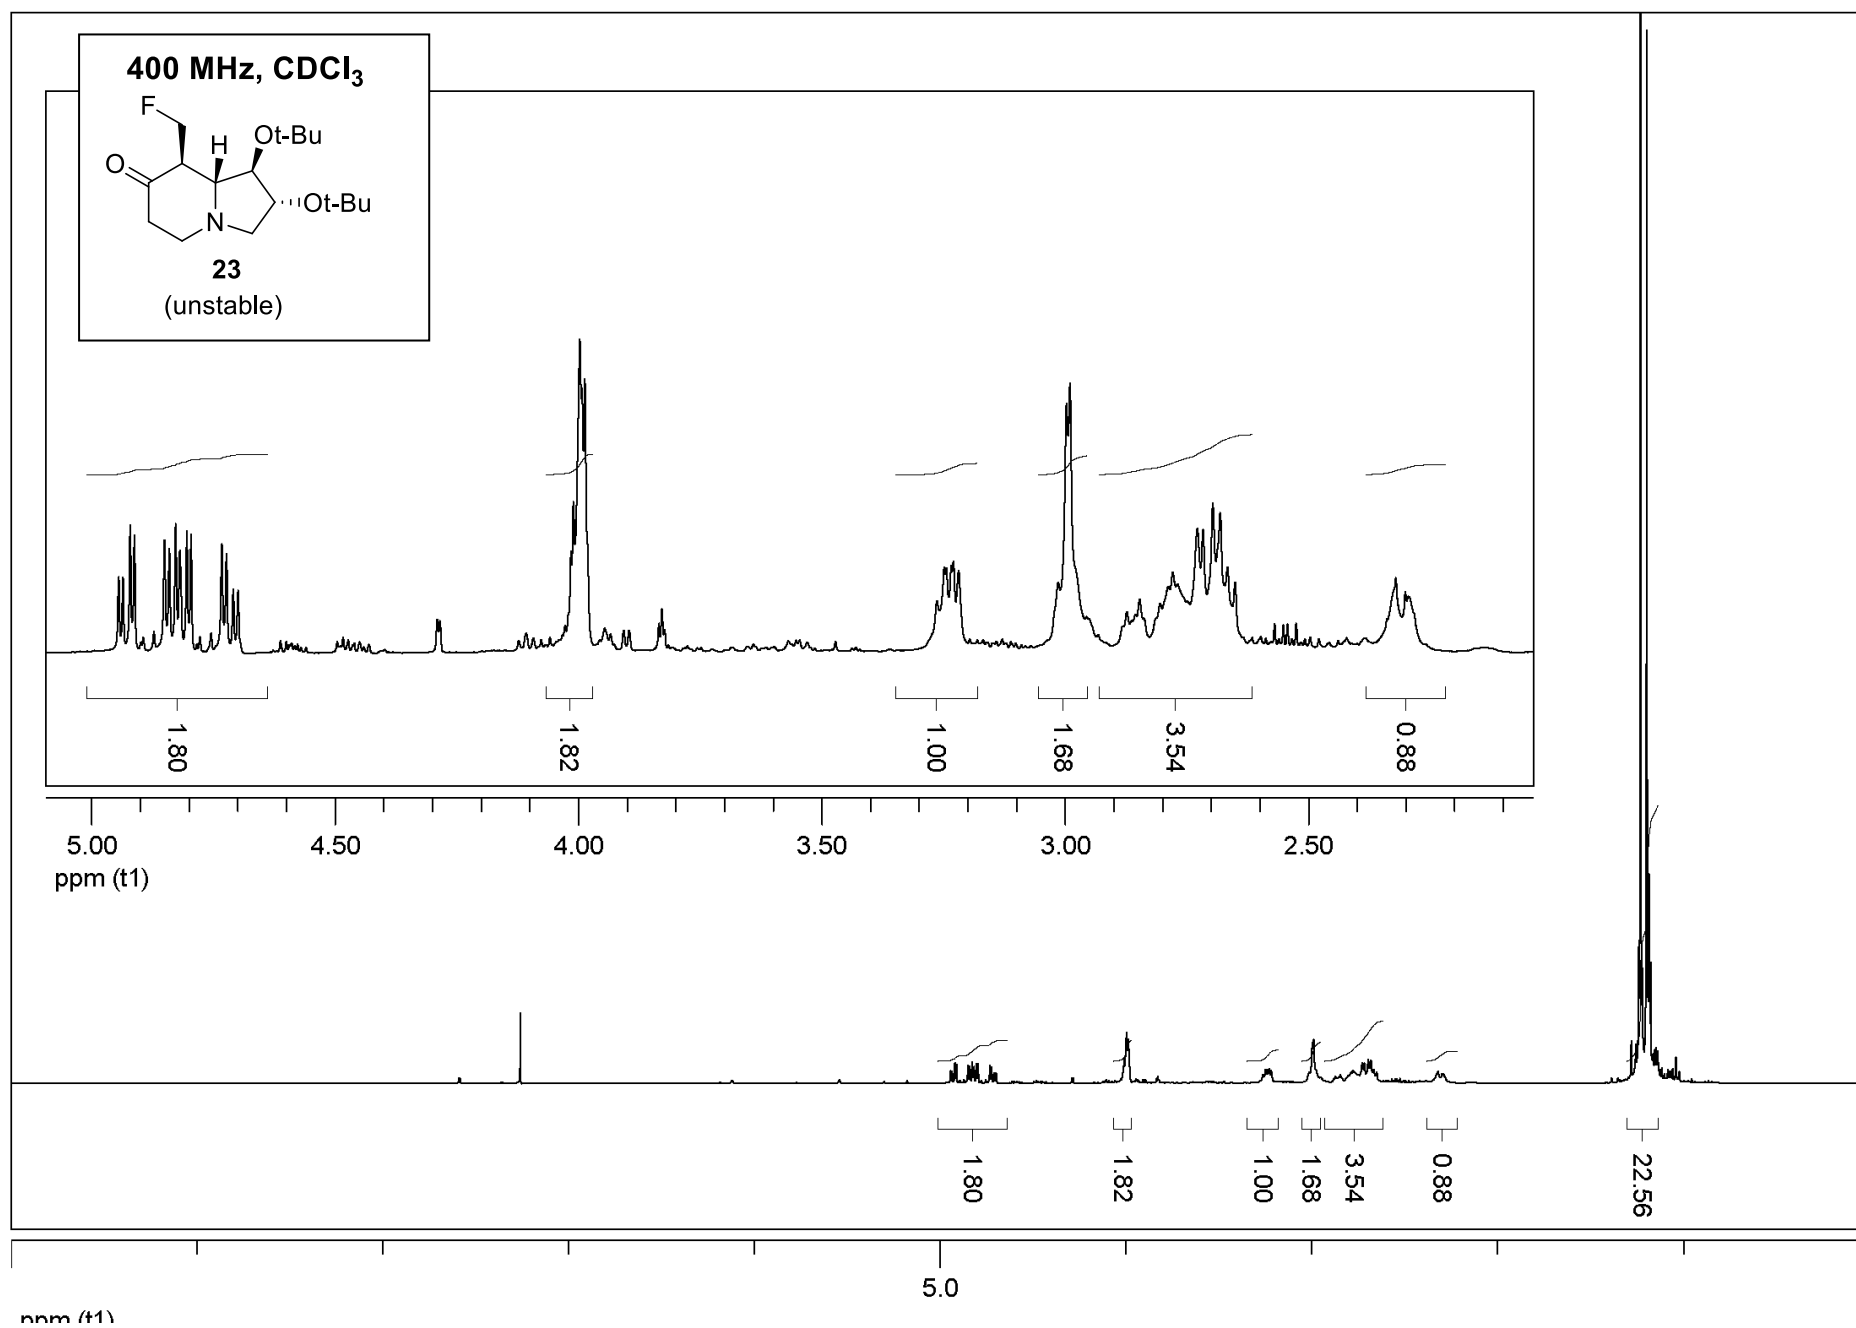

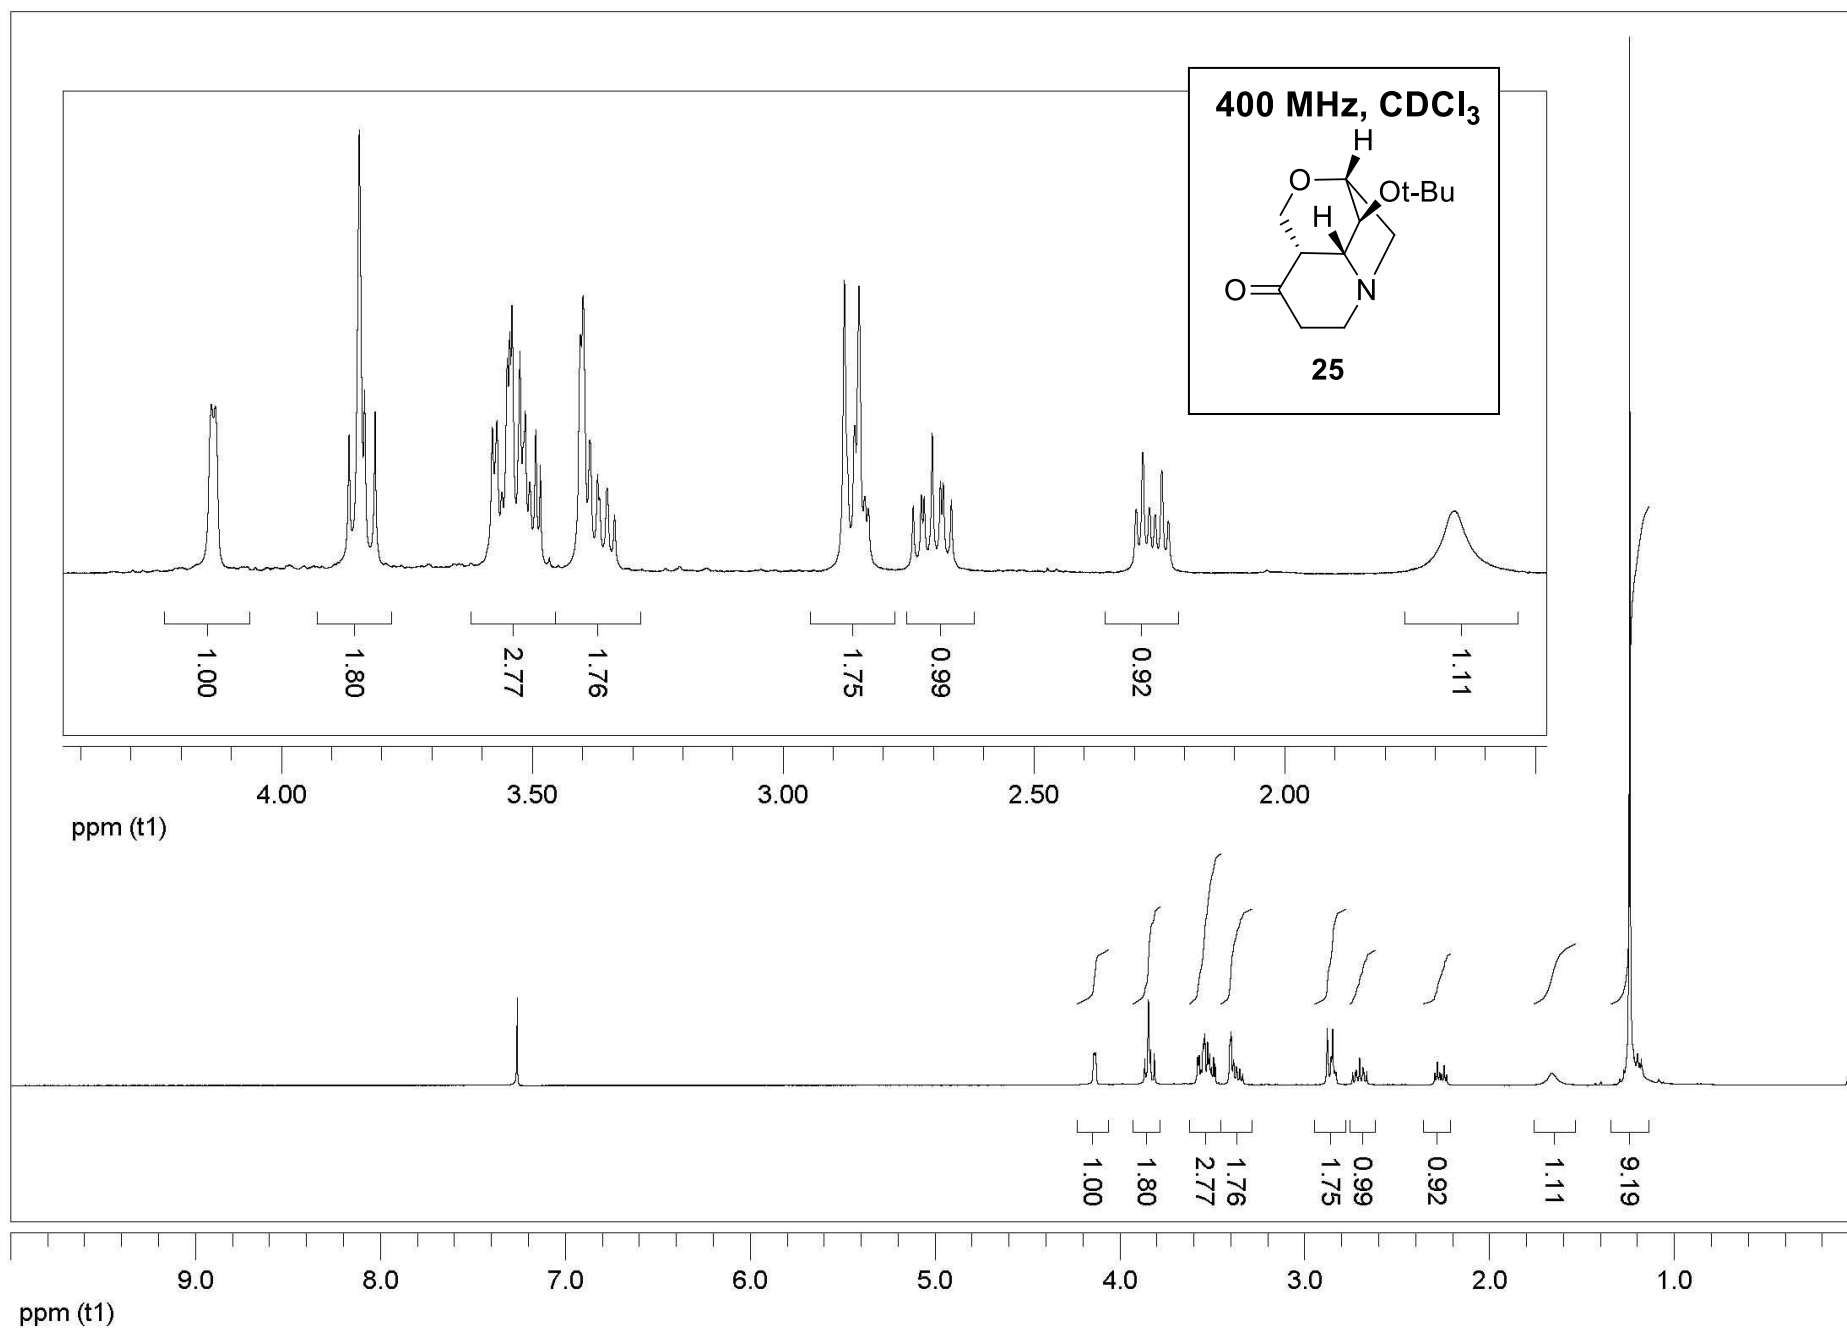

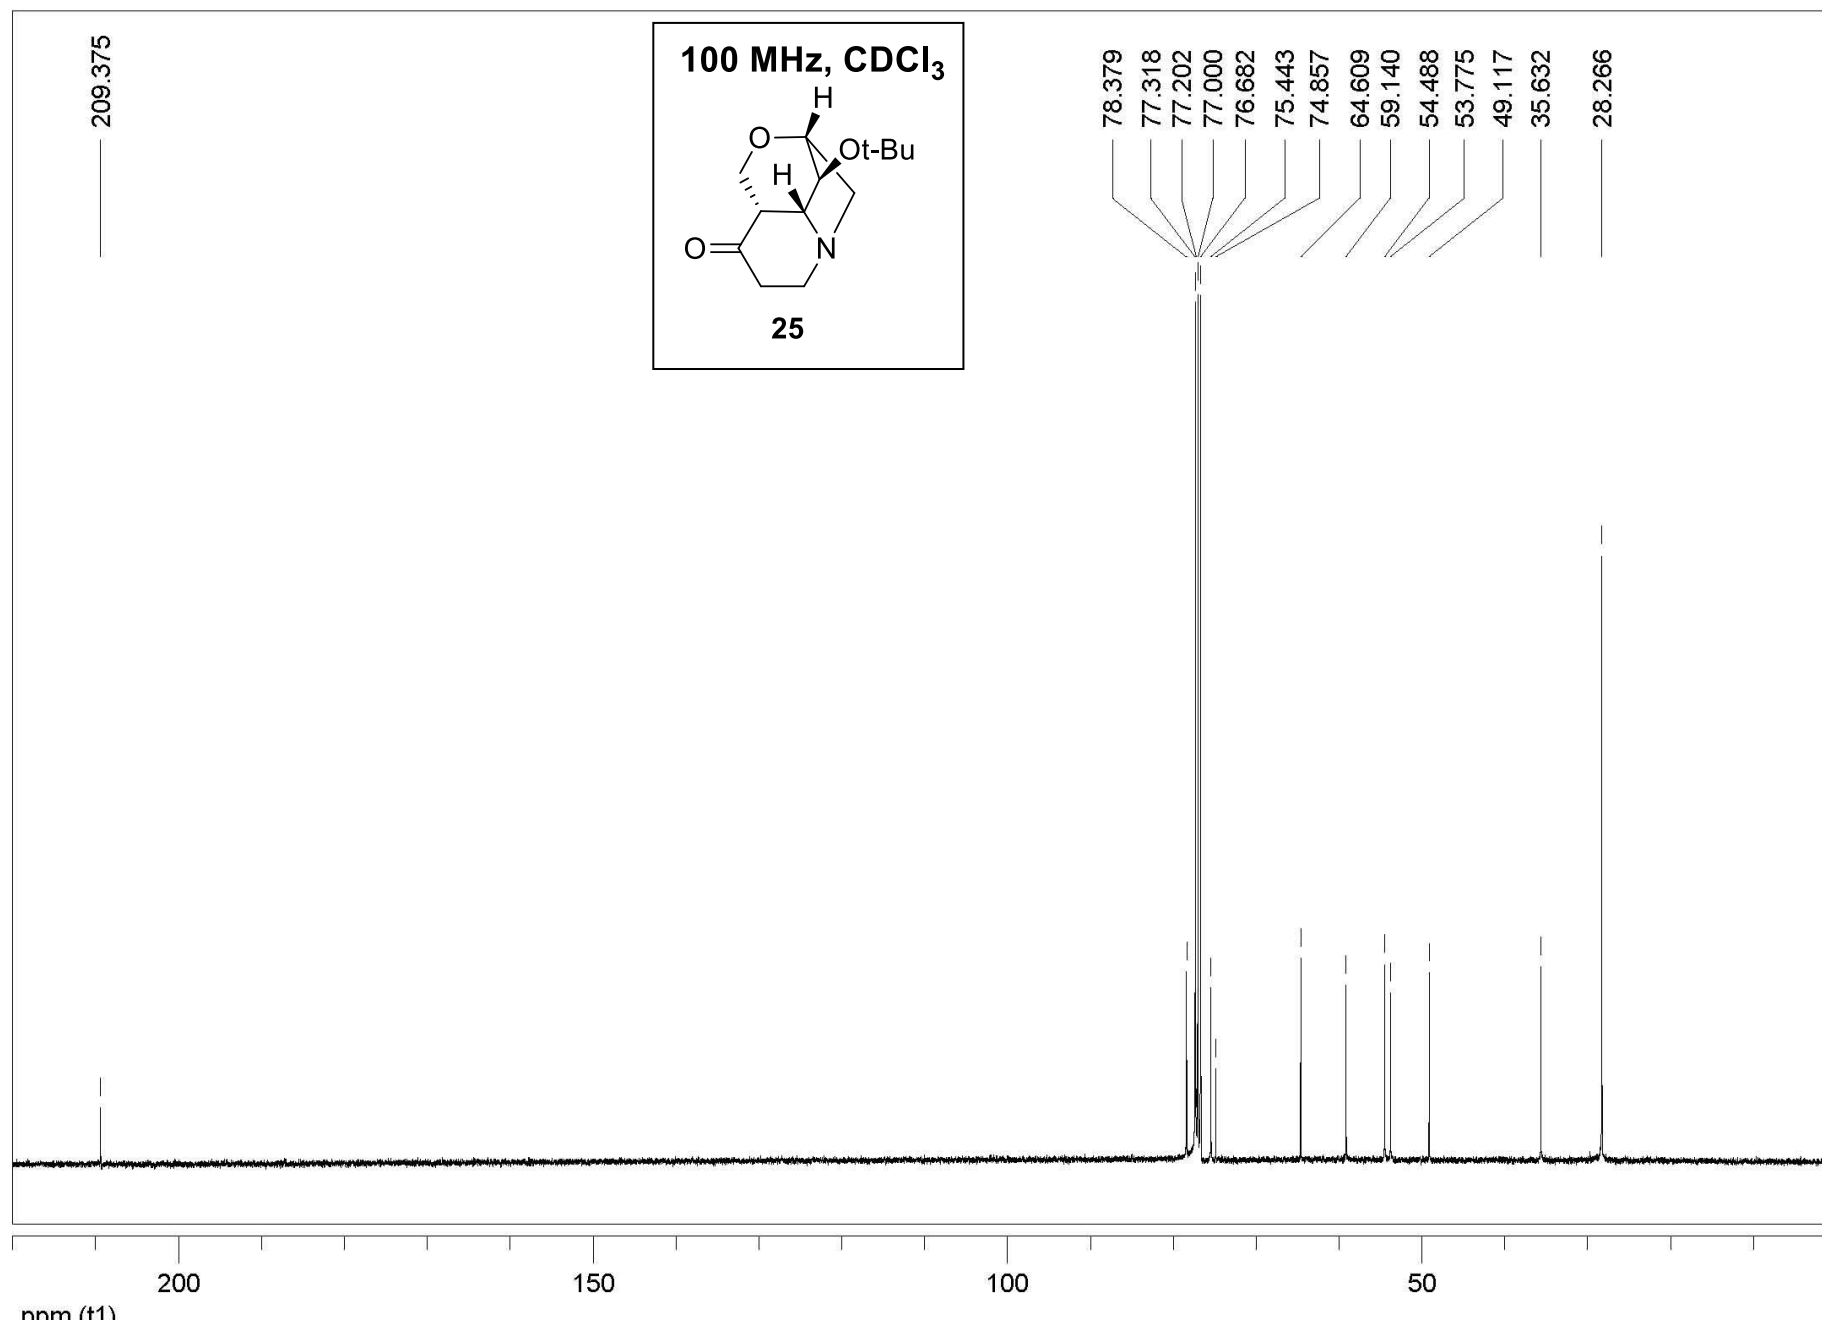

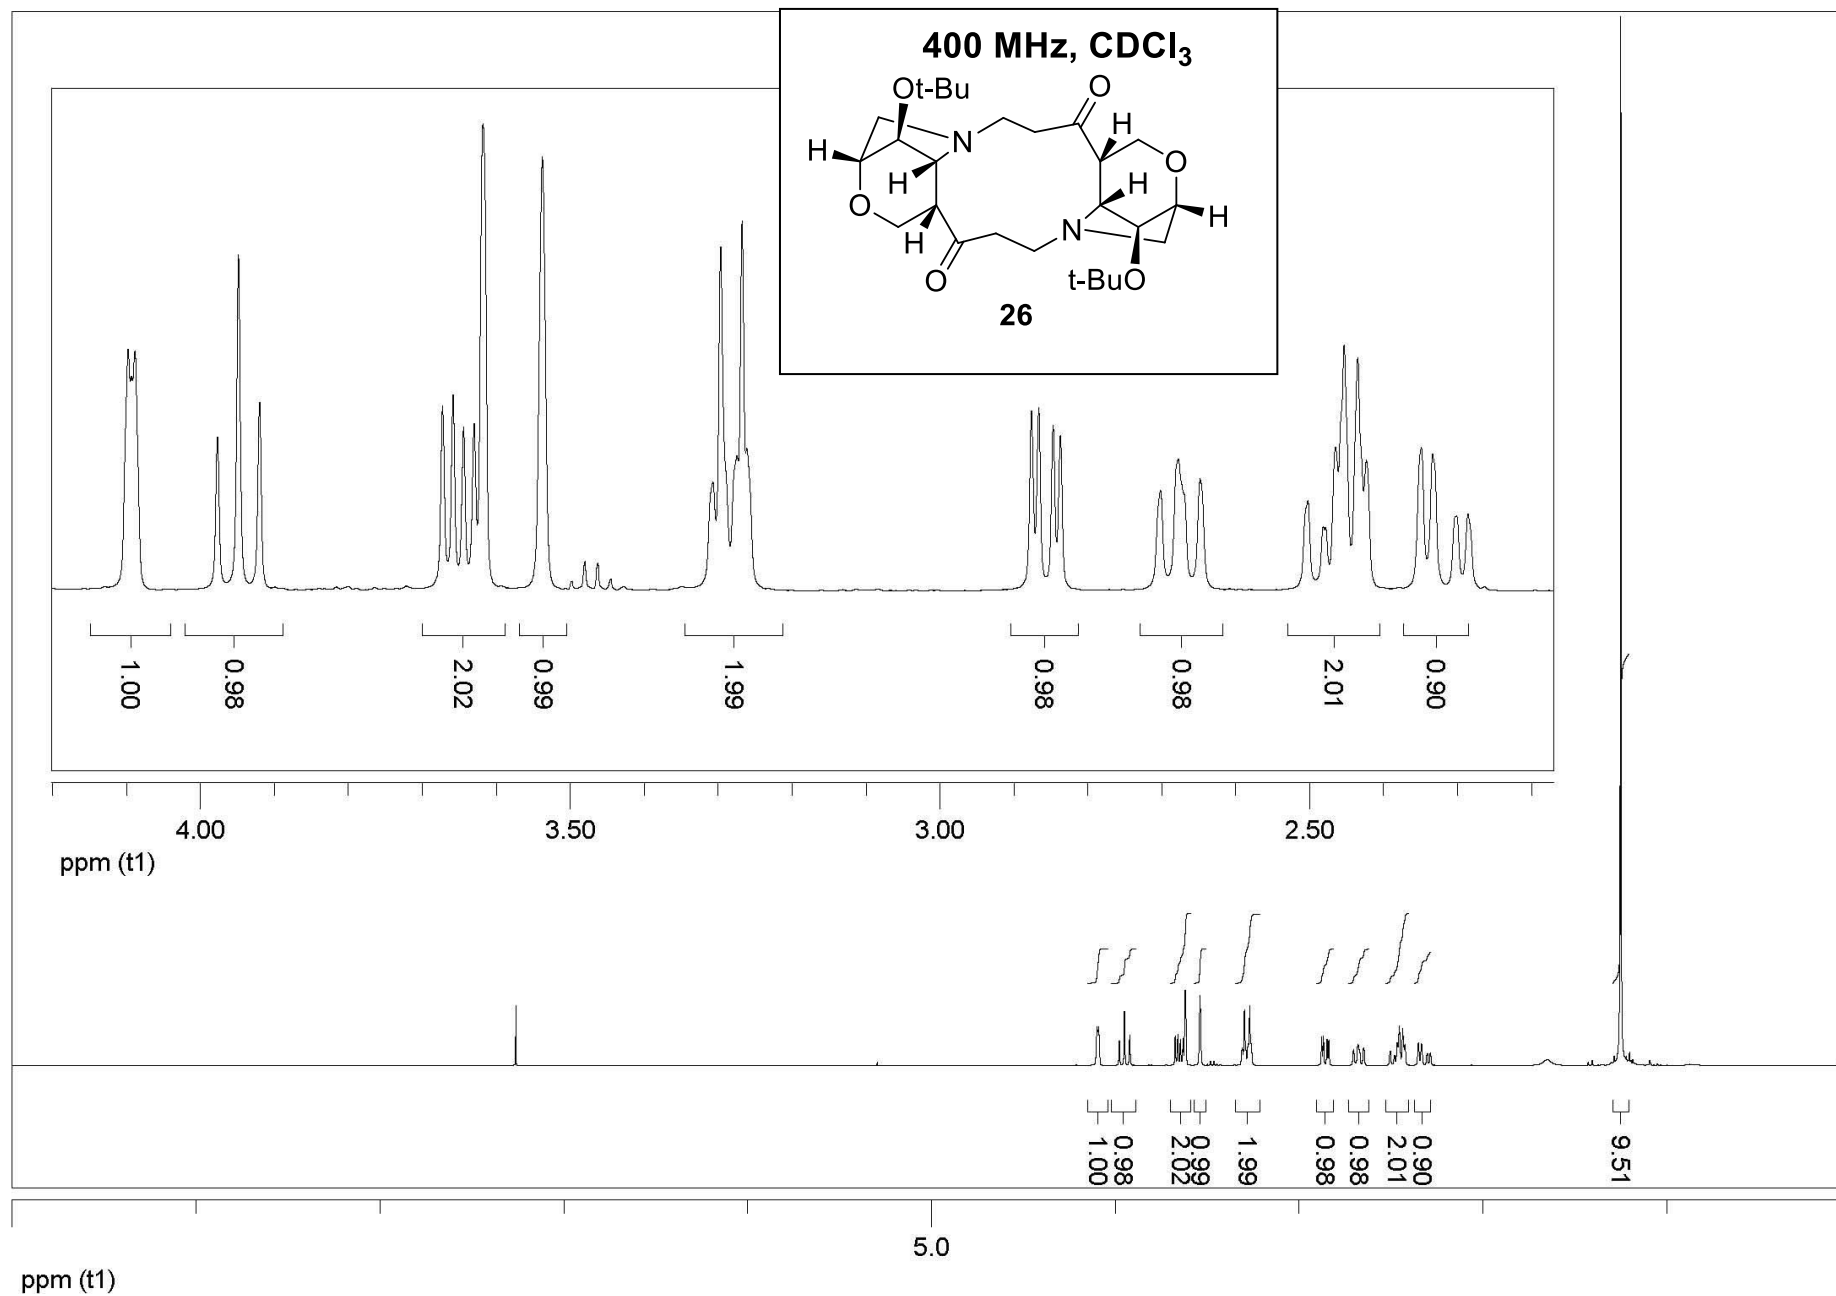

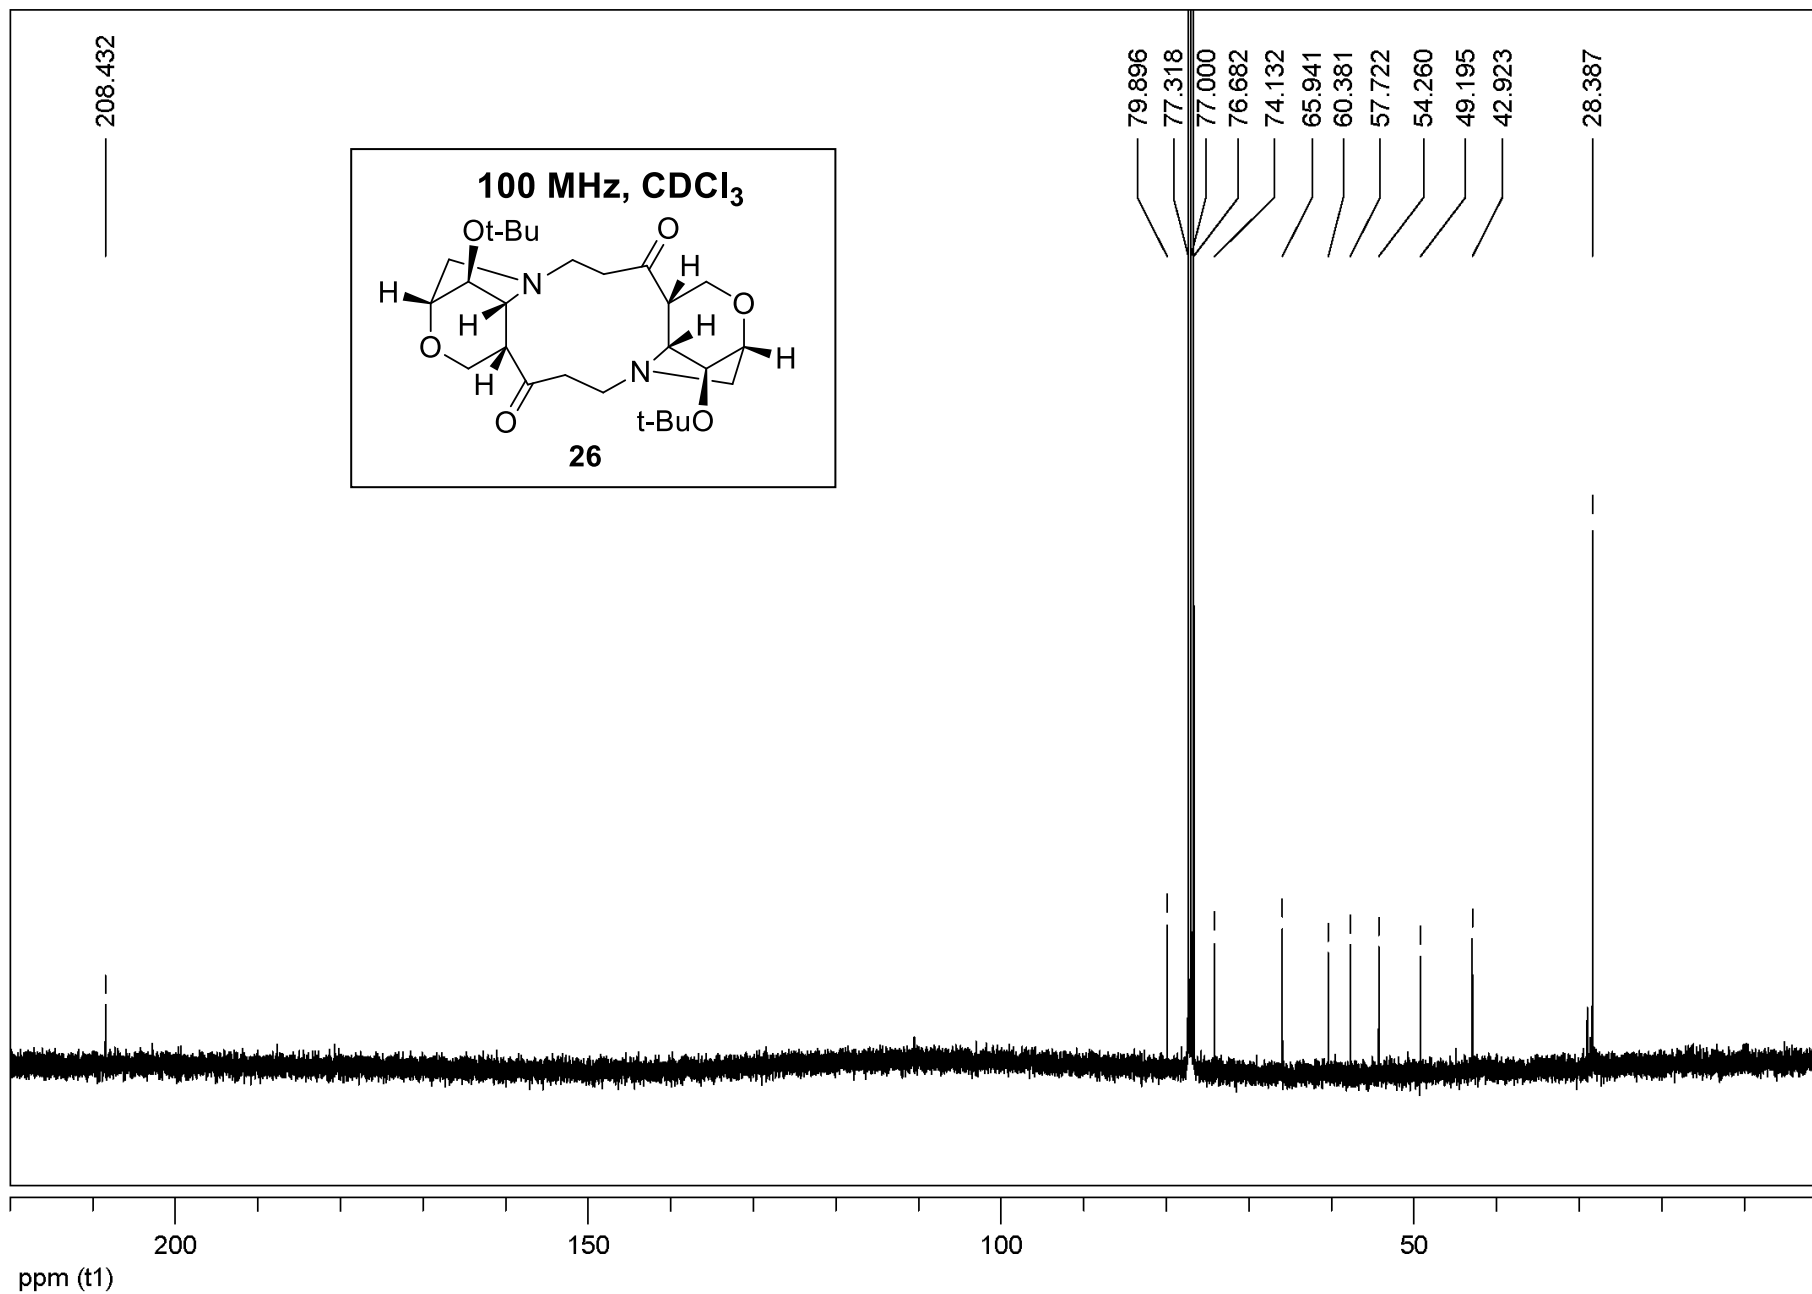

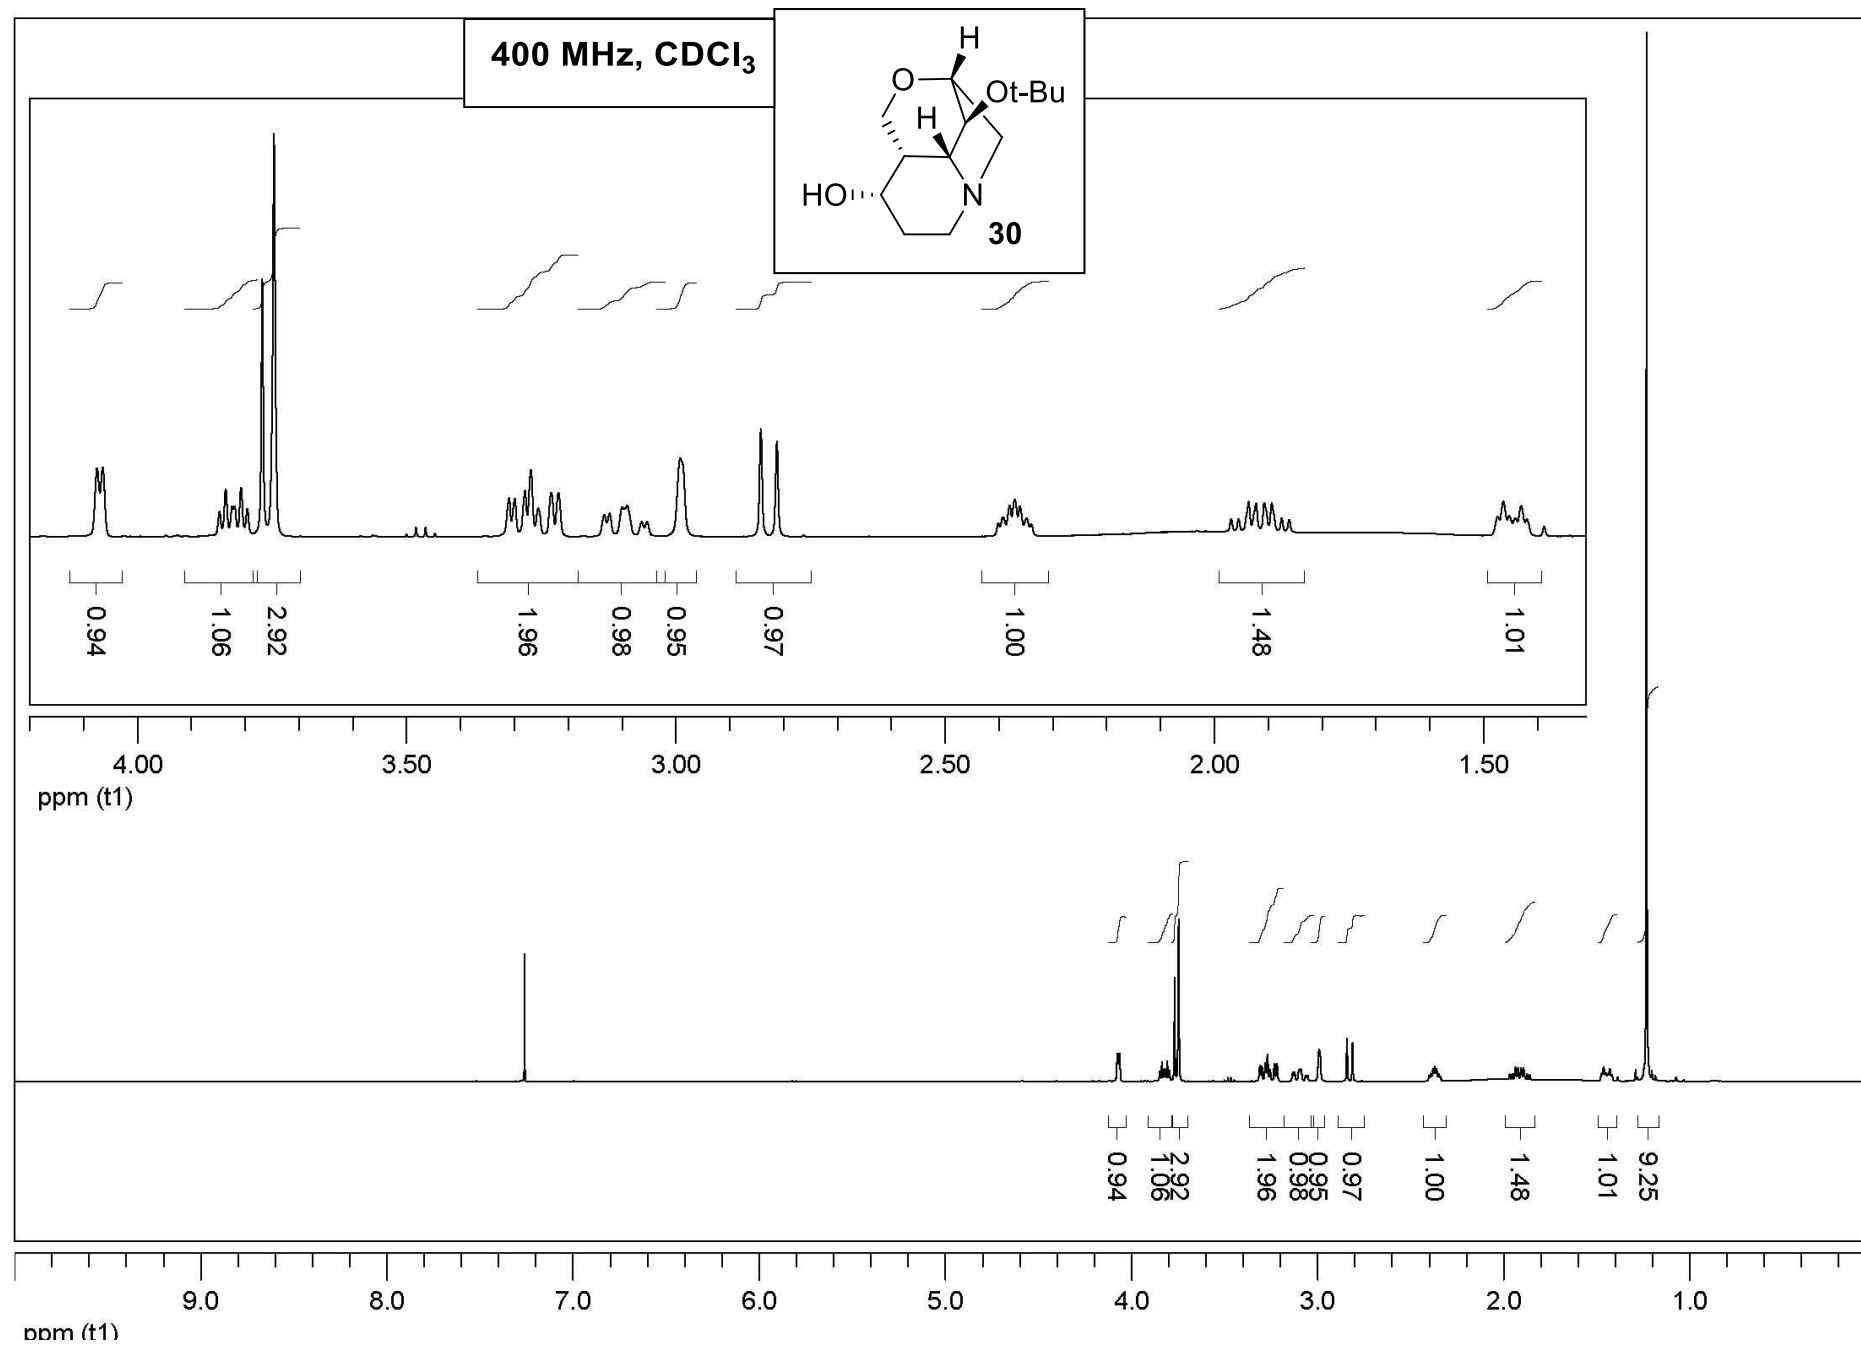

100 MHz, CDCl<sub>3</sub>

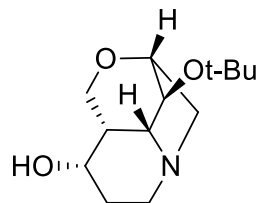

**30**

78.773  
77.000  
76.921  
74.446  
70.601  
63.757  
58.266  
50.760  
46.743  
39.958  
28.265  
23.635

nm (t1)

150

100

50

400 MHz, CD<sub>3</sub>OD

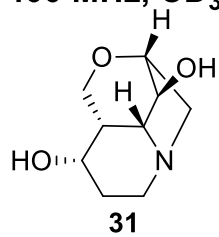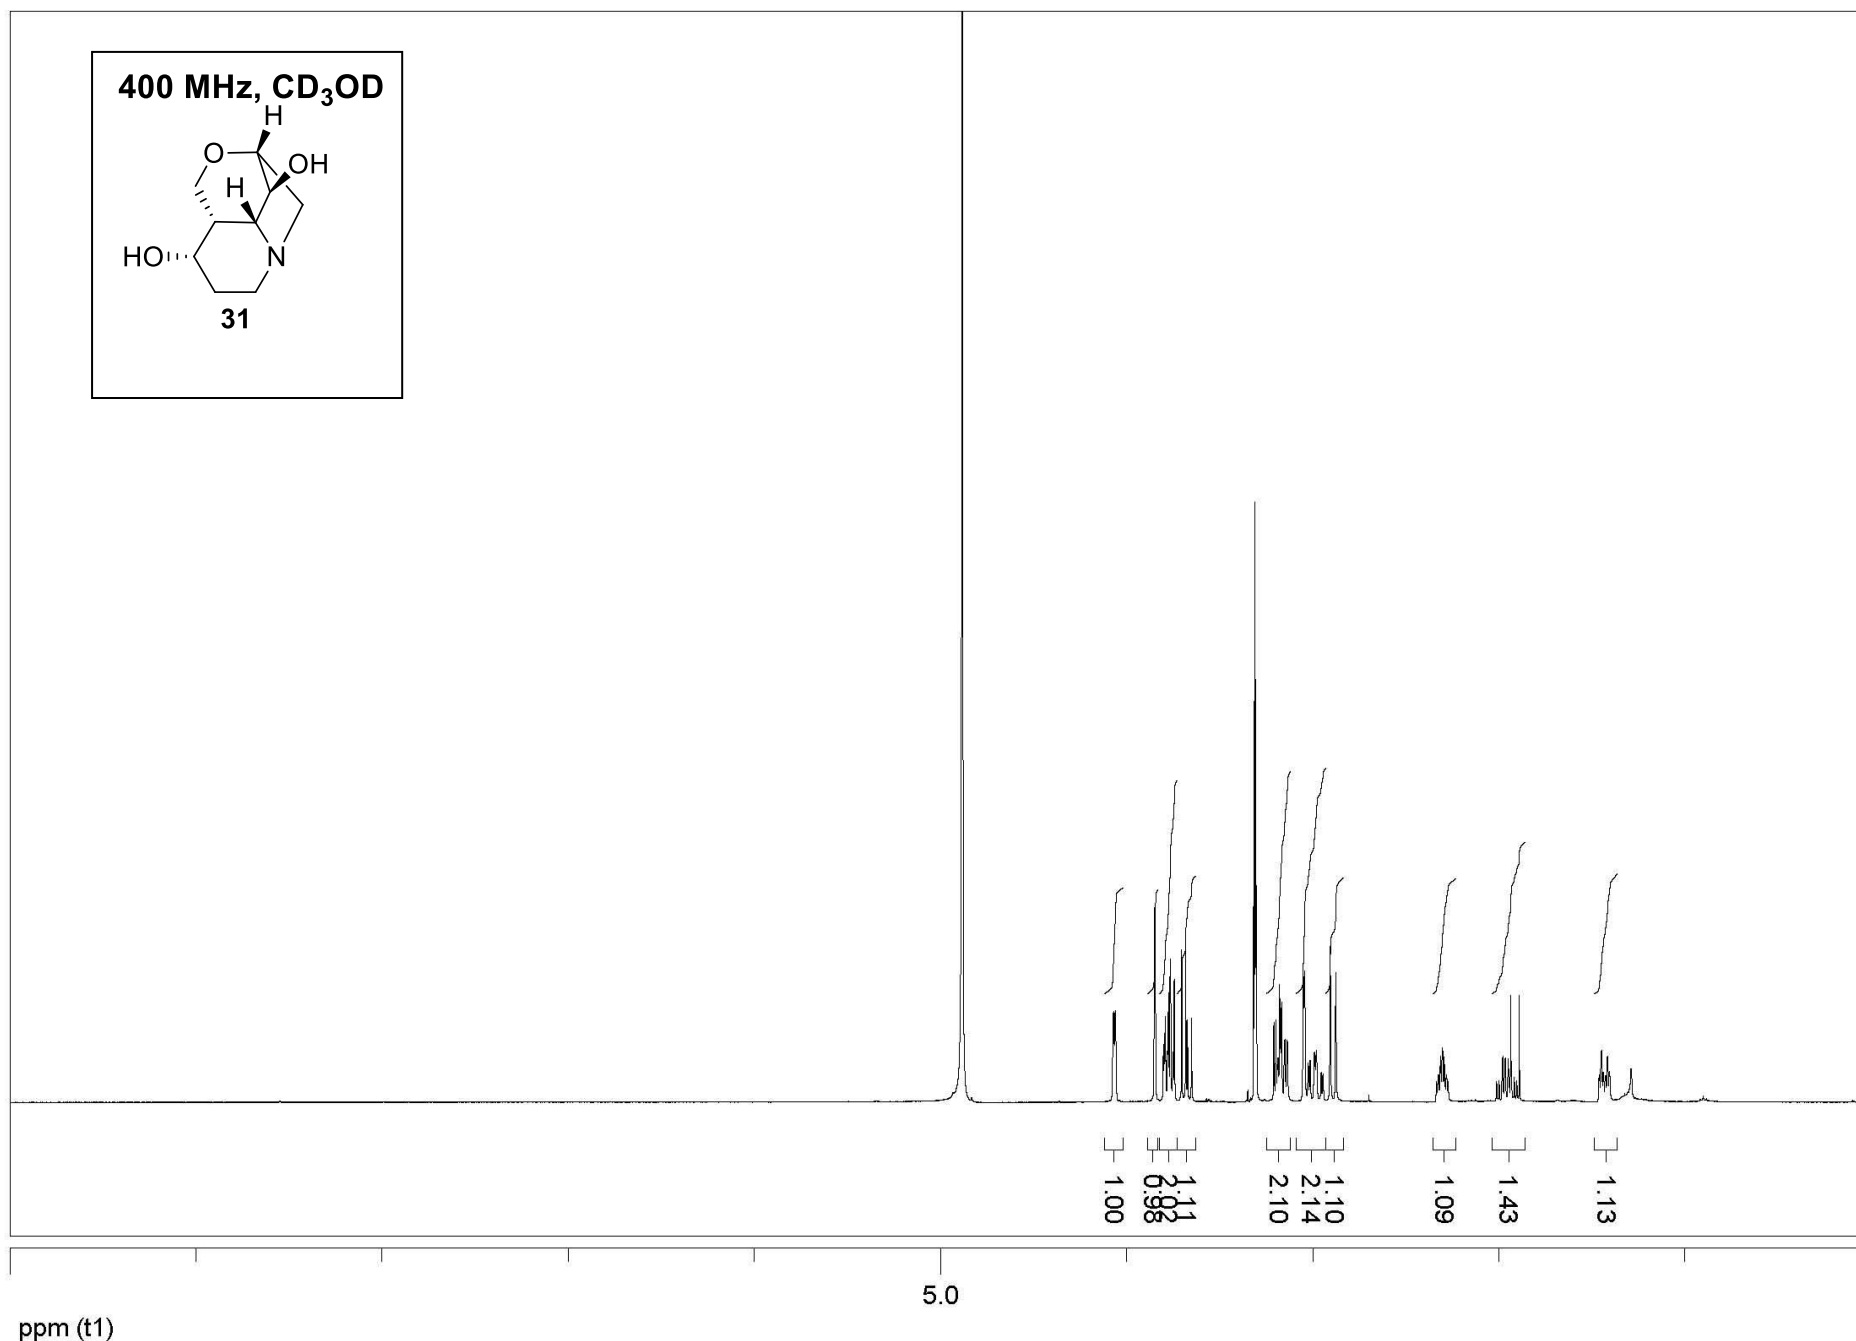

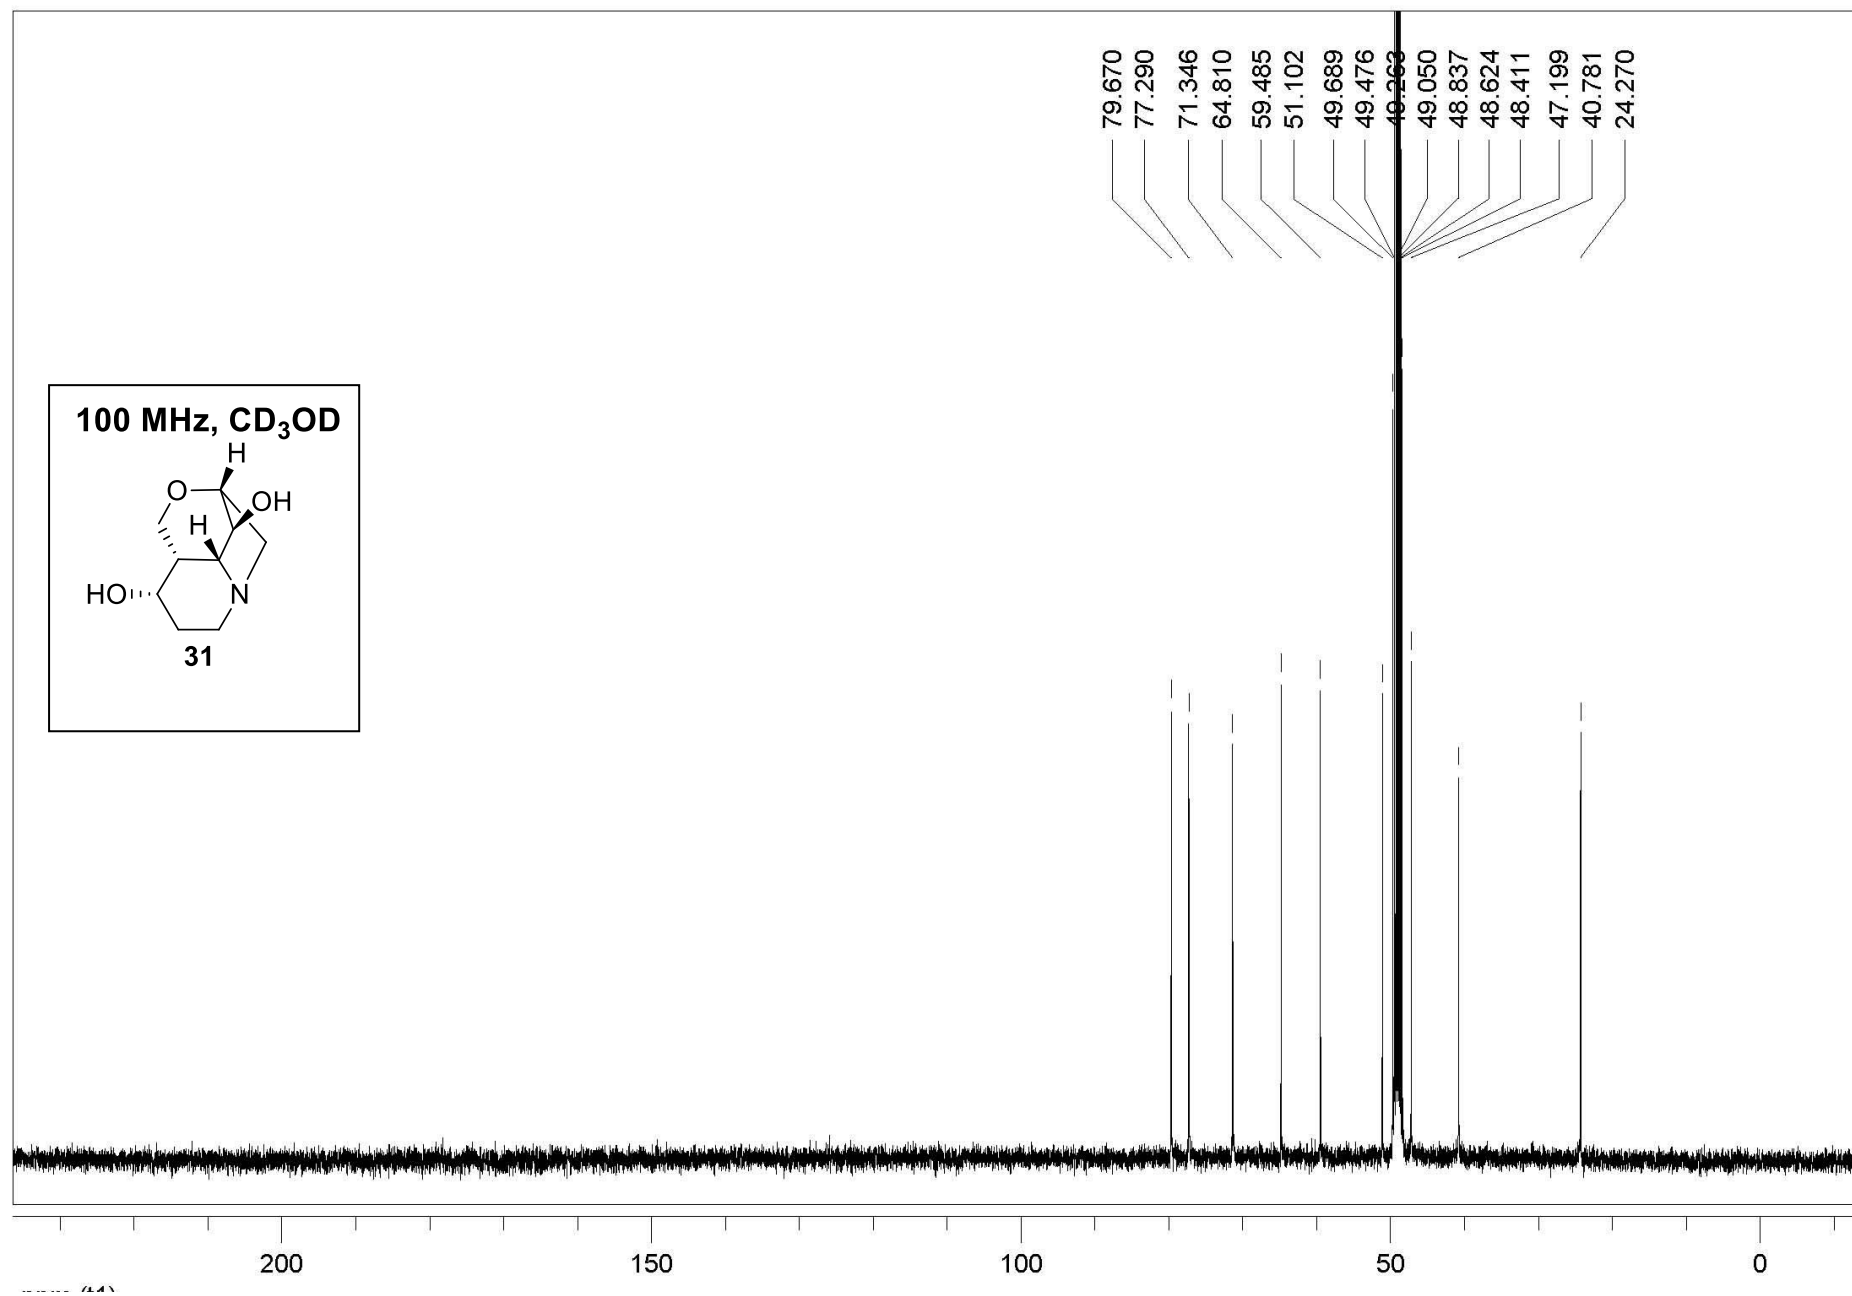

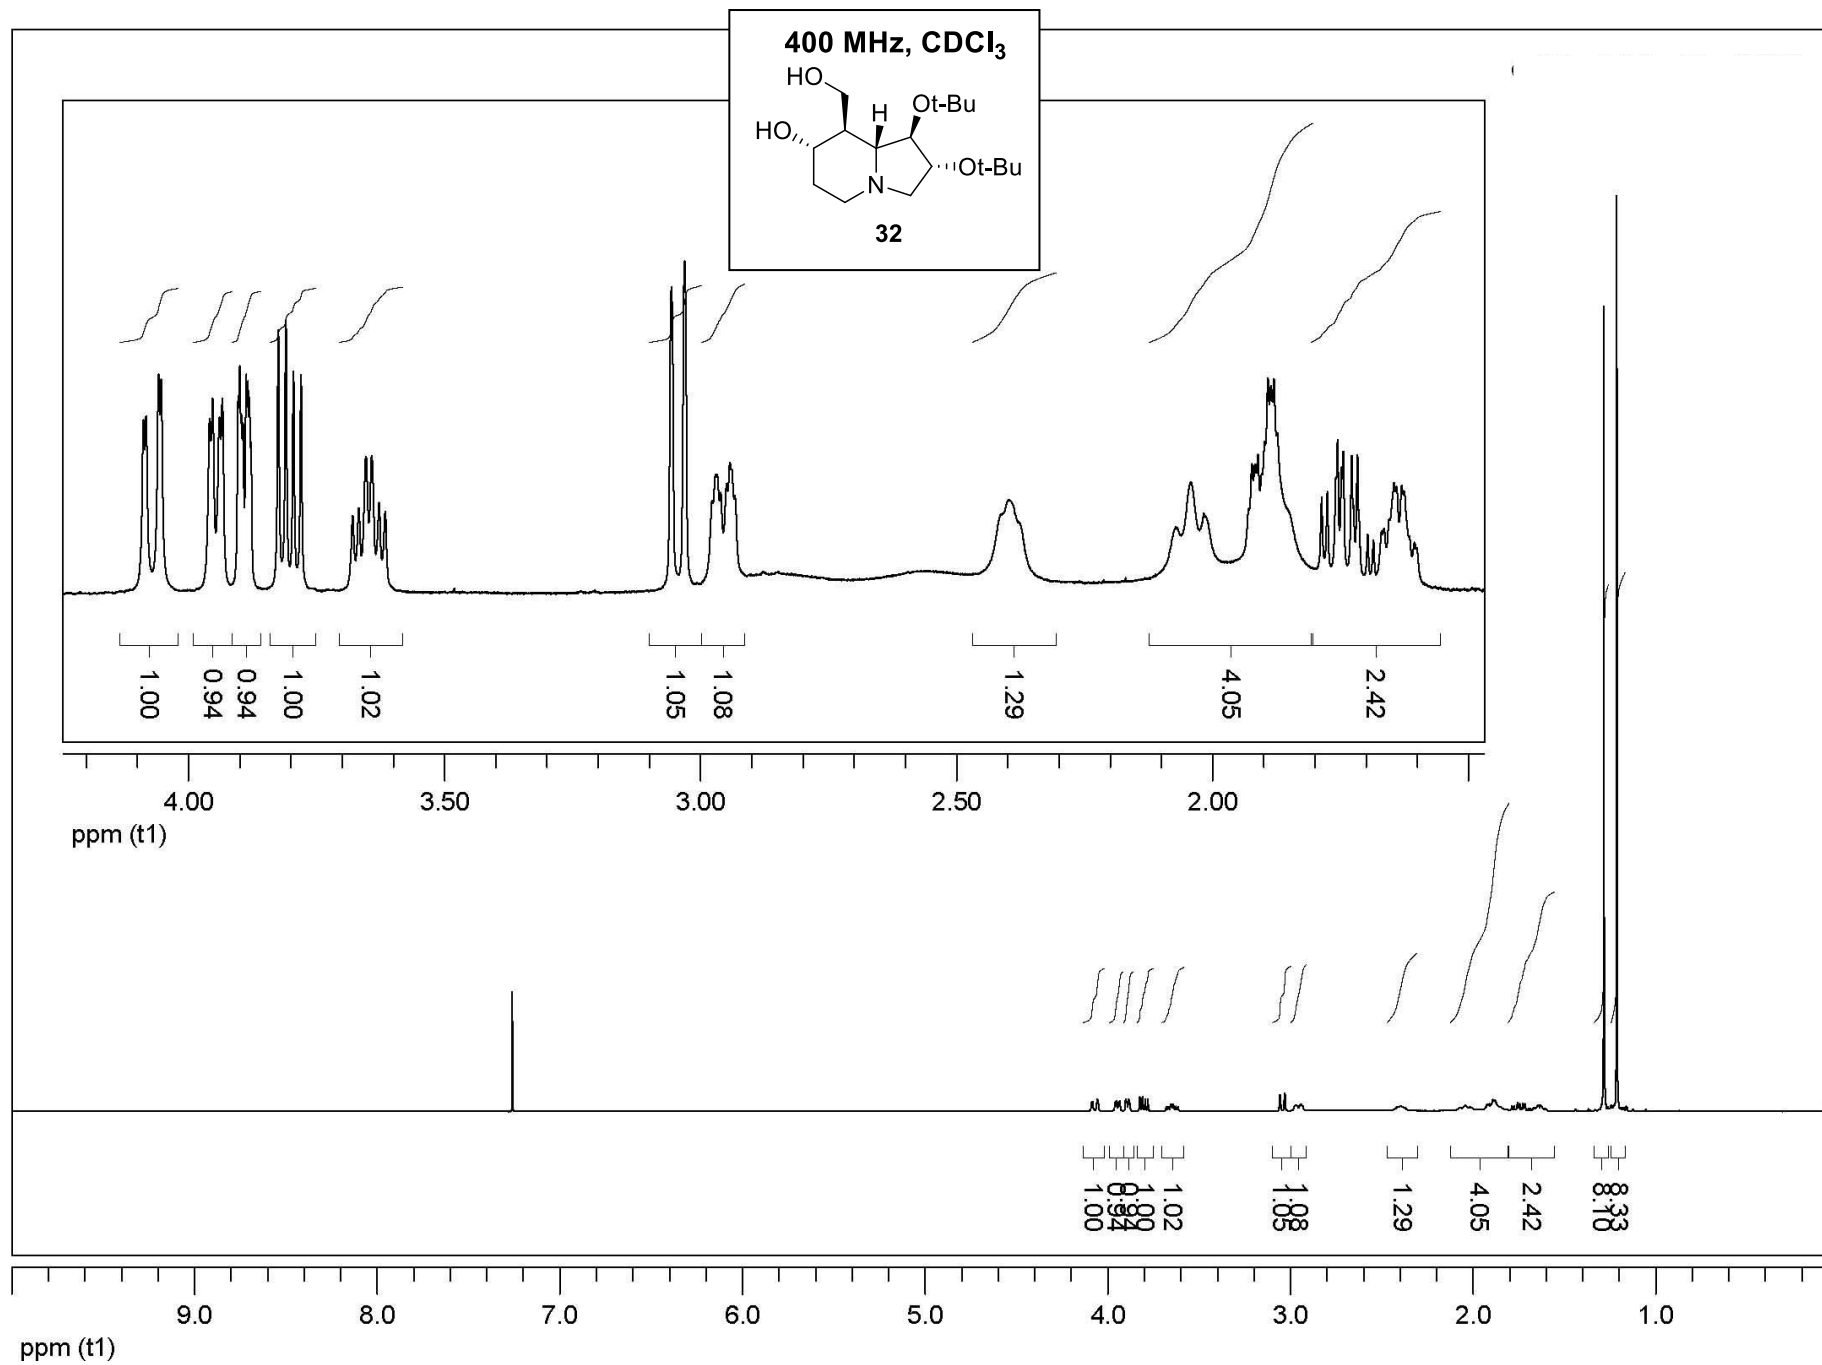

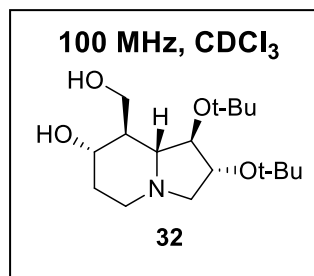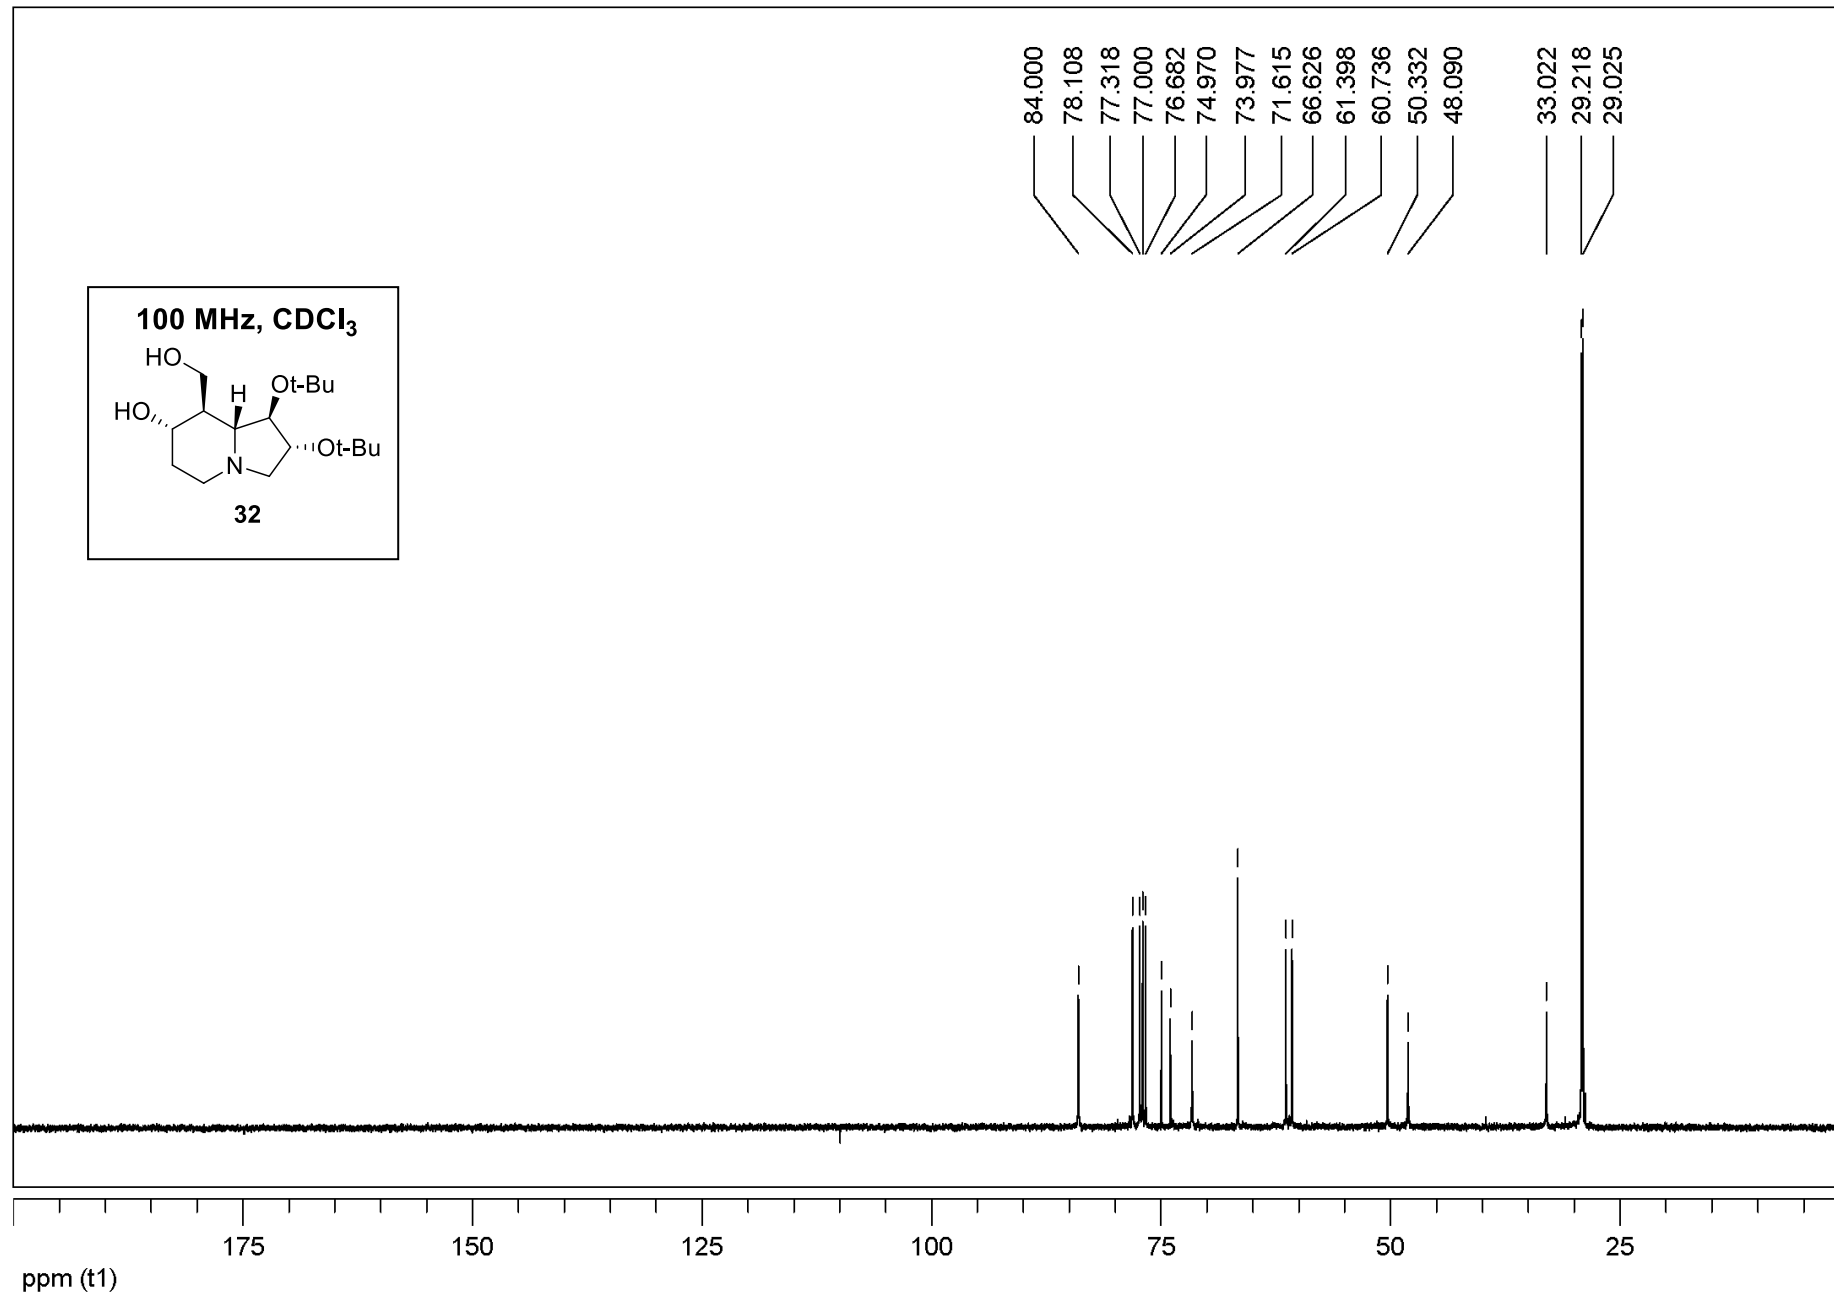

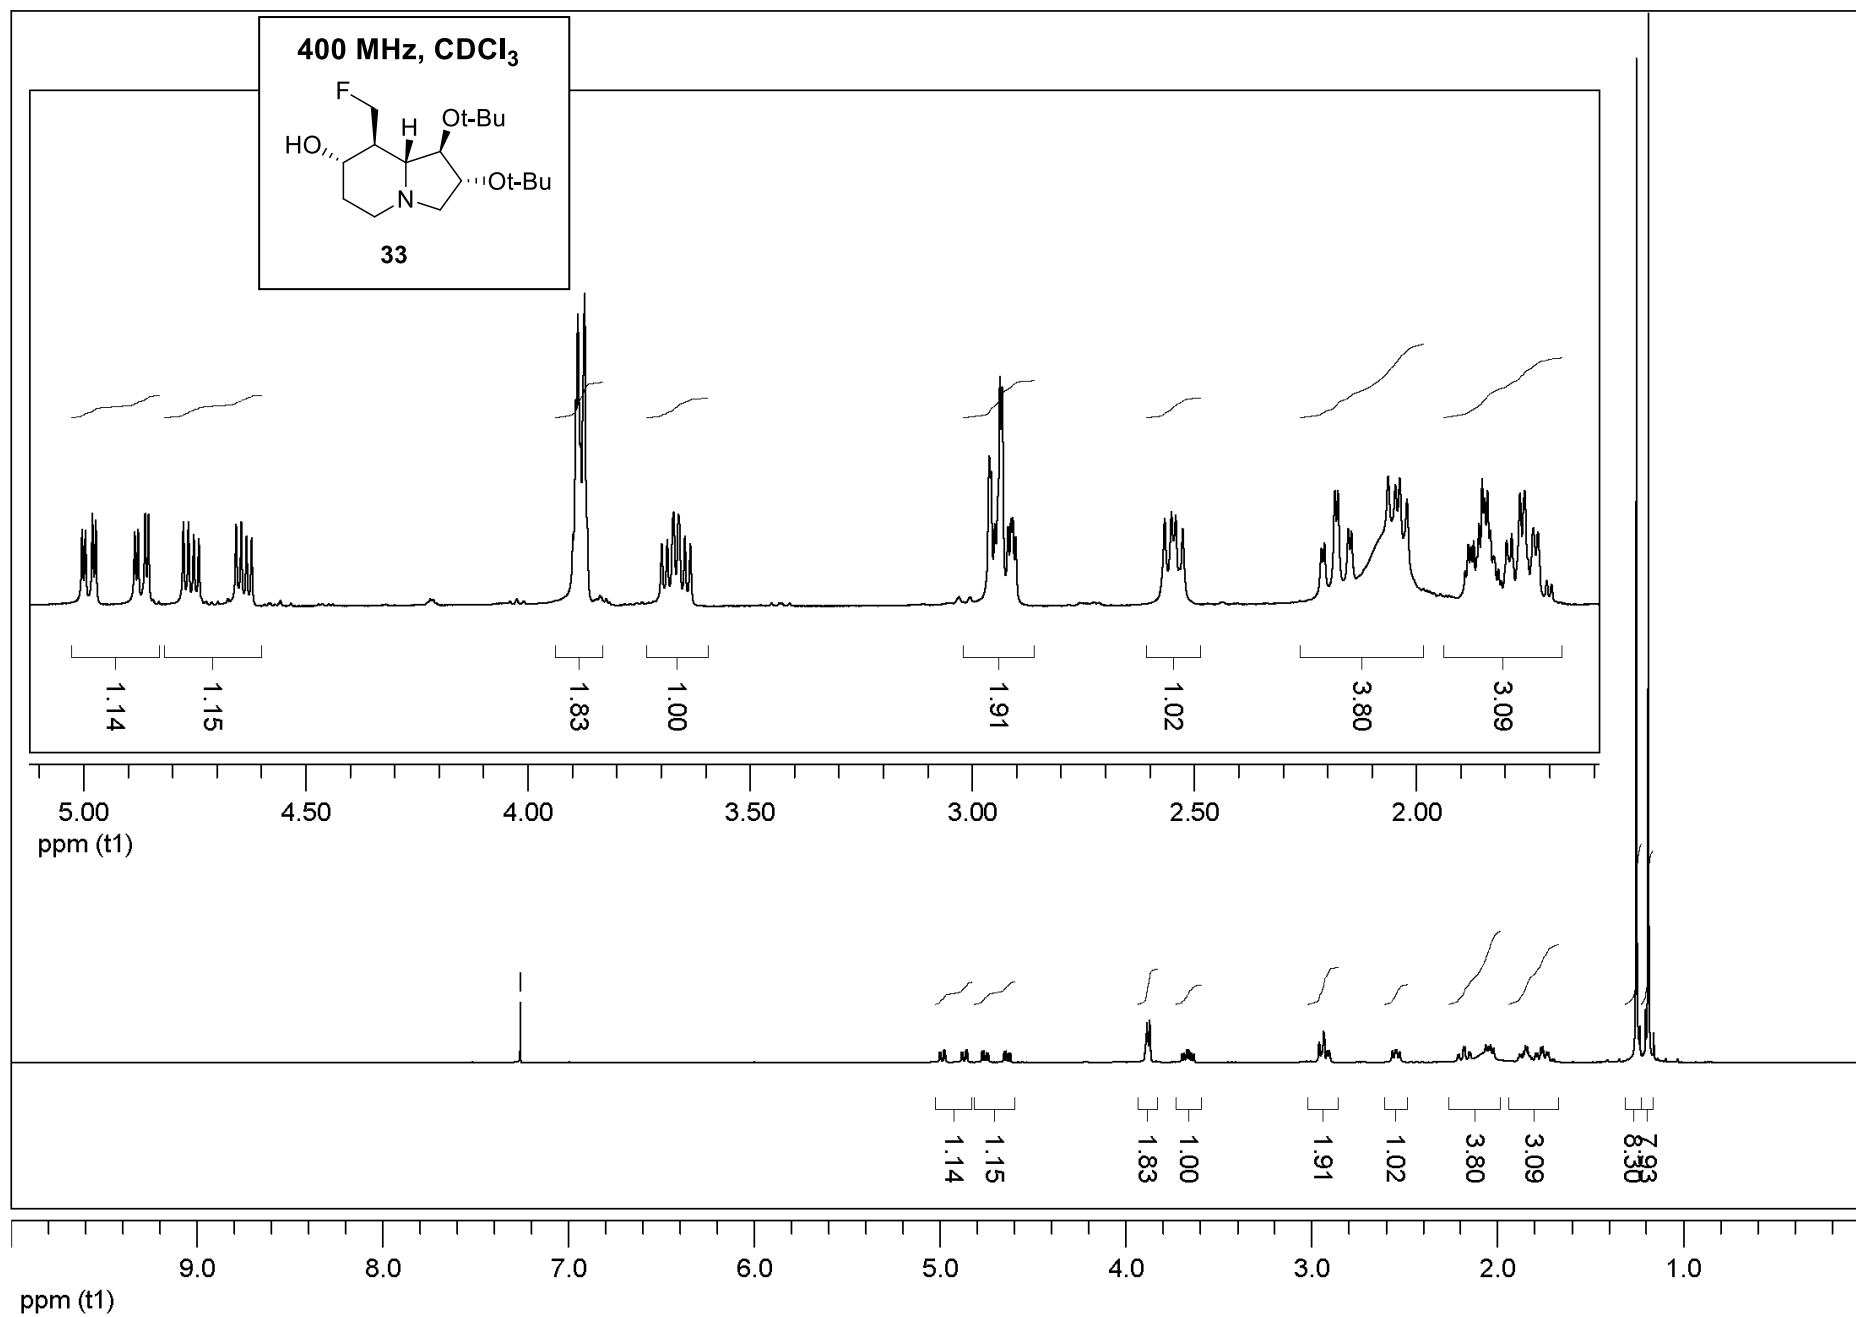

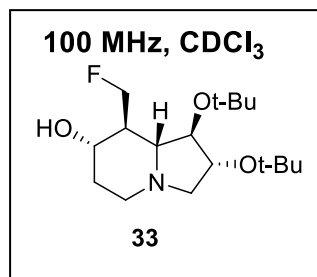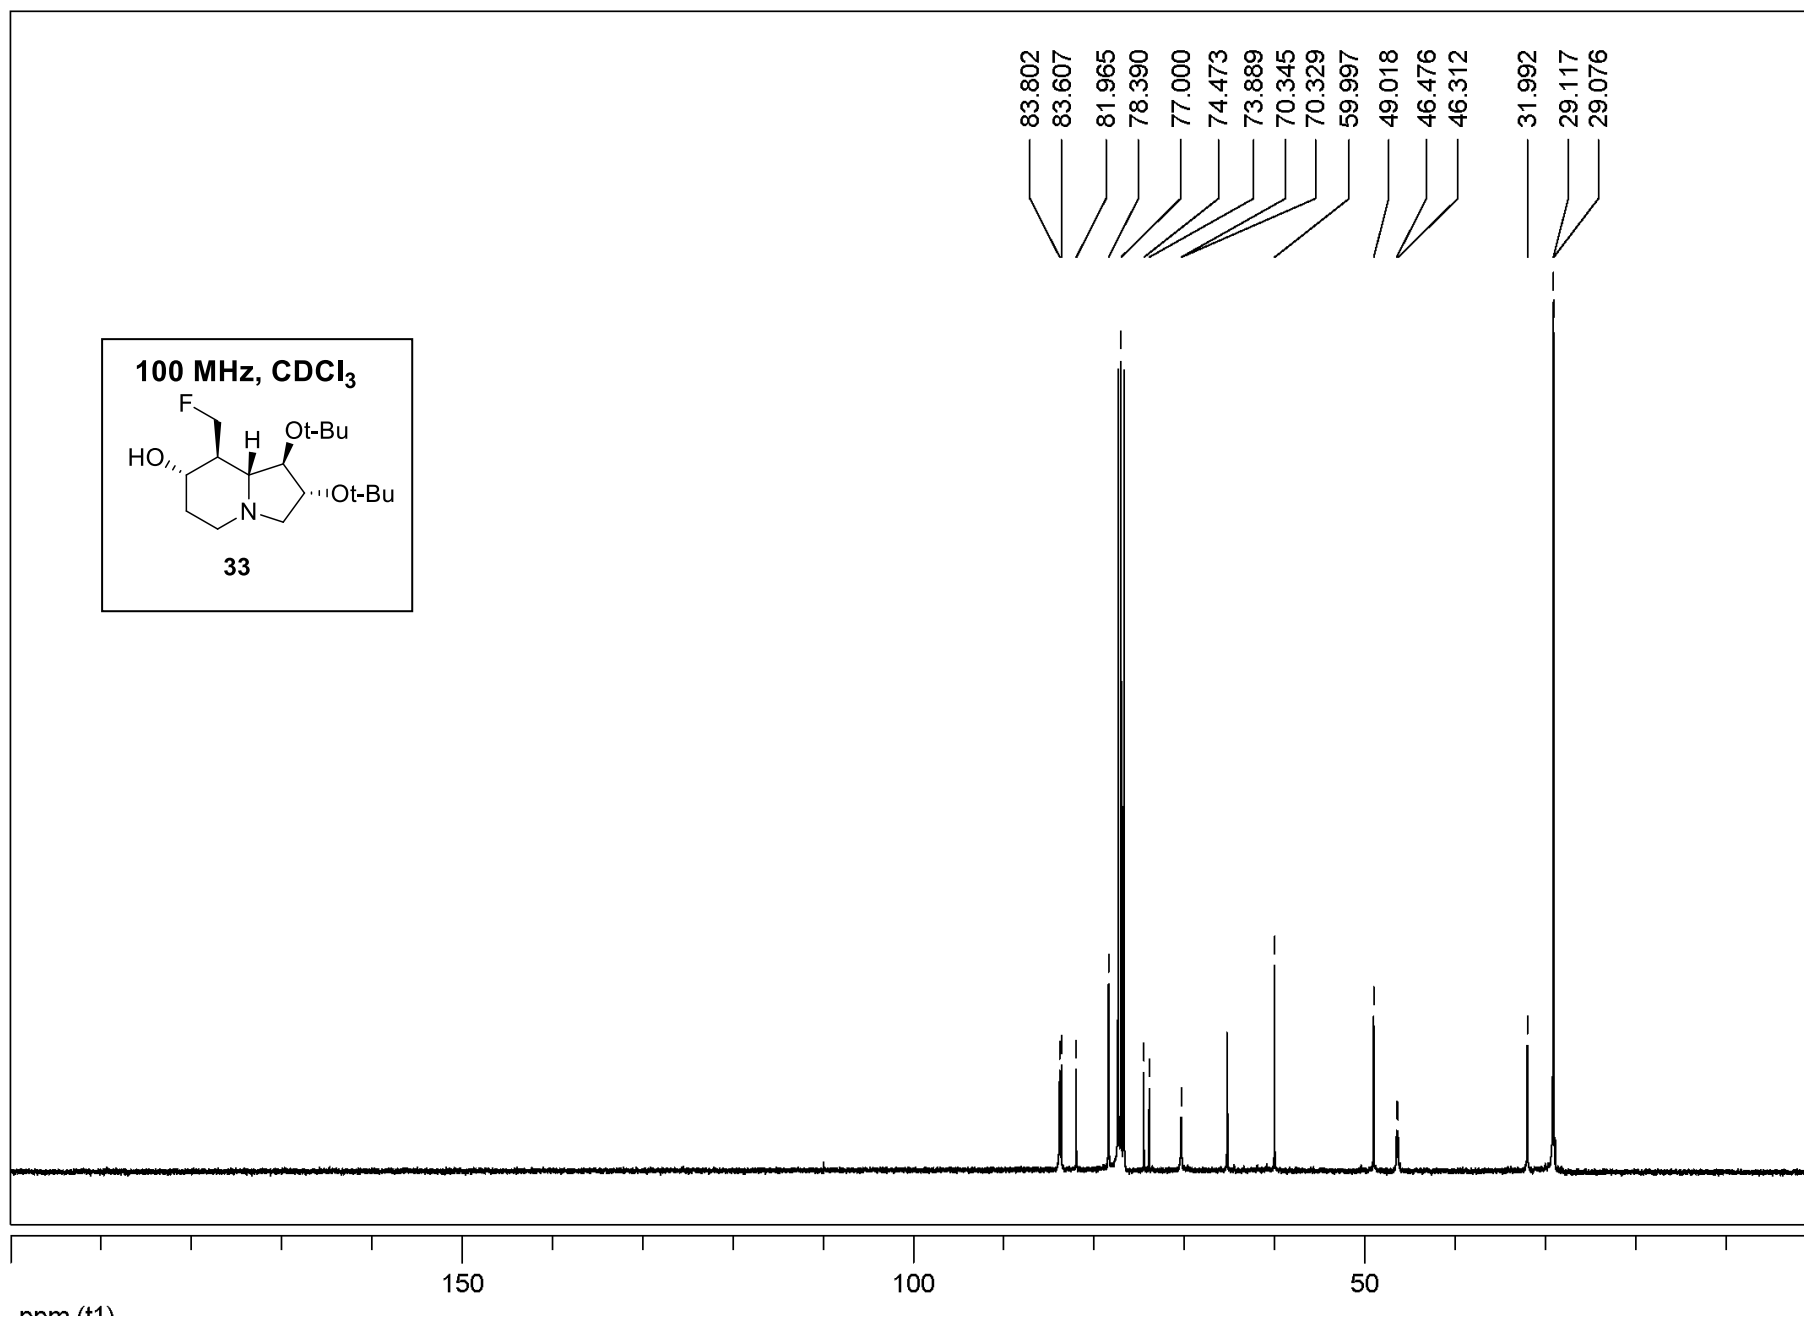

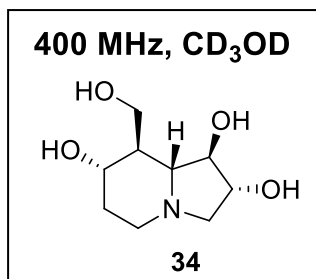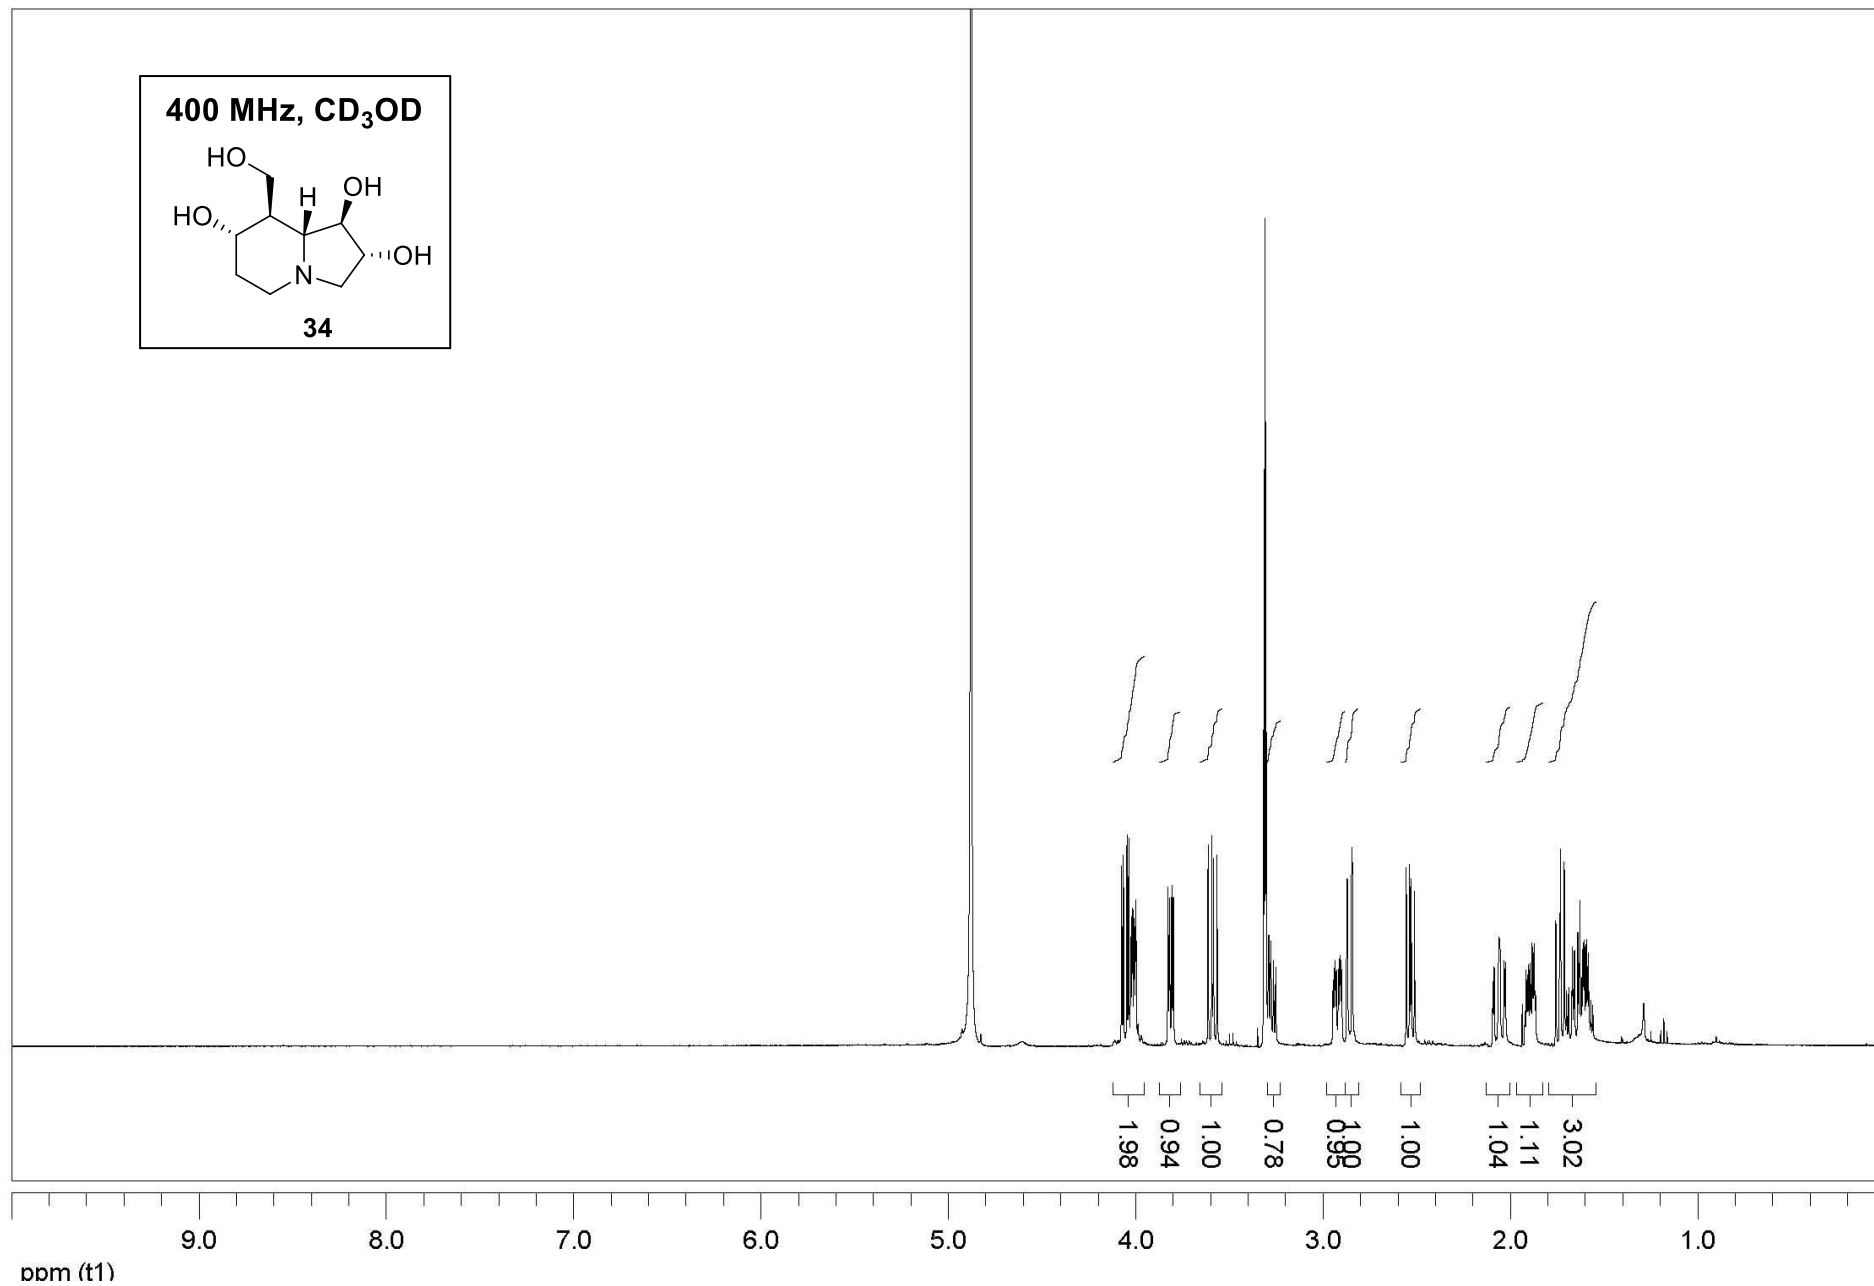

100 MHz, CD<sub>3</sub>OD

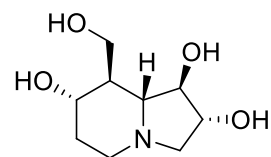

34

84.622  
78.192  
73.151  
70.923  
62.921  
62.338  
51.477  
51.461  
49.050  
34.954

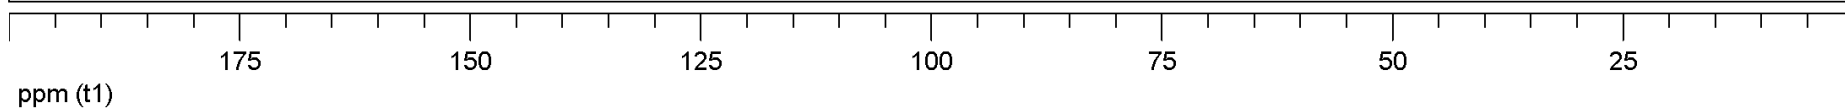

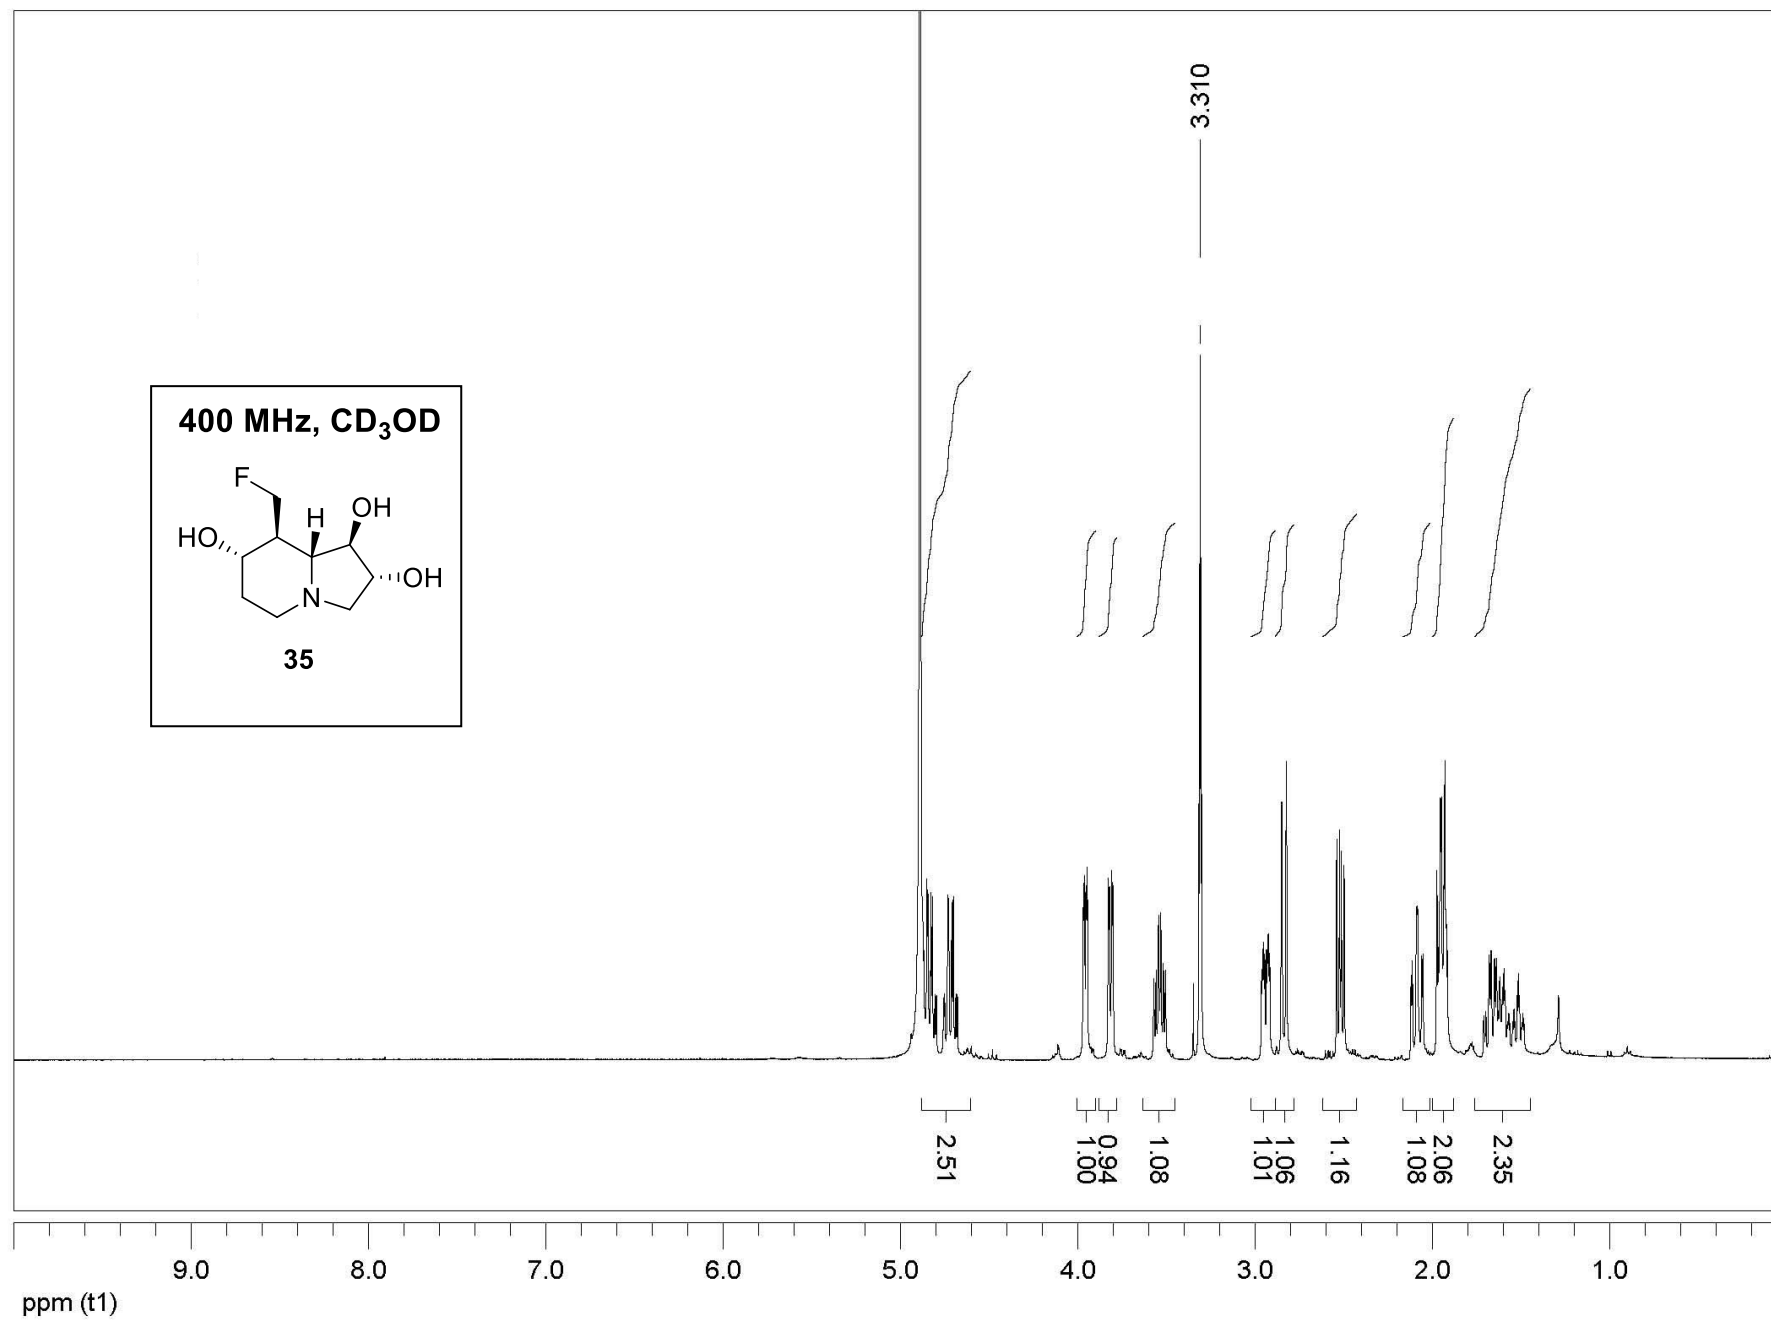

100 MHz, CD<sub>3</sub>OD

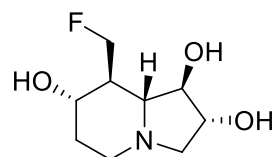

35

84.843  
82.238  
80.586  
79.637  
70.221  
68.739  
68.690  
61.881  
51.352  
50.696  
50.521  
49.050  
34.953

ppm (t1)

150

100

50
